# Supplementary material for: MAX-DOAS measurements of NO 2 , SO 2 , HCHO and BrO at the Mt. Waliguan WMO/GAW global baseline station in the Tibetan Plateau
Source: Copernicus journal article supplement (doi:10.5194/acp-2019-1197), 2020-01-21
Supplement: Supplementary file [file acp-2019-1197-AC2-supplement.pdf]

## ***Interactive comment on “MAX-DOAS measurements of NO<sub>2</sub>, SO<sub>2</sub>, HCHO and BrO at the Mt. Waliguan WMO/GAW global baseline station in the Tibetan Plateau” by Jianzhong Ma et al.: Reply to Anonymous Referee #2***

Referee comments are in black. [Author responses are in blue.](#)

### **General comments.**

Measurements of high altitude background concentrations of atmospheric trace gases and aerosols are an interesting topic, and MAX-DOAS measurements are one sensitive measurement technique to obtain long-term data sets of such quantities. ACPD Unfortunately, this manuscript is mainly a long and very detailed description of the technical aspects of the analysis and the meteorology at the station and provides very little results which are of general interest. I can therefore not recommend this manuscript for publication. I'd suggest that the authors work on the manuscript by removing all unnecessary parts, tightening the technical discussions to what is really needed, and focus more on the results and what we can learn from them. Such a shortened and more focused study could then be re-submitted to ACP or another journal.

[We thank the anonymous referee for his/her insightful comments and constructive suggestions, which are very helpful for improving our manuscript. We have shortened the manuscript by moving the Appendix and other parts, that provide very detailed descriptions of the technical aspects of the analysis and the meteorology, to the Supplement. Some references \(e.g., literatures about previous measurement work at WLG\) and figures \(e.g., wind speed/direction and the effects on the trace gas results\) are removed. We have reorganized the structure of the paper so that it is easy to follow by the readers in wider fields, not limited to experts in remote sensing. Comparisons of the results with previous studies on the levels of NO<sub>2</sub>, SO<sub>2</sub>, HCHO, and BrO in the remote low troposphere are added. We believe that measurements of high altitude background concentrations of these reactive trace gases are of general interest for the atmospheric chemistry community, and thus would like to submit the revised version of the manuscript \(enclosed\) for further review.](#)

### **Major comments**

- The manuscript introduces and discusses many meteorological parameters and their correlations with the measurements, but all correlations are very small and this whole part could be summarised in a single sentence: No significant correlation was found between any of the measured quantities and meteorological parameters. Removing all the unnecessary figures and descriptions on meteorology would already considerably reduce the length of the manuscript.  
[Removed.](#)
- Most of the manuscript deals with technical aspects of the retrieval and in particular in the supplemental material, sensitivity studies are described in great detail. While thorough documentation of the methods used is a good thing, most of what is described is state of the art and could have been summarised in a few short sections.  
[Agreed. We have reorganized the manuscript, with the main results being kept in the main body of the manuscript and details being moved to the Supplement.](#)
- The one point where the authors introduce a better approach than earlier studies, namely accounting for the topography along the line of sight is unfortunately not expanded upon at all

– there is no discussion of what the difference to a standard analysis using a representative surface altitude and a 1d retrieval would have been, how these 2d effects vary with season, snow cover and aerosol optical depth and if this approach results in more accurate results considering that due to computational time limitations, only two scenarios could be computed.

We performed additional radiative transfer simulations with flat surfaces, either at sea level or at 3700m altitude. It was found that the results for the elevated surface at 3700m are very similar to those using a realistic topography. In contrast the results for the flat surface at sea level differ strongly. These findings and the corresponding results are added to the revised version of the manuscript (in section 4). There also the following information about the influence of the surface albedo was added:

Simulations with high surface albedo representative for snow surfaces yielded almost the same results. This finding can be understood by the fact that the measurements and the Fraunhofer reference spectra are affected by changes of the surface albedo in the same way. Thus, for the retrieved dSCDs the effect of the surface albedo cancels out.

- Unfortunately, the measurements were performed with a simple, not very sensitive instrument and are therefore not of high quality. Because the shading tube was missing, zenith measurements could not be used which leads to a further reduction in sensitivity. The fact that elevation calibration appears to be off by  $4^\circ$  further increases uncertainties, in particular as this implies that the authors cannot be sure about the exact pointing of the horizontal measurements they use. This uncertainty needs to be evaluated and included in the error budget.

We admit that Mini MAX-DOAS is a simple instrument, but it is stable, solid, and was proven to be very suitable for long-term measurements under harsh environments like over the plateau. Concerning the elevation calibration, we disagree with the reviewer: From the comparison of the measurement and model results shown in Fig. S3 it can be concluded that the corrected elevation calibration is rather accurate. Deviations larger of  $0.5^\circ$  would be clearly obvious. Thus we conclude that the updated elevation calibration is correct within  $\pm 0.5^\circ$

- There is literally no discussion of the results in terms of comparison to other measurements or model results or what we can learn from the three years of measurements which are presented. As suggested, we have added a subsection (Sect. 6.3 in the revised version) to compare our results with previous studies, including measurements of  $\text{NO}_2$ ,  $\text{SO}_2$  and HCHO by other methods at WLG and measurements of  $\text{NO}_2$ ,  $\text{SO}_2$ , HCHO and BrO by MAX-DOAS in other remote areas at middle and subtropical latitudes.

## Minor comments

- I believe that the excessive listing of references at the top of page 4 makes no sense as these references have no connection to the topic of this manuscript.

We have deleted these references in the revised manuscript.

- I'm not so sure about the discussion of straylight on page 8. My guess is, that the straylight correction does not primarily correct for more straylight in the reddish direct sun spectra (cloudy sky spectra should have a similar wavelength distribution as direct sun spectra) but that it corrects for the change in wavelength dependence of Fraunhofer filling in.

There is an important difference between direct sun measurements and scattered light measurements under cloudy skies. The effect of Rayleigh scattering on air molecules is opposite:

-for direct sun measurements, Rayleigh scattering leads to a decrease of light at short wavelengths compared to top of the atmosphere sun spectrum.

-for scattered light spectra in cloudy conditions, Rayleigh scattering above the cloud increase the light at short wavelengths.

For measurements in the UV spectral range as used in this study, the difference is substantial.

- It should at least be mentioned that zenith measurements which are used here for the CI were earlier discarded for trace gas retrievals because of suspected direct sun impact  
Done. Please see Sect. 5.1 of the revised manuscript.
- Figure 8: Are these realistic stratospheric BrO profiles? This would imply a factor of 4 variability in stratospheric BrO columns – has this been observed in measurements?  
Of course, the profiles shown in the figure include extreme scenarios. Nevertheless, variations of more than a factor of 2 are usually found in satellite observations close to and over polar regions, see. e.g. Fig. 9 in Theys et al., 2011. Here it should be noted that the BrO VCDs in the tropics are even smaller and below the minimum of the colour scale used in this figure.  
(Theys, N., Van Roozendael, M., Hendrick, F., Yang, X., De Smedt, I., Richter, A., Begoin, M., Errera, Q., Johnston, P. V., Kreher, K., and De Mazière, M.: Global observations of tropospheric BrO columns using GOME-2 satellite data, *Atmos. Chem. Phys.*, 11, 1791–1811, <https://doi.org/10.5194/acp-11-1791-2011>, 2011.).
- Figure 10: Title of figures not correct  
This figure has been moved to the Supplement as Fig. S27. The title was corrected: dAMF => dSCDs
- Figure 11: t does not become clear if all directions are included in the statistics and if so why. My understanding is that only 1 measurements were used in a quantitative way.  
Indeed, in Fig. 11 (for old version) all directions were included. We agree with the reviewer that the statistics for 1 °elevation should be shown. We replaced Fig. 11 accordingly (see Fig. 6 in the revised manuscript). It should be noted that the relative frequencies of the sky conditions stay almost unchanged.
- Conclusions, line 22: Enhanced trace gas mixing ratios – enhanced in comparison to what?  
In comparison to the higher elevation angles. We added this information to the text.
- I'm surprised that no reference is made to the paper  
Gomez, L., Navarro-Comas, M., Puentedura, O., Gonzalez, Y., Cuevas, E. and Gil-Ojeda, M.: Long-path averaged mixing ratios of O<sub>3</sub> and NO<sub>2</sub> in the free troposphere from mountain MAX-DOAS, *Atmos. Meas. Tech.*, 7(10), 3373–3386, doi:10.5194/amt-7-3373-2014, 2014.  
which uses a similar method for a related topic.  
We have added this and two other references (Gil-Ojeda et al., 2015; Schreier et al., 2016) in the Introduction and Sect. 6.3 of the revised manuscript, and the results from this study are compared with previous studies, including Gomez et al. (2014).

# MAX-DOAS measurements of NO<sub>2</sub>, SO<sub>2</sub>, HCHO and BrO at the Mt. Waliguan WMO/GAW global baseline station in the Tibetan Plateau

Jianzhong Ma<sup>1</sup>, Steffen Dörner<sup>2</sup>, Sebastian Donner<sup>2</sup>, Junli Jin<sup>3</sup>, Siyang Cheng<sup>1</sup>, Junrang Guo<sup>1</sup>, Zhanfeng Zhang<sup>4</sup>, Jianqiong Wang<sup>4</sup>, Peng Liu<sup>4</sup>, Guoqing Zhang<sup>4</sup>, Janis Pukite<sup>2</sup>, Johannes Lampel<sup>5</sup>, Thomas Wagner<sup>2</sup>

<sup>1</sup>State Key Laboratory of Severe Weather & CMA Key Laboratory of Atmospheric Chemistry, Chinese Academy of Meteorological Sciences, Beijing, China

<sup>2</sup>Max Planck Institute for Chemistry, Mainz, Germany

<sup>3</sup>CMA Meteorological Observation Centre, Beijing, China

10 <sup>4</sup>Waliguan Observatory, Qinghai Meteorological Bureau, Xining, China

<sup>5</sup>Institute of Environmental Physics, University of Heidelberg, Heidelberg, Germany

*Correspondence to:* Thomas Wagner (thomas.wagner@mpic.de) and Jianzhong Ma (majz@cma.gov.cn)

## Abstract.

Mt. Waliguan Observatory (WLG) is a World Meteorological Organization (WMO)/Global Atmosphere Watch (GAW) global baseline station in China. WLG is located at the northeastern part of the Tibetan plateau (36°17'N, 100°54'E, 3816 m a.s.l.) and is representative of the pristine atmosphere over the Eurasian continent. We made long-term ground-based MAX-DOAS measurements at WLG during the period 2012–2015. In this study, we retrieve the differential slant column densities (dSCDs) and estimate the tropospheric background mixing ratios of different trace gases, including NO<sub>2</sub>, SO<sub>2</sub>, HCHO and BrO, using the measured spectra at WLG. Averaging of 10 original spectra is found to be an ‘optimum option’ for reducing both the statistical error of the spectral retrieval and systematic errors in the analysis. The dSCDs of NO<sub>2</sub>, SO<sub>2</sub>, HCHO and BrO under clear sky and low aerosol load conditions are extracted from measured spectra at different elevation angles at WLG. By performing radiative transfer simulations with the model TRACY-2, we establish approximate relationships between the trace gas dSCDs at 1° elevation angle and the corresponding average tropospheric background volume mixing ratios. Mixing ratios of these trace gases in the lower troposphere over WLG are estimated to be in a range of about 5 ppt (January) to 70 ppt (May) for NO<sub>2</sub>, below 0.5 ppb for SO<sub>2</sub>, between 0.3 and 0.7 ppb for HCHO, and lower than 0.3 ppt for BrO. Our study provides valuable information and data set for further investigating tropospheric chemistry in the background atmosphere and their links to anthropogenic activities.

## 1 Introduction

Nitrogen oxides (NO<sub>x</sub> ≡ NO + NO<sub>2</sub>), sulfur dioxide (SO<sub>2</sub>), formaldehyde (HCHO), and bromine monoxide (BrO) are important traces gases in tropospheric chemistry. Both NO<sub>x</sub> and HCHO participate in the control of the strong oxidant O<sub>3</sub>,

which is an indicator of photochemical smog, and the strongest atmospheric oxidizing agent OH, which determines the lifetimes of many gaseous pollutants and greenhouse gases in the atmosphere (Seinfeld and Pandis, 2006;Ma et al., 2012;Lelieveld et al., 2016). NO<sub>x</sub> and SO<sub>2</sub> are gaseous precursors of nitrate and sulfate aerosols, and large amounts of these aerosols can result in haze pollution and exert a strong negative radiative forcing on the climate change (Seinfeld and Pandis, 2006;Forster et al., 2007;Ma et al., 2010). NO<sub>x</sub> and SO<sub>2</sub> are released from various anthropogenic emission sources, e.g., the burning of coal, oil, gas, wood, and straw (Granier et al., 2011;Zhao et al., 2012). NO<sub>x</sub> is also emitted via natural processes including lightning and microbial activities in soils (Lee et al., 1997). Nitric oxide (NO) dominates NO<sub>x</sub> released from these sources, but it can be quickly converted to nitrogen dioxide (NO<sub>2</sub>) by reaction with ozone (O<sub>3</sub>) in the atmosphere. Natural sources of SO<sub>2</sub> in the troposphere include volcanic eruptions and the atmospheric oxidation of dimethyl sulfide (DMS: CH<sub>3</sub>SCH<sub>3</sub>) emitted from the ocean (Dentener et al., 2006). HCHO in the remote atmosphere is produced through the oxidation of methane (CH<sub>4</sub>) and non-methane volatile organic compounds (NMVOCs), and it is also emitted from anthropogenic combustion processes, biomass burning and natural vegetation (Stavrakou et al., 2009).

Global emissions and atmospheric abundance of gaseous pollutants (e.g., NO<sub>x</sub> and SO<sub>2</sub>) and aerosols have changed significantly over the past few decades as revealed predominantly by satellite observations (e.g., De Smedt et al., 2015;Xing et al., 2015;Bauwens et al., 2016;Fioletov et al., 2016;Krotkov et al., 2016;Klimont et al., 2017;Li et al., 2017;Georgoulias et al., 2018;Hammer et al., 2018;Ziemke et al., 2018). Worldwide ground-based monitoring the concentrations and trends of trace gases and aerosols in the atmosphere is essential for the validation of and filling gaps in satellite observations, in order to quantitatively assess the impacts of atmospheric composition change on global air quality and climate changes (Stohl et al., 2015;De Mazière et al., 2018). The international global measurement networks have been set up sequentially over the past decades to establish long-term databases for detecting changes and trends in the chemical and physical state of the atmosphere. Among the networks are the Global Atmosphere Watch (GAW) program of the World Meteorological Organization (WMO) and the Network for the Detection of Atmospheric Composition Change (NDACC), and in the latter measurements are performed mainly by ground-based remote-sensing techniques (De Mazière et al., 2018). In contrast to Europe and North America, the stations under the networks in Asia, especially in the remote areas, are very sparse.

The China Global Atmosphere Watch Baseline Observatory at Mt. Waliguan (WLG) is an in-land GAW baseline station affiliated to WMO. The site (3816 m a.s.l.), located at the northeastern part of the Tibetan plateau, is representative of the pristine atmosphere over the Eurasian continent. Air masses at WLG are highly representative of the remote free troposphere (Ma et al., 2002a). Previous model simulations constrained by measured mixing ratios of ozone and its precursors indicated a net destruction of ozone at WLG in the summertime of 1996 (Ma et al., 2002a). In contrast, new insights from model calculations based on more recent measurements showed that ozone was net produced by in situ photochemistry at WLG in late spring and summer of 2003 (Xue et al., 2013). The level of NO<sub>x</sub> plays a key role in determining the sign of net ozone production in the remote troposphere. However, it is not determined if the difference in the estimated net ozone production at WLG between the two studies is caused by increasing NO<sub>x</sub> from 1996 to 2003 or by the uncertainties in the measurements of NO<sub>x</sub>. Similar to the earliest measurement of NO<sub>2</sub>, SO<sub>2</sub>, HCHO and other reactive gases were also measured by filter or canister sampling method at WLG at irregular time (Mu et al., 2007;Meng et al., 2010;Lin et al., 2013). It is necessary to start a new measurement program with advanced technique at WLG for the purpose of precisely monitoring the levels and trends of atmospheric composition in the global pristine atmosphere.

The multi-axis differential optical absorption spectroscopy (MAX-DOAS) has the potential to retrieve the vertical distributions of trace gases and aerosols in the immediate vicinity of the station from the scattered sunlight measured at multiple elevation angles (Hönninger and Platt, 2002;Bobrowski et al., 2003;Van Roozendaal et al., 2003;Hönninger et al.,

2004;Wittrock et al., 2004). As relatively simple and cheap ground-based instrumentation, the UV-visible MAX-DOAS will be included in the certified NDACC measurement technique for the observation of lower-tropospheric NO<sub>2</sub>, HCHO and O<sub>3</sub> (De Mazière et al., 2018). Successful measurement and retrieval of trace gases (e.g., NO<sub>2</sub>, SO<sub>2</sub> and HCHO) depend on various factors, including their molecular absorption features and atmospheric abundances as well as the atmospheric visibility and instrumental signal/noise ratio. In contrast to extensive ground-based measurements of NO<sub>2</sub>, SO<sub>2</sub> and HCHO in rural and urban areas worldwide, including highly polluted areas in eastern China (e.g., Ma et al., 2013;Hendrick et al., 2014;Wang et al., 2014;Jin et al., 2016;Wang et al., 2017), measurements of these trace gases by MAX-DOAS in the remote background areas have been very sparse (Gomez et al., 2014;Gil-Ojeda et al., 2015;Schreier et al., 2016). Gomez et al. (2014) proposed a modified geometrical approach (MGA) to estimate long-path-averaged mixing ratios of trace gases from mountain MAX-DOAS measurements. A NO<sub>2</sub> level of 20 ppt, which is below the detection limit of the in situ instrumentation, was observed (Gomez et al., 2014). The MAX-DOAS technique has been applied to monitor the absolute column densities and plumes of SO<sub>2</sub> from large volcano eruptions (e.g., Lübcke et al., 2016;Tulet et al., 2017), but measuring SO<sub>2</sub> in the background free troposphere still remains challenging.

Bromine oxide (BrO) plays an important role in the catalytic destruction of ozone in the remote troposphere (Platt and Hönninger, 2003;von Glasow and Crutzen, 2007). The earliest MAX-DOAS measurements were focused on the retrieval of the mixing ratio levels and vertical profiles of BrO in the boundary layer of the Arctic, salt lake and marine areas (Hönninger and Platt, 2002;Stutz et al., 2002;Leser et al., 2003;Frieß et al., 2004;Saiz-Lopez et al., 2004). Measurement results showed that the BrO mixing ratio could reach up to 30 ppt in the Arctic and 10 ppt in the marine boundary layer (Platt and Hönninger, 2003;Martin et al., 2009). BrO in the free troposphere at the global scale was estimated to be at a level of 0.5–2 ppt based on space-borne, ground-based and sounding measurements by DOAS technique (Harder et al., 1998;Fitzenberger et al., 2000;Richter et al., 2002;Van Roozendaal et al., 2002;Hendrick et al., 2007;Theys et al., 2007;Werner et al., 2017). Model calculations indicated that inorganic bromine can influence the chemical budgets of ozone in the free troposphere to a considerable extent, reducing O<sub>3</sub> concentration locally by up to 40% (von Glasow et al., 2004;Lary, 2005;Yang et al., 2005;Yang et al., 2010). Until now, measurements of BrO and related species by ground-based MAX-DOAS have been frequently carried out in the Arctic (Peterson et al., 2015;Peterson et al., 2017;Simpson et al., 2017;Luo et al., 2018), Antarctic (Wagner et al., 2007b;Roscoe et al., 2012;Prados-Roman et al., 2018) and coastal atmosphere (Coburn et al., 2011). To our knowledge, no MAX-DOAS measurements have been reported for BrO on continents other than polar, salt lake and coastal areas.

We made long-term ground-based MAX-DOAS measurements at WLG during the period 2012–2015. For this study we analyzed the measured spectra to retrieve the free tropospheric background mixing ratios of different trace gases, including NO<sub>2</sub>, SO<sub>2</sub>, HCHO and BrO, from MAX-DOAS measurements at WLG. Large effort was spent on the spectral analysis, because in spite of the rather long atmospheric light paths at high altitude the respective trace gas absorptions are close to or below the detection limit. In Sect. 2, we give a description of the WLG measurement site, the meteorological conditions, and the MAX-DOAS instrument used in the study. Sect. 3 describes the method and settings we used in the spectral retrieval. Sect. 4 introduces the radiative transfer simulations we performed for in-depth analysis of measurement data. Sect. 5 describes the methods to filter the measurement data for the clear sky and low aerosol load conditions. In Sect. 6, we provide the differential slant column density values of the investigated trace gases and their corresponding tropospheric background mixing ratios over WLG, and compare the levels of these trace gases reported by different studies. Conclusions are given in Sect. 7.

## 2 Field experiment

### 2.1 WLG station

The WLG station is sited at the top of Mt. Waliguan (36°17'N, 100°54'E, 3816 m a.s.l.), located in Qinghai Province of China (Fig. 1a). It is one of the WMO/GAW global baseline stations and only one in the hinterland of the Eurasian continent. Mt. Waliguan is an isolated mountain with an elevation of about 600 m relative to the surrounding landmass, being surrounded by highland steppes, tundra, deserts, and salt lakes (Fig. 1b). With a low population density of about 6 capitals km<sup>-2</sup> and hardly any industry within 30 km, WLG has the advantage to be rather isolated from industry, forest and population centers. It is relatively dry, windy and short of precipitation with a typical continental plateau climate (Tang et al., 1995). Xining City (the capital of Qinghai Province, located about 90 km northeast of WLG) and Lanzhou City (the capital of Gansu Province, located about 260 km away to its east) are considered as the nearest large pollution sources that may have impacts on the WLG site. There are several high mountains (~4000 m a.s.l.) between Xining and Mt. Waliguan. Total column ozone, surface ozone, solar radiation, precipitation chemistry, greenhouse gases, aerosol optical depth, and aerosol scattering/absorption coefficient together with basic meteorological parameters have become operational measurement items at WLG in succession since the year 1991 (Tang et al., 1995). In addition to routine observations, intensive measurements and model analyses were performed to investigate the regional/global representativeness of WLG and the effects of chemical transformations, physical and transport processes on various atmospheric compositions, e.g., surface ozone, short-lifetime reactive gases (such as NO, NO<sub>2</sub>, SO<sub>2</sub>, CO, H<sub>2</sub>O<sub>2</sub>, HNO<sub>3</sub>, HCHO, other carbonyls, and non-methane hydrocarbons (NMHCs)), greenhouse gases, persistent organic pollutants, metal and isotopes, and aerosols.

### 2.2 Meteorological conditions

We used the European Centre for Medium-Range Weather Forecasts (ECMWF) re-analysis data to investigate meteorological conditions over the WLG site, with data for 3-4 km altitude representing the ground level at WLG. As shown in Fig. S1, temperature is high in summer (around 283K) and low in winter (around 265K), pressure is high in summer (around 643 hPa) and low in winter (around 635 hPa), wind speed is low in summer (around 3m/s) and high in winter (around 5m/s), and wind direction (0 means the wind is blowing from the North) is from south-east in summer (around 140 °) and from west in winter (around 260 °). These seasonal variation characteristics are similar to those in earlier years at the station as reported in previous work (Tang et al., 1995). We evaluated the ECMWF reanalysis data for 3-4 km altitude using meteorological data from in situ measurements at the WLG station, and found that the ECMWF data are in good (temperature, pressure) and reasonable (wind speed and direction) agreement with in situ data (see Fig. S2).

### 2.3 MAX-DOAS instrument

We started the ground-based MAX-DOAS measurement program at WLG on 26 September 2010. An automated and compact (13 cm × 19 cm × 14 cm) Mini MAX-DOAS instrument from Hoffmann Messtechnik GmbH in Germany, which had ever been used at the Gucheng site in the North China Plain (Jin et al., 2016), was moved to and installed at WLG (Fig. 1c). This instrument is designed for the spectral analysis of scattered sunlight and the application of the MAX-DOAS technique (Hönninger et al., 2004). The same type of instrument was used in previous studies, e.g. in Beijing and the surrounding area (Ma et al., 2013; Jin et al., 2016). The entrance optics, fiber coupled spectrograph and controlling electronics are hermetically



sealed in a metal box of about 3 liter volume. A stepper motor, mounted outside the box, can rotate the whole instrument to control the elevation viewing angle, i.e., the angle between the horizontal and the viewing direction, and thus it can scan vertically at different elevation angles. The spectrograph covers a wavelength range of 290-437 nm and its entrance slit has a width of 50  $\mu\text{m}$ . A Sony ILX511 charged coupled device (CCD) detects the light in 2048 individual pixels. The whole spectrograph is cooled by a Peltier stage to maintain a stable temperature of the optical setup and to guarantee a small dark current signal. The measurement process and spectra data logging are controlled by a laptop using the MiniMAX software package developed by Dr. Udo Frie $\beta$  at the Institute of Environmental Physics, the University of Heidelberg in Germany.

The instrument was mounted on a bracket, fixed at the building roof, at an azimuth viewing direction exactly towards the north. After a winter of pilot run, we added heating elements to the outside of the instrument so that the temperature of the spectrograph could be kept at a stable but not very low value, e.g., -10  $^{\circ}\text{C}$  in winter. In other seasons, the temperature of the optical setup was set at a higher value, typically of 0  $^{\circ}\text{C}$ , below the ambient temperature. Dark current spectra were measured using 10000 msec and 1 scan, and electronic offset spectra with 3 msec and 1000 scans. Measurements of these signal spectra were made generally month by month or whenever the working temperature of the instrument was changed. Over the pilot run period in the years 2010 and 2011, measurements had been made with the same sequence of elevation angles as used at the Gucheng site in the North China Plain (Jin et al., 2016), with no elevation angles lower than 3 $^{\circ}$  available. After the beginning of the year 2012, the elevation angles were set to be -1 $^{\circ}$ , 0 $^{\circ}$ , 1 $^{\circ}$ , 2 $^{\circ}$ , 3 $^{\circ}$ , 5 $^{\circ}$ , 10 $^{\circ}$ , 20 $^{\circ}$ , 30 $^{\circ}$ , and 90 $^{\circ}$  in a sequence. Unfortunately, during the data analysis it turned out that the elevation calibration was wrong by -4 $^{\circ}$  (see Fig. S3). Thus finally only a few elevation angles from the original selection were found to be above the horizon. After the correction by -4 $^{\circ}$  the remaining elevation angles are: 1 $^{\circ}$ , 6 $^{\circ}$ , 16 $^{\circ}$ , 26 $^{\circ}$ , and 86 $^{\circ}$ . The exposure time for each elevation angle was about one minute. The data from three years of measurements over the period April 2012 through April 2015 are used for this study.

### 3 Spectral retrieval

At the WLG site the atmospheric trace gas absorptions are usually rather low. Thus the settings of the spectral analysis were optimised for low detection limits. In general this can be achieved by

- a) co-adding of individual spectra,
- b) using rather broad spectral ranges,
- c) selecting only spectra of high signal to noise ratio.

Since at the WLG station different detector temperatures were used for different time periods, the spectral analysis was performed with different spectral calibrations (and corresponding sets of convoluted cross sections) for each of these periods. Besides that, the spectral analysis was carried out with consistent settings for the different periods. In order to limit the amount of work, only 'long periods' that contained at least 60 measurement days were selected for the data analysis (see Table S1).

In order to achieve a large reduction of the statistical error, as much as possible individual spectra should be averaged. However, systematic errors tend to increase if an increasing number of spectra are averaged. In this study we performed the analysis of spectra averaged from 10 original spectra, for which a minimum of the fit error was found (see Fig. S4). In this study individual measurements at 26 $^{\circ}$  elevation of each elevation sequence are used as Fraunhofer reference spectra, for the reasons explained in Supplement Sect. 3.2.

The spectral ranges for the retrieval of the different trace gases were determined in dedicated sensitivity studies (see Supplement Sect. 3.3). Examples of the spectral analyses are shown in Fig. 2. The errors of the retrieved differential slant



column densities (dSCDs) of the trace gas were also estimated based on the sensitivity studies described in [Supplement Sect. 3.3](#). [Table 1](#) summarizes the spectral fitting ranges and systematic and random errors for the retrieved trace gas dSCDs. For all trace gases, the overall error for individual measurements (averages of 10 original spectra) is dominated by random errors. These errors, however, become much smaller if a large number of measurements are averaged.

## 5 4 Radiative transfer simulations

Similar to [Gomez et al. \(2014\)](#), we use the dSCDs from MAX-DOAS measurements to estimate the mixing ratios of NO<sub>2</sub>, SO<sub>2</sub>, HCHO, and BrO at WLG in this study. The relationships between the dSCDs and mixing ratios of these different trace gases are set up by radiative transfer simulations using the radiative transfer model TRACY-2 ([Wagner et al., 2007a](#)). This model allows to explicitly consider the variation of the topography around the measurement station. This option was, however, only used in one dimension (in viewing direction) in order to minimise the computational effort. The variation of the surface terrain height and the results of the radiative transfer simulations are illustrated in [Fig. 3](#).

As a side aspect of our study, we also investigated the effect of different choices of the topography. In addition to the set-up with the ‘true’ topography ([Fig. 3](#)), we also performed simulations with flat surfaces at sea level or 3700m altitude. In all three set-ups the atmospheric properties and the altitude of the detector (3800m) are kept the same. In [Fig. 4](#) the O<sub>4</sub> AMFs for the simulations with flat surfaces are plotted versus the O<sub>4</sub> AMFs for the true surface topography. While the results for a flat surface at 3700m are very similar to those for the true topography, the results for a flat surface at sea level show systematically higher values. With increasing aerosol load these differences even increase. In [Fig. 5](#) the dependence of the simulated radiance (top) O<sub>4</sub> AMF (center) and colour index (bottom) are shown as function of the elevation angle (including negative elevation angles). Again, the results for the true topography and the flat surface at 3700m altitude are very similar, while the results for a flat surface at sea level are systematically different. The results of these comparisons indicate that the assumption of a flat surface at the approximate altitude of the surrounding terrain is a very good approximation for the true surface topography. Only for zero and negative elevation angles, the consideration of the true topography might become important.

The surface albedo was set to be 7.5%. Sensitivity studies indicated that the exact choice is not critical: [Simulations with high surface albedo representative for snow surfaces yielded almost the same results. This finding can be understood by the fact that the measurements and the Fraunhofer reference spectra are affected by changes of the surface albedo in the same way. Thus, for the retrieved dSCDs the effect of the surface albedo cancels out.](#) The aerosol extinction was varied, but was assumed to be constant between 2600 and 5600m altitude. Different aerosol loads (AOD between 0 and 0.5) were assumed. Here it should be noted that only a fraction of 60% of the total AOD is located above the instrument.

Simulations of trace gas air mass factors (AMFs) were performed for specific viewing geometries for a whole diurnal cycle in January and July. These months were chosen, because they represent the most extreme viewing geometries (winter and summer) during the whole year. From the derived diurnal variations of the trace gas AMFs, daily averages for measurements with SZA below 65° were calculated. For these calculations the individual AMFs were weighted by the corresponding simulated intensities. Finally, the simulated AMFs for 26° elevation angle were subtracted from the AMFs for the lower elevation angles yielding the respective differential AMFs (dAMFs). This procedure was applied in order to calculate trace gas dAMFs which can be directly compared to the trace gas dSCDs derived from the measurements.

In order to relate the measured trace gas dSCDs to atmospheric trace gas mixing ratios, assumptions about the vertical distributions of the trace gases have to be made. The assumed trace gas profiles are described in [Supplement Sect. 4](#). Two types of input profiles are used: For the first group of trace gases, the influence of the stratospheric absorptions can be

neglected. This is the case for SO<sub>2</sub> and HCHO, for which the stratospheric amounts (except for strong volcanic eruptions) are very small and can be neglected. Although for NO<sub>2</sub>, the contribution from the stratospheric absorption can be rather large, it is found that the stratospheric NO<sub>2</sub> absorptions are very similar for the different elevation angles (see [Supplement Sect. 5.1](#)), and the stratospheric absorptions almost completely cancel out for the derived trace gas dSCDs using sequential Fraunhofer reference spectra. Thus, the tropospheric partial dSCD can be simulated independently from the stratospheric absorptions and can be directly compared to the measured NO<sub>2</sub> dSCDs.

For BrO, the situation is different: since the stratospheric BrO profile is located at rather low altitudes, the corresponding absorptions depend substantially on the elevation angle. Thus they don't cancel out in the retrieved BrO dSCDs. In fact, the dSCDs for low elevation angles even can become negative (see [Supplement Sect. 5.2](#)) due to the stratospheric BrO absorptions. Therefore, for BrO the stratospheric and tropospheric profiles of BrO have always to be considered simultaneously in the radiative transfer simulations.

From the simulations results for 1° elevation angle (and low aerosol load: AOD = 0.1) approximate relationships between the trace gas dSCDs (at 1° elevation angle) and the corresponding volume mixing ratios are derived. They are given below for the different trace gases:

- SO<sub>2</sub>: a dSCD of  $1 \times 10^{15}$  molec/cm<sup>2</sup> corresponds to a mixing ratio of 60 ppt,
- NO<sub>2</sub>: a dSCD of  $1 \times 10^{15}$  molec/cm<sup>2</sup> corresponds to a mixing ratio of 23 ppt,
- HCHO: a dSCD of  $1 \times 10^{15}$  molec/cm<sup>2</sup> corresponds to a mixing ratio of 42 ppt,
- BrO: a dSCD of  $1 \times 10^{13}$  molec/cm<sup>2</sup> corresponds to a mixing ratio of 0.6 ppt.

Here it should be noted that for BrO the relationship is valid for the increase of the BrO dSCD compared to a scenario with no BrO in the troposphere (see [Supplement Sect. 5.2](#) and [Fig. S23](#)). It should also be noted that while in the simulations a constant mixing ratio throughout the atmosphere was assumed, the measured trace gas dSCDs are mainly sensitive to the trace gas concentrations in the atmospheric layers close to the instrument. Thus the derived trace gas mixing ratios are most representative for the free troposphere in the altitude range between about 4 and 5 km.

## 5 Identification of measurements made under cloudy sky conditions and high aerosol loads

For the quantitative interpretation of the measurements, they are compared to results from radiative transfer simulations. These simulations are performed for well defined, in particular cloud-free conditions. Thus only measurements for such conditions have to be selected. Moreover, to make benefit of the high sensitivity of the MAX-DOAS measurements, situations with low aerosol load and thus high visibility have to be selected. The following two sub-sections describe how measurements under cloudy conditions and high aerosol loads are identified.

### 5.1 Cloud filter

Cloudy sky conditions can be identified and classified by different quantities (see e.g. Gielen et al., 2014; Wagner et al., 2014; Wagner et al., 2016). In this study, to minimise the computational effort, we only use the colour index (CI) measured in zenith direction ([note that the measurements in zenith direction were not used for trace gas retrievals because of suspected direct sun impact](#)). We chose the wavelength pair 330 nm and 390 nm:

$$CI = \frac{signal(330nm)}{signal(390nm)} \quad (1)$$

Moreover, in order to minimise the potential effects of instrument degradation, not the absolute value of the CI is used for the cloud classification. Instead, two derived quantities are calculated:

5

### 1) The temporal smoothness indicator (TSI)

The TSI is derived from the zenith measurements. If the CI between subsequent zenith measurements changes rapidly, this indicates the presence of clouds. The TSI is calculated according to the following formula:

10

$$TSI_i = \left| \frac{CI_{i-1} - CI_{i+1}}{2} - CI_i \right| \quad (2)$$

Here i indicates the number of an elevation sequence. For clear sky (and homogenous cloud cover) the TSI is small. For broken clouds the TSI is large.

### 15 2) The spread (SP) of the CI for one elevation sequence

The SP is calculated as the difference between the maximum and minimum of the CI for a selected elevation sequence:

$$SP_i = \max(CI_i) - \min(CI_i) \quad (3)$$

20

Here  $\max(CI_i)$  and  $\min(CI_i)$  indicate the maximum and minimum CI of the considered elevation sequence. For clear sky, the SP is large, for (homogenous) clouds the SP is low.

Based on the calculated TSI and SP the cloud situation of an individual elevation sequence is classified as clear sky, broken clouds or continuous clouds according to the following thresholds:

25

- a) Clear sky: TSI < 0.012 and SP > 0.15,
- b) Broken clouds: TSI > 0.012,
- c) Continuous clouds: TSI < 0.012 and SP < 0.15.

Note: for cases a) and c) both TSI (at the beginning and the end of the elevation sequence) have to be < 0.012); for case b) the condition is fulfilled if one of both TSI is > 0.012.

### 30 5.2 Aerosol filter

For the low elevation angles the atmospheric visibility and thus the length of the light path depends strongly on the aerosol load. Thus measurements with high aerosol loads have decreased sensitivity to the trace gas absorptions and have thus to be identified and removed from further processing. For that purpose the retrieved O<sub>4</sub> absorption is used (Wagner et al.,

2004;Lampel et al., 2018). In the following a threshold for the retrieved O<sub>4</sub> dSCD at 1 ° elevation angle of  $1.4 \times 10^{43}$  molec  $\text{cm}^2$  is used, which corresponds to an O<sub>4</sub> dAMF of 1.2 (see Fig. S26). This threshold represents an AOD of about 0.1 at 360 nm.

5 In Fig. S27 the seasonal variation of the O<sub>4</sub> dSCDs at 1 ° elevation is shown. High values are typically found in winter indicating low AOD. In other seasons smaller O<sub>4</sub> dSCDs are found indicating higher AOD. This seasonal dependence is in good agreement with measurements of the AOD (Che et al., 2011).

### 5.3 Summary of sky conditions

10 In Fig. 6 the seasonal variation of the sky conditions is shown. It is derived by applying the cloud and aerosol classification algorithms described above. The statistics is based on the number of observations (at 1 °, 6 °, or 16 ° elevation angle) of spectra averaged from 10 original spectra (April 2012 – April 2015). Only measurements with more than 800 scans are considered. The basic colours indicate the cloud properties (clear, broken clouds, continuous clouds). The full or light colours indicate observations with low or high aerosol loads, respectively.

15 While the absolute frequency of clear sky observations (low and high aerosol load) stays almost constant over the year, the relative fraction changes strongly with the highest probability of clear sky observations in winter and the lowest probability in summer. The relative fraction of low aerosol cases is largest in winter. The corresponding seasonal frequency plots for the different trace gas analyses (after application of the individual RMS filters) are shown in Fig. S28. While the absolute amount of valid data is different for the different analyses, the seasonal frequency is almost the same.

## 6 Results

### 20 6.1 Seasonal means of the dSCDs

In Fig. 7 (left) time series of daily averages of the individual trace gas dSCDs for 1 ° elevation angle are shown. On the right side, the corresponding monthly mean values are shown. In Fig. 8 the seasonal cycles for all elevation angles (1 °, 6 °, 16 °) are shown for clear sky. In this figure, also the systematic uncertainties of the trace gas dSCDs are indicated by the blue dotted lines. The systematic uncertainties can be regarded as indicators for the lower bounds of the detection limit (which might be reached if a large amount of measurements is averaged). For NO<sub>2</sub>, SO<sub>2</sub>, and HCHO, also approximate mixing ratios derived for the measurements at 1 ° elevation angles are indicated by the y-axes at the right side (see Sect. 4). The results for broken clouds are similar to those for clear sky (see Fig. S29). This is a useful information to confirm the results for clear sky, since for broken clouds, the atmospheric light paths are often similar to those for clear sky.

The main findings are:

- 30 i) For NO<sub>2</sub> and HCHO higher dSCDs are found for lower elevation angles, and this indicates enhanced trace gas mixing ratios in the troposphere (at least in the atmospheric layers between about 4 and 5km);
- ii) the highest NO<sub>2</sub> values are found in a period from April to June, most likely due to the influence of long range transport of NO<sub>2</sub> and its reservoir from both human and natural sources (Ma et al., 2002b;Wang et al., 2006)
- 35 iii) for BrO the opposite dependence is found, and this is mainly caused by the influence of stratospheric BrO (see Supplement Sect. 5.2);
- iv) for SO<sub>2</sub> no clear elevation dependence is found (the values are below detection limit).

## 6.2 Estimation of a free tropospheric background mixing ratio from the dSCDs

In this section the lower tropospheric mixing ratios of the NO<sub>2</sub>, SO<sub>2</sub>, HCHO, and BrO at WLG are estimated based on the respective dSCDs at 1 ° (see Fig. 8) and the relationships between the dSCDs and the tropospheric mixing ratios (Sect. 4).

Below are our estimates:

5 **NO<sub>2</sub>**: dSCDs at 1 ° between  $0.2 \times 10^{15}$  molec/cm<sup>2</sup> (January) and  $3 \times 10^{15}$  molec/cm<sup>2</sup> (May) correspond to mixing ratios between about 5 (January) and 70 ppt (May).

**SO<sub>2</sub>**: dSCDs at 1 ° below  $8 \times 10^{15}$  molec/cm<sup>2</sup> correspond to mixing ratios below 0.5 ppb,

**HCHO**: dSCDs at 1 ° between  $0.7 \times 10^{15}$  molec/cm<sup>2</sup> (winter) and  $1.7 \times 10^{15}$  molec/cm<sup>2</sup> (summer) correspond to mixing ratios between about 0.3 (winter) and 0.7 ppb (summer),

10 **BrO**: from the dSCDs at 1 ° an upper limit for a troposphere BrO mixing ratio 0.3 ppt is derived (see Supplement Sect. 8).

It should again be noted that while in the simulations a constant mixing ratio throughout the atmosphere was assumed, the measured trace gas dSCDs are mainly sensitive to the trace gas concentrations in the atmospheric layers close to the instrument. Thus the derived trace gas mixing ratios are most representative for the free troposphere in the altitude range between about 4 and 5 km.

## 15 6.3 Comparisons with previous studies

Measurements of the very reactive trace gases are very scarce at remote sites like WLG. Table 2 summarizes the mixing ratios of NO<sub>2</sub>, SO<sub>2</sub>, HCHO and BrO at WLG measured by MAX-DOAS presented in this study in comparison to those recorded in other studies using different methods.

The passive sampling method was used to measure the weekly and monthly mean mixing ratios of NO<sub>2</sub> and SO<sub>2</sub> at WLG (Ma et al., 2002a; Meng et al., 2010; Lin et al., 2013). The monthly mean mixing ratios and standard deviations of NO<sub>2</sub> at WLG were  $0.022 \pm 0.010$  ppb in January and  $48 \pm 17$  ppt in July for the year 1996 (Ma et al., 2002a). For the measurement in 1996, the NO<sub>2</sub> was sampled with filter packs (SP) with exposure times of typically 3–5 days, and then analyzed by ion chromatography equipment (ICG) (Yu et al., 1997). During the measurement experiment in 2008, the samplers were exposed about 10 days in a month. The extracted NO<sub>2</sub> samples (Ogawa Passive Samplers) were analyzed using a spectrophotometer (SPM) while the extracted SO<sub>2</sub> samples were analyzed by ICG (Meng et al., 2010). The average mixing ratios of NO<sub>2</sub> and SO<sub>2</sub> at WLG in 2008 varied typically in the ranges of  $0.6 \pm 0.4$  ppb and  $0.7 \pm 0.4$  ppb, respectively (Meng et al., 2010). Long-term continuous measurements, by filter sampling with exposure times of 3–5 days followed by ICG chemical analysis, showed that the mixing ratio of SO<sub>2</sub> varied typically in a range of  $0.45 \pm 0.14$  ppb at WLG from 1997 to 2009 (Lin et al., 2013). The NO<sub>2</sub> levels obtained from this study are in accordance with those recorded by Ma et al. (2002a), but an order of magnitude lower than reported by Meng et al. (2010). The time differences between Meng et al. (2010) and the other two studies seems not to be the main cause. The sampling filters were likely to be polluted by local human activities, such as increasing frequency of occasional cars and vans to the station, which could not be excluded from the recording due to their long exposure time. The level of SO<sub>2</sub> might also be overestimated by Meng et al. (2010) considering that there had not been a significant increasing trend for SO<sub>2</sub> at WLG during 1997–2009 (Lin et al., 2013). It can be deduced that the SO<sub>2</sub> level from this study is reasonable with comparison to the results from Lin et al. (2013).

The daytime NO and NO<sub>2</sub> mixing ratios at WLG in the summer of 2006 were  $71 \pm 45$  ppt and  $0.28 \pm 0.13$  ppb, respectively, as measured by chemiluminescence analyzer (CLS) coupled with a photolytic converter (PhC) (Xue et al., 2011). Also measured by CLS, the daytime average NO mixing ratios at WLG were  $0.072 \pm 0.079$  ppb in the late spring and  $0.047 \pm 0.032$

ppb in the summer of 2003 (Wang et al., 2006;Xue et al., 2013). Assuming the same NO<sub>2</sub>/NO ratio (i.e., 3.9) as in the summer of 2006, the NO<sub>2</sub> mixing ratios at WLG would be 0.28±0.31 ppb in the late spring and 0.18±0.12 ppb in the summer of 2003. The NO<sub>2</sub> levels obtained from the CLS method are much higher than those from MAX-DOAS presented in this study. This can be explained by two facts: (1) There are systematic biases in the NO<sub>2</sub> mixing ratios derived by the CLS/PhC method due to the interferences from other oxidation products, such as nitric acid and organic nitrate, which are accounted as NO<sub>2</sub>; (2) In situ measurements at WLG are strongly influenced during the daytime by the underlying boundary layer, where NO<sub>2</sub> levels are high due to soil emissions and other occasional pollution sources. In contrast, the upwelling air masses have a relative small influence on the MAXDOAS measurements, which represent a long optical path.

The ambient concentrations of carbonyl compounds were measured at WLG in 2005, by using the silica gel cartridge/high-performance liquid chromatography (SGC/HPLC) method. The means and standard deviations of HCHO mixing ratios were 4.16±1.89 ppb in August-September and 1.48±0.42 ppb in December (Mu et al., 2007). The HCHO mixing ratios obtained by the SGC/HPLC method are nearly an order of magnitude higher than those by MAX-DOAS presented in this study. Mu et al. (2007) reported that the variability of HCHO concentrations was significant (by a factor of >2) if the air samples were collected at different places at the site. However, this cannot fully explain the large difference in the HCHO level at WLG between the two studies. Since HCHO forms through various oxidation reactions associated with volatile organics, the results from HPLC might not be well representative of air conditions under which the air samples had been collected some days ago.

Also listed in Table 2 are the levels of NO<sub>2</sub>, HCHO and BrO measured by MAX-DOAS in other remote areas at middle and subtropical latitudes. Note that to our knowledge, no results for SO<sub>2</sub> were reported in those studies. Our purpose here is to show what low levels of these gases, BrO in particular, had been detected by MAX-DOAS in these remote regions.

Gomez et al. (2014) retrieved the gas concentrations at a very long horizontal path of over 60 km from high mountain MAX-DOAS measurements at the Izaña Atmospheric observatory (28°18'N, 16°29'W, 2373 m a.s.l.) on the Canary Islands using the modified geometrical approach (MGA). The NO<sub>2</sub> mixing ratios were within the range of 20–40 ppt in the summer of 2011 (Gomez et al., 2014). Gil-Ojeda et al. (2015) applied the same technique to a longer data set obtained at the same station, and showed that the free tropospheric NO<sub>2</sub> mixing ratios varied in the range of 20–45 ppt between 2011 and 2013, with the lowest values in winter and highest values in summer. MAX-DOAS measurements were also performed at Zugspitze, Germany (47.5°N, 11°E, 2650 m a.s.l.) during February–July 2003 and Pico Espejo, Venezuela (8.5°N, 71°W, 4765 m a.s.l.) from March 2004 to February 2009. Based on the MGA method, the monthly mean mixing ratios of free tropospheric NO<sub>2</sub> were estimated to be in the range 60–100 ppt at Zugspitze and 8.5–15.5 ppt at Pico Espejo. The values for HCHO were in the range 500–950 ppt at Zugspitze and 255–385 ppt at Pico Espejo, respectively (Schreier et al., 2016).

BrO was detected directly in the mid-latitude marine environment for the first time, in the region north of the Canary Islands (around 35°N, 13°W), when a research cruise including ship MAX-DOAS (SMAX-DOAS) measurements was carried out over the Atlantic Ocean in October 2000 (Leser et al., 2003). Typical levels of BrO in the marine lower troposphere were <1 to 3.6 ppt in most cases, and upper limits of NO<sub>2</sub> for clean air in the Atlantic west of Africa was observed to be 24 to 100 ppt (Leser et al., 2003). BrO was measured by long-path MAX-DOAS (LP-MAX-DOAS) at the Mace Head observatory on the west coast of Ireland (53°20' N, 9°54' W) in August 2002. The BrO mixing ratios were shown to vary from below the detection limit (0.8 ppt) at night, to a maximum daytime concentration of 6.5 ppt, indicating that significant bromine activation occurs over the open ocean (Saiz-Lopez et al., 2004). Tropospheric BrO profiles over the remote Atlantic were obtained by aircraft/ship-based MAX-DOAS measurements by Volkamer et al. (2015). In the marine boundary layer (MBL) mixing ratios close to zero were obtained, which increase with altitude in the free troposphere. In the middle troposphere

mixing ratios up to 1 ppt were found. Fitzenberger et al. (2000) derived BrO profiles from balloon borne measurements in Kiruna (Sweden) with mixing ratios up to about 1 ppt in the free troposphere.

5 It can be seen that the levels of NO<sub>2</sub> at WLG derived from this study are comparable to those measured by MAX-DOAS in other remote areas. However, the upper limit for the free tropospheric mixing ratios of BrO at WLG (about 0.3 ppt) derived from this study is lower than those observed under the MBL conditions at the same latitude band.

## 7 Conclusions

We made long-term ground-based MAX-DOAS measurements at the WLG WMO/GAW global baseline station during the period 2012–2015. For this study we analyzed the measured spectra to estimate the tropospheric background mixing ratios of different trace gases, including NO<sub>2</sub>, SO<sub>2</sub>, HCHO and BrO, from MAX-DOAS measurements at WLG.

10 For the spectral retrieval, we find that averaging of spectra increases the signal to noise ratio and thus reduces the statistical error of the spectral retrieval on one hand, and systematic errors caused by imperfect correction of the Ring effect tend to increase if an increasing number of spectra is averaged on other hand. Averages of 10 original spectra have been approved to be an ‘optimum option’ in the spectral analysis for this study. We determined the settings and spectral ranges for the retrieval of the different trace gases by a large number of dedicated sensitivity studies. We performed radiative transfer  
15 simulations with the RTM TRACY-2, which allows to explicitly consider the variation of the topography around the measurement station in viewing direction. From the simulations results, approximate relationships between the trace gas dSCDs (at 1 ° elevation angle and low aerosol load: AOD = 0.1) and the corresponding volume mixing ratios are derived. We used the temporal variation and the spread of the colour index (CI) derived from our MAX-DOAS measurements to select measurement data for clear sky and low aerosol load, and then retrieved the corresponding daily averages and seasonal cycles  
20 of the trace gas dSCDs at elevation angles of 1 °, 6 °, 16 °.

For NO<sub>2</sub> and HCHO higher dSCDs are found for lower elevation angles than for higher elevation angles, indicating enhanced trace gas mixing ratios in the lower troposphere over WLG. For BrO the opposite dependence is found, reflecting the influence of stratospheric BrO. For SO<sub>2</sub> no clear elevation dependence is found. The highest NO<sub>2</sub> dSCDs are found in a period from April to June, most likely due to the long range transport of NO<sub>2</sub> and its reservoirs to WLG. From the dSCDs at 1 °  
25 elevation, mixing ratios of NO<sub>2</sub> in the lower troposphere over WLG are estimated to be between about 5 ppt (January) and 70 ppt (May), and mixing ratios of SO<sub>2</sub> fall below 0.5 ppb. Mixing ratios of HCHO range between about 0.3 (winter) and 0.7 ppb (summer). These mixing ratios are most representative for atmospheric layers between about 4 and 5 km. Mixing ratios of BrO are estimated to be smaller than 0.3 ppt. Retrieving BrO in the continental background troposphere remains a challenge, which should be further addressed in future studies.

## 30 Data availability

The spectral analysis and RTM simulation results here are available upon request.



## Author contributions

JM and TW designed the study. JM, JJ, JG, ZZ, JW, PL and GZ contributed to the measurements. TW, JM, SDörner, SDonner, JJ, SC, JP and JL contributed to the data analyses. TW and JM prepared the manuscript with consented by all co-authors.

## 5 Competing interests

The authors declare that they have no conflict of interest.

## Special issue statement

This article is part of the special issue “Study of ozone, aerosols and radiation over the Tibetan Plateau (SOAR-TP) (ACP/AMT inter-journal SI)”. It is not associated with a conference.

## 10 Acknowledgements.

This work was funded by MOST (grant no. 2018YFC1505703) and NSFC (grant nos. 41275140 and 41875146). We thank all the staff from WLG for assisting measurement work.

## References

- 15 Bauwens, M., Stavrou, T., Müller, J. F., De Smedt, I., Van Roozendaal, M., van der Werf, G. R., Wiedinmyer, C., Kaiser, J. W., Sindelarova, K., and Guenther, A.: Nine years of global hydrocarbon emissions based on source inversion of OMI formaldehyde observations, *Atmos. Chem. Phys.*, 16, 10133-10158, 10.5194/acp-16-10133-2016, 2016.
- Bobrowski, N., Honninger, G., Galle, B., and Platt, U.: Detection of bromine monoxide in a volcanic plume, *Nature*, 423, 273-276, 2003.
- 20 Coburn, S., Dix, B., Sinreich, R., and Volkamer, R.: The CU ground MAX-DOAS instrument: characterization of RMS noise limitations and first measurements near Pensacola, FL of BrO, IO, and CHOCHO, *Atmos. Meas. Tech.*, 4, 2421-2439, 10.5194/amt-4-2421-2011, 2011.
- De Mazière, M., Thompson, A. M., Kurylo, M. J., Wild, J. D., Bernhard, G., Blumenstock, T., Braathen, G. O., Hannigan, J. W., Lambert, J. C., Leblanc, T., McGee, T. J., Nedoluha, G., Petropavlovskikh, I., Seckmeyer, G., Simon, P. C., Steinbrecht, W., and Strahan, S. E.: The Network for the Detection of Atmospheric Composition Change (NDACC):
- 25 history, status and perspectives, *Atmos. Chem. Phys.*, 18, 4935-4964, 10.5194/acp-18-4935-2018, 2018.
- De Smedt, I., Stavrou, T., Hendrick, F., Danckaert, T., Vlemmix, T., Pinardi, G., Theys, N., Lerot, C., Gielen, C., Vigouroux, C., Hermans, C., Fayt, C., Veefkind, P., Müller, J. F., and Van Roozendaal, M.: Diurnal, seasonal and long-term variations of global formaldehyde columns inferred from combined OMI and GOME-2 observations, *Atmos. Chem. Phys.*, 15, 12519-12545, 10.5194/acp-15-12519-2015, 2015.

- Dentener, F., Kinne, S., Bond, T., Boucher, O., Cofala, J., Generoso, S., Ginoux, P., Gong, S., Hoelzemann, J. J., Ito, A., Marelli, L., Penner, J. E., Putaud, J. P., Textor, C., Schulz, M., van der Werf, G. R., and Wilson, J.: Emissions of primary aerosol and precursor gases in the years 2000 and 1750 prescribed data-sets for AeroCom, *Atmos. Chem. Phys.*, 6, 4321-4344, 10.5194/acp-6-4321-2006, 2006.
- 5 Fioletov, V. E., McLinden, C. A., Krotkov, N., Li, C., Joiner, J., Theys, N., Carn, S., and Moran, M. D.: A global catalogue of large SO<sub>2</sub> sources and emissions derived from the Ozone Monitoring Instrument, *Atmos. Chem. Phys.*, 16, 11497-11519, 10.5194/acp-16-11497-2016, 2016.
- Fitzenberger, R., Bösch, H., Camy, Peyret, C., Chipperfield, M. P., Harder, H., Platt, U., Sinnhuber, B., M, Wagner, T., and Pfeilsticker, K.: First profile measurements of tropospheric BrO, *Geophys. Res. Lett.*, 27, 2921-2924, 10.1029/2000gl011531, 2000.
- 10 Forster, P., Ramasway, V., Artaxo, P., Berntsen, T., Betts, R., Fahey, D. W., Haywood, J., Lean, J., Lowe, D. C., Myhre, G., Nganga, J., Prinn, R., Raga, G., Schulz, M., and Van Dorlando, R.: Changes in atmospheric constituents and in radiative forcing, in: *Climate Change 2007: The Physical Science Basis. Contribution of Working Group I to the Fourth Assessment Report of the Intergovernmental Panel on Climate Change*, edited by: Solomon, S., Qin, D., Manning, M., Chen, Z., Marquist, M., Averyt, K. B., Tignor, M., and Miller, H. L., Cambridge Univ. Press, Cambridge, U. K. and New York, U.S.A., 129-234, 2007.
- 15 Frieß U., Hollwedel, J., König-Langlo, G., Wagner, T., and Platt, U.: Dynamics and chemistry of tropospheric bromine explosion events in the Antarctic coastal region, *J. Geophys. Res.*, 109, D06305, 10.1029/2003jd004133, 2004.
- Georgoulias, A. K., van der A, R. J., Stammes, P., Boersma, K. F., and Eskes, H. J.: Trends and trend reversal detection in two decades of tropospheric NO<sub>2</sub> satellite observations, *Atmos. Chem. Phys. Discuss.*, 2018, 1-38, 10.5194/acp-2018-988, 2018.
- 20 Gielen, C., Van Roozendaal, M., Hendrick, F., Pinardi, G., Vlemmix, T., De Bock, V., De Backer, H., Fayt, C., Hermans, C., Gillotay, D., and Wang, P.: A simple and versatile cloud-screening method for MAX-DOAS retrievals, *Atmos. Meas. Tech.*, 7, 3509-3527, 10.5194/amt-7-3509-2014, 2014.
- 25 Gil-Ojeda, M., Navarro-Comas, M., Gómez-Martín, L., Adame, J. A., Saiz-Lopez, A., Cuevas, C. A., González, Y., Puentedura, O., Cuevas, E., Lamarque, J. F., Kinninson, D., and Tilmes, S.: NO<sub>2</sub> seasonal evolution in the north subtropical free troposphere, *Atmos. Chem. Phys.*, 15, 10567-10579, 10.5194/acp-15-10567-2015, 2015.
- Gomez, L., Navarro-Comas, M., Puentedura, O., Gonzalez, Y., Cuevas, E., and Gil-Ojeda, M.: Long-path averaged mixing ratios of O<sub>3</sub> and NO<sub>2</sub> in the free troposphere from mountain MAX-DOAS, *Atmos. Meas. Tech.*, 7, 3373-3386, 10.5194/amt-7-3373-2014, 2014.
- 30 Granier, C., Bessagnet, B., Bond, T., D'Angiola, A., Denier van der Gon, H., Frost, G. J., Heil, A., Kaiser, J. W., Kinne, S., Klimont, Z., Kloster, S., Lamarque, J.-F., Liousse, C., Masui, T., Meleux, F., Mieville, A., Ohara, T., Raut, J.-C., Riahi, K., Schultz, M. G., Smith, S. J., Thompson, A., van Aardenne, J., van der Werf, G. R., and van Vuuren, D. P.: Evolution of anthropogenic and biomass burning emissions of air pollutants at global and regional scales during the 1980–2010 period, *Climatic Change*, 109, 163, 10.1007/s10584-011-0154-1, 2011.
- 35 Hönninger, G., and Platt, U.: Observations of BrO and its vertical distribution during surface ozone depletion at Alert, *Atmospheric Environment*, 36, 2481-2489, 2002.
- Hönninger, G., von Friedeburg, C., and Platt, U.: Multi axis differential optical absorption spectroscopy (MAX-DOAS), *Atmos. Chem. Phys.*, 4, 231-254, 10.5194/acp-4-231-2004, 2004.

- Hammer, M. S., Martin, R. V., Li, C., Torres, O., Manning, M., and Boys, B. L.: Insight into global trends in aerosol composition from 2005 to 2015 inferred from the OMI Ultraviolet Aerosol Index, *Atmos. Chem. Phys.*, 18, 8097-8112, 10.5194/acp-18-8097-2018, 2018.
- 5 Harder, H., Camy, Peyret, C., Ferlemann, F., Fitzenberger, R., Hawat, T., Osterkamp, H., Schneider, M., Perner, D., Platt, U., Vradelis, P., and Pfeilsticker, K.: Stratospheric BrO profiles measured at different latitudes and seasons: Atmospheric observations, *Geophys. Res. Lett.*, 25, 3843-3846, 10.1029/1998gl900026, 1998.
- Hendrick, F., Van Roozendaal, M., Chipperfield, M. P., Dorf, M., Goutail, F., Yang, X., Fayt, C., Hermans, C., Pfeilsticker, K., Pommereau, J. P., Pyle, J. A., Theys, N., and De Mazière, M.: Retrieval of stratospheric and tropospheric BrO profiles and columns using ground-based zenith-sky DOAS observations at Harestua, 60°N, *Atmos. Chem. Phys.*, 7, 4869-4885, 10.5194/acp-7-4869-2007, 2007.
- 10 Hendrick, F., Müller, J. F., Cléner, K., Wang, P., De Mazière, M., Fayt, C., Gielen, C., Hermans, C., Ma, J. Z., Pinardi, G., Stavrou, T., Vlemmix, T., and Van Roozendaal, M.: Four years of ground-based MAX-DOAS observations of HONO and NO<sub>2</sub> in the Beijing area, *Atmos. Chem. Phys.*, 14, 765-781, 10.5194/acp-14-765-2014, 2014.
- Jin, J., Ma, J., Lin, W., Zhao, H., Shaiganfar, R., Beirle, S., and Wagner, T.: MAX-DOAS measurements and satellite validation of tropospheric NO<sub>2</sub> and SO<sub>2</sub> vertical column densities at a rural site of North China, *Atmospheric Environment*, 133, 12-25, <http://dx.doi.org/10.1016/j.atmosenv.2016.03.031>, 2016.
- 15 Klimont, Z., Kupiainen, K., Heyes, C., Purohit, P., Cofala, J., Rafaj, P., Borken-Kleefeld, J., and Schöpp, W.: Global anthropogenic emissions of particulate matter including black carbon, *Atmos. Chem. Phys.*, 17, 8681-8723, 10.5194/acp-17-8681-2017, 2017.
- 20 Krotkov, N. A., McLinden, C. A., Li, C., Lamsal, L. N., Celarier, E. A., Marchenko, S. V., Swartz, W. H., Bucsela, E. J., Joiner, J., Duncan, B. N., Boersma, K. F., Veefkind, J. P., Levelt, P. F., Fioletov, V. E., Dickerson, R. R., He, H., Lu, Z., and Streets, D. G.: Aura OMI observations of regional SO<sub>2</sub> and NO<sub>2</sub> pollution changes from 2005 to 2015, *Atmos. Chem. Phys.*, 16, 4605-4629, 10.5194/acp-16-4605-2016, 2016.
- Lübcke, P., Lampel, J., Arellano, S., Bobrowski, N., Dinger, F., Galle, B., Garzón, G., Hidalgo, S., Chacón Ortiz, Z., Vogel, L., Warnach, S., and Platt, U.: Retrieval of absolute SO<sub>2</sub> column amounts from scattered-light spectra: implications for the evaluation of data from automated DOAS networks, *Atmos. Meas. Tech.*, 9, 5677-5698, 10.5194/amt-9-5677-2016, 2016.
- 25 Lampel, J., Zielcke, J., Schmitt, S., Pöhler, D., Frieß, U., Platt, U., and Wagner, T.: Detection of O<sub>4</sub> absorption around 328 and 419 nm in measured atmospheric absorption spectra, *Atmos. Chem. Phys.*, 18, 1671-1683, 10.5194/acp-18-1671-2018, 2018.
- 30 Lary, D. J.: Halogens and the chemistry of the free troposphere, *Atmos. Chem. Phys.*, 5, 227-237, 10.5194/acp-5-227-2005, 2005.
- Lee, D. S., Köhler, I., Grobler, E., Rohrer, F., Sausen, R., Gallardo-Klenner, L., Olivier, J. G. J., Dentener, F. J., and Bouwman, A. F.: Estimations of global no, emissions and their uncertainties, *Atmospheric Environment*, 31, 1735-1749, [https://doi.org/10.1016/S1352-2310\(96\)00327-5](https://doi.org/10.1016/S1352-2310(96)00327-5), 1997.
- 35 Lelieveld, J., Gromov, S., Pozzer, A., and Taraborrelli, D.: Global tropospheric hydroxyl distribution, budget and reactivity, *Atmospheric Chemistry and Physics*, 16, 12477-12493, 10.5194/acp-16-12477-2016, 2016.
- Leser, H., Hönninger, G., and Platt, U.: MAX-DOAS measurements of BrO and NO<sub>2</sub> in the marine boundary layer, *Geophys. Res. Lett.*, 30, 1537, 10.1029/2002gl015811, 2003.
- 40 Li, C., Martin, R. V., van Donkelaar, A., Boys, B. L., Hammer, M. S., Xu, J.-W., Marais, E. A., Reff, A., Strum, M., Ridley, D. A., Crippa, M., Brauer, M., and Zhang, Q.: Trends in Chemical Composition of Global and Regional Population-

- Weighted Fine Particulate Matter Estimated for 25 Years, *Environmental Science & Technology*, 51, 11185-11195, 10.1021/acs.est.7b02530, 2017.
- Lin, W., Xu, X., Yu, X., Zhang, X., and Huang, J.: Observed levels and trends of gaseous SO<sub>2</sub> and HNO<sub>3</sub> at Mt. Waliguan, China: Results from 1997 to 2009, *Journal of Environmental Sciences*, 25, 726-734, [https://doi.org/10.1016/S1001-0742\(12\)60143-0](https://doi.org/10.1016/S1001-0742(12)60143-0), 2013.
- 5 Luo, Y., Si, F., Zhou, H., Dou, K., Liu, Y., and Liu, W.: Observations and source investigations of the boundary layer bromine monoxide (BrO) in the Ny-Ålesund Arctic, *Atmos. Chem. Phys.*, 18, 9789-9801, 10.5194/acp-18-9789-2018, 2018.
- Ma, J., Tang, J., Zhou, X., and Zhang, X.: Estimates of the chemical budget for ozone at Waliguan Observatory J. *Atmos. Chem.*, 41, 21-48, 10.1023/A:1013892308983 2002a.
- 10 Ma, J., Zhou, X., and Hauglustaine, D.: Summertime tropospheric ozone over China simulated with a regional chemical transport model 2. Source contributions and budget, *Journal of Geophysical Research: Atmospheres*, 107, 4612, 10.1029/2001jd001355, 2002b.
- Ma, J. Z., Chen, Y., Wang, W., Yan, P., Liu, H. J., Yang, S. Y., Hu, Z. J., and Lelieveld, J.: Strong air pollution causes widespread haze-clouds over China, *J. Geophys. Res.*, 115, D18204, 10.1029/2009jd013065, 2010.
- 15 Ma, J. Z., Wang, W., Chen, Y., Liu, H. J., Yan, P., Ding, G. A., Wang, M. L., Sun, J., and Lelieveld, J.: The IPAC-NC field campaign: a pollution and oxidization pool in the lower atmosphere over Huabei, China, *Atmos. Chem. Phys.*, 12, 3883-3908, 10.5194/acp-12-3883-2012, 2012.
- Ma, J. Z., Beirle, S., Jin, J. L., Shaiganfar, R., Yan, P., and Wagner, T.: Tropospheric NO<sub>2</sub> vertical column densities over Beijing: results of the first three years of ground-based MAX-DOAS measurements (2008-2011) and satellite validation, *Atmos. Chem. Phys.*, 13, 1547-1567, 10.5194/acp-13-1547-2013, 2013.
- 20 Martin, M., Pöhler, D., Seitz, K., Sinreich, R., and Platt, U.: BrO measurements over the Eastern North-Atlantic, *Atmos. Chem. Phys.*, 9, 9545-9554, 2009.
- Meng, Z.-Y., Xu, X.-B., Wang, T., Zhang, X.-Y., Yu, X.-L., Wang, S.-F., Lin, W.-L., Chen, Y.-Z., Jiang, Y.-A., and An, X.-Q.: Ambient sulfur dioxide, nitrogen dioxide, and ammonia at ten background and rural sites in China during 2007–2008, *Atmospheric Environment*, 44, 2625-2631, <https://doi.org/10.1016/j.atmosenv.2010.04.008>, 2010.
- 25 Mu, Y., Pang, X., Quan, J., and Zhang, X.: Atmospheric carbonyl compounds in Chinese background area: A remote mountain of the Qinghai-Tibetan Plateau, *Journal of Geophysical Research: Atmospheres*, 112, D22302, 10.1029/2006jd008211, 2007.
- 30 Peterson, P. K., Simpson, W. R., Pratt, K. A., Shepson, P. B., Frieß U., Zielcke, J., Platt, U., Walsh, S. J., and Nghiem, S. V.: Dependence of the vertical distribution of bromine monoxide in the lower troposphere on meteorological factors such as wind speed and stability, *Atmos. Chem. Phys.*, 15, 2119-2137, 10.5194/acp-15-2119-2015, 2015.
- Peterson, P. K., Pöhler, D., Sihler, H., Zielcke, J., General, S., Frieß U., Platt, U., Simpson, W. R., Nghiem, S. V., Shepson, P. B., Stirm, B. H., Dhaniyala, S., Wagner, T., Caulton, D. R., Fuentes, J. D., and Pratt, K. A.: Observations of bromine monoxide transport in the Arctic sustained on aerosol particles, *Atmos. Chem. Phys.*, 17, 7567-7579, 10.5194/acp-17-7567-2017, 2017.
- 35 Platt, U., and Hönninger, G.: The role of halogen species in the troposphere, *Chemosphere*, 52, 325-338, 2003.
- Prados-Roman, C., Gómez-Martín, L., Puentedura, O., Navarro-Comas, M., Iglesias, J., de Mingo, J. R., Pérez, M., Ochoa, H., Barlasina, M. E., Carbajal, G., and Yela, M.: Reactive bromine in the low troposphere of Antarctica: estimations at two research sites, *Atmos. Chem. Phys.*, 18, 8549-8570, 10.5194/acp-18-8549-2018, 2018.
- 40

- Richter, A., Wittrock, F., Ladstätter-Weissenmayer, A., and Burrows, J. P.: GOME measurements of stratospheric and tropospheric BrO, *Adv. Space Res.*, 29, 1667–1672, 2002.
- Roscoe, H. K., Brough, N., Jones, A. E., Wittrock, F., Richter, A., Van Roozendaal, M., and Hendrick, F.: Resolution of an important discrepancy between remote and in-situ measurements of tropospheric BrO during Antarctic enhancements, *Atmos. Meas. Tech. Discuss.*, 2012, 5419-5448, 10.5194/amtd-5-5419-2012, 2012.
- Saiz-Lopez, A., Plane, J. M. C., and Shillito, J. A.: Bromine oxide in the mid-latitude marine boundary layer, *Geophys. Res. Lett.*, 31, L03111, 10.1029/2003gl018956, 2004.
- Schreier, S. F., Richter, A., Wittrock, F., and Burrows, J. P.: Estimates of free-tropospheric NO<sub>2</sub> and HCHO mixing ratios derived from high-altitude mountain MAX-DOAS observations at midlatitudes and in the tropics, *Atmos. Chem. Phys.*, 16, 2803-2817, 10.5194/acp-16-2803-2016, 2016.
- Seinfeld, J. H., and Pandis, S. N.: *Atmospheric Chemistry and Physics: From Air Pollution to Climate Change* (Second Edition), John Wiley & Sons, Inc., Hoboken, New Jersey, 2006.
- Simpson, W. R., Peterson, P. K., Frieß, U., Sihler, H., Lampel, J., Platt, U., Moore, C., Pratt, K., Shepson, P., Halfacre, J., and Nghiem, S. V.: Horizontal and vertical structure of reactive bromine events probed by bromine monoxide MAX-DOAS, *Atmos. Chem. Phys.*, 17, 9291-9309, 10.5194/acp-17-9291-2017, 2017.
- Stavrakou, T., Müller, J. F., De Smedt, I., Van Roozendaal, M., van der Werf, G. R., Giglio, L., and Guenther, A.: Evaluating the performance of pyrogenic and biogenic emission inventories against one decade of space-based formaldehyde columns, *Atmos. Chem. Phys.*, 9, 1037-1060, 10.5194/acp-9-1037-2009, 2009.
- Stohl, A., Aamaas, B., Amann, M., Baker, L. H., Bellouin, N., Berntsen, T. K., Boucher, O., Cherian, R., Collins, W., Daskalakis, N., Dusinska, M., Eckhardt, S., Fuglestedt, J. S., Harju, M., Heyes, C., Hodnebrog, Ø., Hao, J., Im, U., Kanakidou, M., Klimont, Z., Kupiainen, K., Law, K. S., Lund, M. T., Maas, R., MacIntosh, C. R., Myhre, G., Myriokefalitakis, S., Olivié, D., Quaas, J., Quennehen, B., Raut, J. C., Rumbold, S. T., Samset, B. H., Schulz, M., Seland, Ø., Shine, K. P., Skeie, R. B., Wang, S., Yttri, K. E., and Zhu, T.: Evaluating the climate and air quality impacts of short-lived pollutants, *Atmos. Chem. Phys.*, 15, 10529-10566, 10.5194/acp-15-10529-2015, 2015.
- Stutz, J., Ackermann, R., Fast, J. D., and Barrie, L.: Atmospheric reactive chlorine and bromine at the Great Salt Lake, Utah, *Geophys. Res. Lett.*, 29, 1380, 10.1029/2002gl014812, 2002.
- Tang, J., Wen, Y. P., Xu, X. B., Zheng, X. D., Guo, S., and Zhao, Y. C.: China Global Atmosphere Watch Baseline Observatory and its measurement program: In: *CAMS Annual Report 1994-1995*, Beijing, 56-65, 1995.
- Theys, N., Van Roozendaal, M., Hendrick, F., Fayt, C., Hermans, C., Baray, J. L., Goutail, F., Pommereau, J. P., and De Mazière, M.: Retrieval of stratospheric and tropospheric BrO columns from multi-axis DOAS measurements at Reunion Island (21°S, 56°E), *Atmos. Chem. Phys.*, 7, 4733-4749, 10.5194/acp-7-4733-2007, 2007.
- Tulet, P., Di Muro, A., Colomb, A., Denjean, C., Dufлот, V., Arellano, S., Foucart, B., Brioude, J., Sellegri, K., Peltier, A., Aiuppa, A., Barthe, C., Bhugwant, C., Bielli, S., Boissier, P., Boudoire, G., Bourriane, T., Brunet, C., Burnet, F., Cammas, J. P., Gabarrot, F., Galle, B., Giudice, G., Guadagno, C., Jeamblu, F., Kowalski, P., Leclair de Bellevue, J., Marquestaut, N., Mekiés, D., Metzger, J. M., Pianezze, J., Portafaix, T., Sciare, J., Tournigand, A., and Villeneuve, N.: First results of the Piton de la Fournaise STRAP 2015 experiment: multidisciplinary tracking of a volcanic gas and aerosol plume, *Atmos. Chem. Phys.*, 17, 5355-5378, 10.5194/acp-17-5355-2017, 2017.
- Van Roozendaal, M., Wagner, T., Richter, A., Pundt, I., Arlander, D., Burrows, J. P., Chipperfield, M., Fayt, C., Johnston, P. V., Lambert, J.-C., Kreher, K., Pfeilsticker, K., Platt, U., Pommereau, J.-P., Sinnhuber, B.-M., Tornkvist, K. K., and

- Wittrock, F.: Intercomparison of BrO measurements from ERS-2 GOME, ground-based and balloon platforms, *Adv. Space Res.*, 29, 1661–1666, 2002.
- Van Roozendael, M., Fayt, C., Post, P., Hermans, C., and Lambert, J.-C.: Retrieval of BrO and NO<sub>2</sub> from UV-Visible Observations, in: *Sounding the troposphere from space: a new Era for Atmospheric Chemistry, The TROPOSAT Final Report*, edited by: Borrell, P., Borrell, P. M., Burrows, J. P., and Platt, U., Springer, Dordrecht, 155–166, 2003.
- 5 Volkamer, R., Baidar, S., Campos, T. L., Coburn, S., DiGangi, J. P., Dix, B., Eloranta, E. W., Koenig, T. K., Morley, B., Ortega, I., Pierce, B. R., Reeves, M., Sinreich, R., Wang, S., Zondlo, M. A., and Romashkin, P. A.: Aircraft measurements of BrO, IO, glyoxal, NO<sub>2</sub>, H<sub>2</sub>O, O<sub>2</sub>–O<sub>2</sub> and aerosol extinction profiles in the tropics: comparison with aircraft-/ship-based in situ and lidar measurements, *Atmos. Meas. Tech.*, 8, 2121–2148, 10.5194/amt-8-2121-2015, 2015.
- 10 von Glasow, R., von Kuhlmann, R., Lawrence, M. G., Platt, U., and Crutzen, P. J.: Impact of reactive bromine chemistry in the troposphere, *Atmos. Chem. Phys.*, 4, 2481–2497, 10.5194/acp-4-2481-2004, 2004.
- von Glasow, R., and Crutzen, P. J.: *Tropospheric Halogen Chemistry*, in: *Treatise on Geochemistry Update1*, edited by: Holland, H. D., and Turekian, K. K., Elsevier-Pergamon, Oxford, UK, 1–67, 2007.
- Wagner, T., Dix, B., Friedeburg, C. v., Frieß U., Sanghavi, S., Sinreich, R., and Platt, U.: MAX-DOAS O<sub>4</sub> measurements: A new technique to derive information on atmospheric aerosols -- Principles and information content, *J. Geophys. Res.*, 109, D22205, 10.1029/2004jd004904, 2004.
- 15 Wagner, T., Burrows, J. P., Deutschmann, T., Dix, B., von Friedeburg, C., Frieß U., Hendrick, F., Heue, K. P., Irie, H., Iwabuchi, H., Kanaya, Y., Keller, J., McLinden, C. A., Oetjen, H., Palazzi, E., Petritoli, A., Platt, U., Postlyakov, O., Pukite, J., Richter, A., van Roozendael, M., Rozanov, A., Rozanov, V., Sinreich, R., Sanghavi, S., and Wittrock, F.: Comparison of box-air-mass-factors and radiances for Multiple-Axis Differential Optical Absorption Spectroscopy (MAX-DOAS) geometries calculated from different UV/visible radiative transfer models, *Atmos. Chem. Phys.*, 7, 1809–1833, 10.5194/acp-7-1809-2007, 2007a.
- 20 Wagner, T., Ibrahim, O., Sinreich, R., Frieß U., von Glasow, R., and Platt, U.: Enhanced tropospheric BrO over Antarctic sea ice in mid winter observed by MAX-DOAS on board the research vessel Polarstern, *Atmos. Chem. Phys.*, 7, 3129–3142, 10.5194/acp-7-3129-2007, 2007b.
- 25 Wagner, T., Apituley, A., Beirle, S., Dörner, S., Friess, U., Remmers, J., and Shaiganfar, R.: Cloud detection and classification based on MAX-DOAS observations, *Atmos. Meas. Tech.*, 7, 1289–1320, 10.5194/amt-7-1289-2014, 2014.
- Wagner, T., Beirle, S., Remmers, J., Shaiganfar, R., and Wang, Y.: Absolute calibration of the colour index and O<sub>4</sub> absorption derived from Multi AXis (MAX-)DOAS measurements and their application to a standardised cloud classification algorithm, *Atmos. Meas. Tech.*, 9, 4803–4823, 10.5194/amt-9-4803-2016, 2016.
- 30 Wang, T., Wong, H. L. A., Tang, J., Ding, A., Wu, W. S., and Zhang, X. C.: On the origin of surface ozone and reactive nitrogen observed at a remote mountain site in the northeastern Qinghai-Tibetan Plateau, western China, *Journal of Geophysical Research: Atmospheres*, 111, D08303, 10.1029/2005jd006527, 2006.
- Wang, T., Hendrick, F., Wang, P., Tang, G., Clémer, K., Yu, H., Fayt, C., Hermans, C., Gielen, C., Müller, J. F., Pinardi, G., Theys, N., Brenot, H., and Van Roozendael, M.: Evaluation of tropospheric SO<sub>2</sub> retrieved from MAX-DOAS measurements in Xianghe, China, *Atmos. Chem. Phys.*, 14, 11149–11164, 10.5194/acp-14-11149-2014, 2014.
- 35 Wang, Y., Lampel, J., Xie, P., Beirle, S., Li, A., Wu, D., and Wagner, T.: Ground-based MAX-DOAS observations of tropospheric aerosols, NO<sub>2</sub>, SO<sub>2</sub> and HCHO in Wuxi, China, from 2011 to 2014, *Atmos. Chem. Phys.*, 17, 2189–2215, 10.5194/acp-17-2189-2017, 2017.

- Werner, B., Stutz, J., Spolaor, M., Scalone, L., Raecke, R., Festa, J., Colosimo, S. F., Cheung, R., Tsai, C., Hossaini, R., Chipperfield, M. P., Taverna, G. S., Feng, W., Elkins, J. W., Fahey, D. W., Gao, R. S., Hintsä, E. J., Thornberry, T. D., Moore, F. L., Navarro, M. A., Atlas, E., Daube, B. C., Pittman, J., Wofsy, S., and Pfeilsticker, K.: Probing the subtropical lowermost stratosphere and the tropical upper troposphere and tropopause layer for inorganic bromine, *Atmos. Chem. Phys.*, 17, 1161-1186, 10.5194/acp-17-1161-2017, 2017.
- 5 Wittrock, F., Oetjen, H., Richter, A., Fietkau, S., Medeke, T., Rozanov, A., and Burrows, J. P.: MAX-DOAS measurements of atmospheric trace gases in Ny-Ålesund - Radiative transfer studies and their application, *Atmos. Chem. Phys.*, 4, 955-966, 10.5194/acp-4-955-2004, 2004.
- Xing, J., Mathur, R., Pleim, J., Hogrefe, C., Gan, C. M., Wong, D. C., Wei, C., Gilliam, R., and Pouliot, G.: Observations and modeling of air quality trends over 1990–2010 across the Northern Hemisphere: China, the United States and Europe, *Atmos. Chem. Phys.*, 15, 2723-2747, 10.5194/acp-15-2723-2015, 2015.
- 10 Xue, L. K., Wang, T., Zhang, J. M., Zhang, X. C., Deliger, Poon, C. N., Ding, A. J., Zhou, X. H., Wu, W. S., Tang, J., Zhang, Q. Z., and Wang, W. X.: Source of surface ozone and reactive nitrogen speciation at Mount Waliguan in western China: New insights from the 2006 summer study, *Journal of Geophysical Research: Atmospheres*, 116, D07306, 10.1029/2010jd014735, 2011.
- 15 Xue, L. K., Wang, T., Guo, H., Blake, D. R., Tang, J., Zhang, X. C., Saunders, S. M., and Wang, W. X.: Sources and photochemistry of volatile organic compounds in the remote atmosphere of western China: results from the Mt. Waliguan Observatory, *Atmos. Chem. Phys.*, 13, 8551-8567, 10.5194/acp-13-8551-2013, 2013.
- Yang, X., Cox, R. A., Warwick, N. J., Pyle, J. A., Carver, G. D., O'Connor, F. M., and Savage, N. H.: Tropospheric bromine chemistry and its impacts on ozone: A model study, *J. Geophys. Res.*, 110, D23311, 10.1029/2005jd006244, 2005.
- 20 Yang, X., Pyle, J. A., Cox, R. A., Theys, N., and Van Roozendaal, M.: Snow-sourced bromine and its implications for polar tropospheric ozone, *Atmos. Chem. Phys.*, 10, 7763-7773, 10.5194/acp-10-7763-2010, 2010.
- Yu, X., Tang, J., Li, X. S., and Liang, B. S.: Observation and analysis of SO<sub>2</sub> and NO<sub>2</sub> in clean air of western China, *Quarterly J. Applied Meteorology*, 8, 62-68, 1997.
- 25 Zhao, B., Wang, P., Ma, J. Z., Zhu, S., Pozzer, A., and Li, W.: A high-resolution emission inventory of primary pollutants for the Huabei region, China, *Atmos. Chem. Phys.*, 12, 481-501, 10.5194/acp-12-481-2012, 2012.
- Ziemke, J. R., Oman, L. D., Strode, S. A., Douglass, A. R., Olsen, M. A., McPeters, R. D., Bhartia, P. K., Froidevaux, L., Labow, G. J., Witte, J. C., Thompson, A. M., Haffner, D. P., Kramarova, N. A., Frith, S. M., Huang, L. K., Jaross, G. R., Seftor, C. J., Deland, M. T., and Taylor, S. L.: Trends in Global Tropospheric Ozone Inferred from a Composite Record of TOMS/OMI/MLS/OMPS Satellite Measurements and the MERRA-2 GMI Simulation, *Atmos. Chem. Phys. Discuss.*, 2018, 1-29, 10.5194/acp-2018-716, 2018.
- 30



**Table 1** Overview on the different fitting ranges and systematic and random errors for the retrieved trace gas dSCDs (for spectra averaged from 10 original spectra). More details are found in the Supplement.

|                                           | NO <sub>2</sub> | SO <sub>2</sub> | HCHO      | BrO       |
|-------------------------------------------|-----------------|-----------------|-----------|-----------|
| Wavelength range (nm)                     | 399 – 426       | 306 – 325       | 314 – 358 | 314 – 358 |
| Systematic error (molec/cm <sup>2</sup> ) | 6e14            | 8e15            | 4e15      | 3e12      |
| Random error (molec/cm <sup>2</sup> )     | 2e15            | 1.3e16          | 9e15      | 1.1e13    |

5 **Table 2.** Comparisons between trace gas mixing ratios at WLG and those recorded in other remote areas at low latitudes.

| Location           | Period                 | Method                               | NO <sub>2</sub><br>(ppt) | SO <sub>2</sub><br>(ppb) | HCHO<br>(ppb) | BrO<br>(ppt) | Reference                 |
|--------------------|------------------------|--------------------------------------|--------------------------|--------------------------|---------------|--------------|---------------------------|
| WLG                | 2012-2015              | MAX-DOAS                             | 5–70                     | <0.5                     | 0.3–0.7       | < 0.3        | This study                |
| WLG                | winter                 | MAX-DOAS                             | 5                        |                          |               |              | This study                |
| WLG                | spring                 | MAX-DOAS                             | 70                       |                          |               |              | This study                |
| WLG                | Jan 1996               | SP/ICG                               | 22                       |                          |               |              | Ma et al., 2002a          |
| WLG                | Jul 1996               | SP/ICG                               | 48                       |                          |               |              | Ma et al., 2002a          |
| WLG                | 2008                   | SP/SPM/ICG                           | 600                      | 0.7                      |               |              | Meng et al., 2010         |
| WLG                | 1997-2009              | SP/ICG                               |                          | 0.45                     |               |              | Lin et al, 2013           |
| WLG                | summer 2006            | CLS/PhC                              | 280                      |                          |               |              | Xue et al., 2011          |
| WLG                | spring 2003            | CLS/assuming                         | 280                      |                          |               |              | Xue et al., 2013          |
| WLG                | summer 2003            | CLS/assuming                         | 180                      |                          |               |              | Xue et al., 2013          |
| WLG                | Aug-Sept 2005          | SGC/HPLC                             |                          |                          | 4.16          |              | Mu et al., 2007           |
| WLG                | Dec 2005               | SGC/HPLC                             |                          |                          | 1.48          |              | Mu et al., 2007           |
| Izaña              | summer 2011            | MAX-DOAS                             | 20–40                    |                          |               |              | Gomez et al., 2014        |
| Izaña              | 2011-2013              | MAX-DOAS                             | 20–45                    |                          |               |              | Gil-Ojeda et al., 2015    |
| Zugspitze          | Feb-July 2003          | MAX-DOAS                             | 60–100                   |                          | 0.26–0.39     |              | Schreier et al., 2016     |
| Pico Espejo        | 2004- 2009             | MAX-DOAS                             | 9–16                     |                          | 0.50–0.95     |              | Schreier et al., 2016     |
| Atlantic MBL       | Oct 2000               | SMAX-DOAS                            | 24–200                   |                          |               | <1 –3.6      | Leser et al., 2003        |
| Kiruna<br>(Sweden) | Aug 1998 &<br>Feb 1999 | Balloon DOAS                         |                          |                          |               | 0.3 –1.2     | Fitzenberger et al., 2000 |
| Mace Head          | Aug 2002               | LP-DOAS                              |                          |                          |               | <0.8–6.5     | Saiz-Lopez et al., 2004   |
| Atlantic           | Jan-Feb 2012           | Ship/aircraft-<br>based MAX-<br>DOAS |                          |                          |               | 0 –2         | Volkamer et al., 2015     |

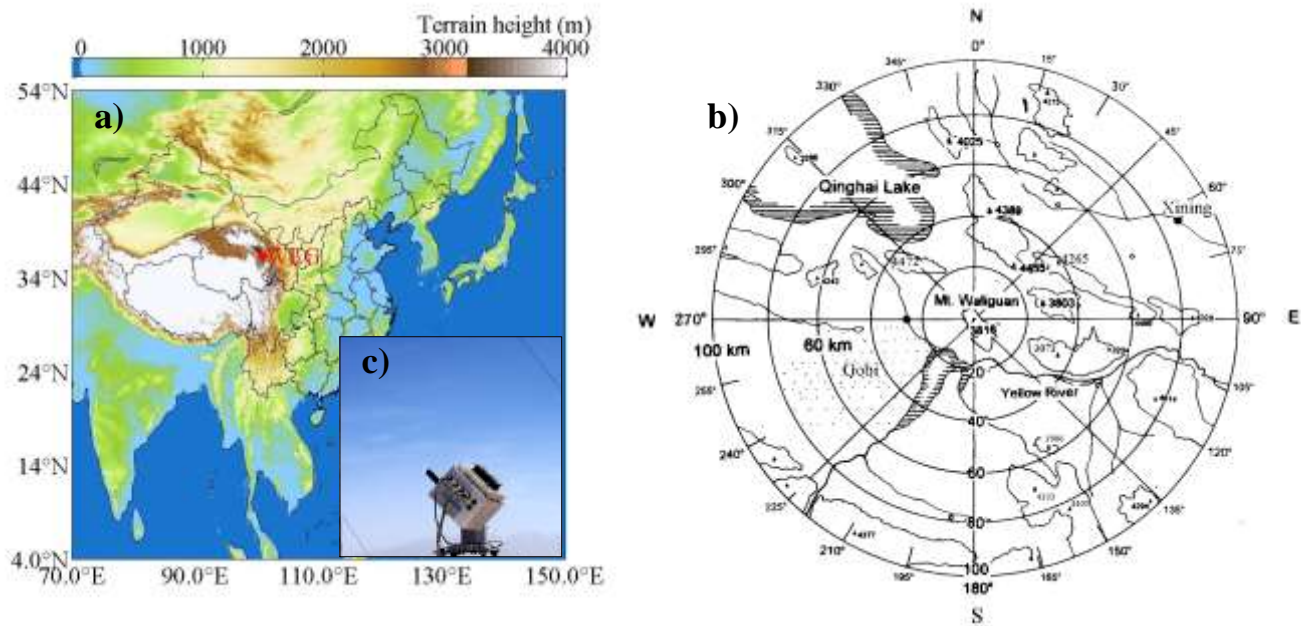

**Figure 1** (a) Position of Mt Waliguan in East Asia. (b) Surrounding topography within 100 km distance from WLG. (c) The MAX-DOAS instrument installed at WLG.

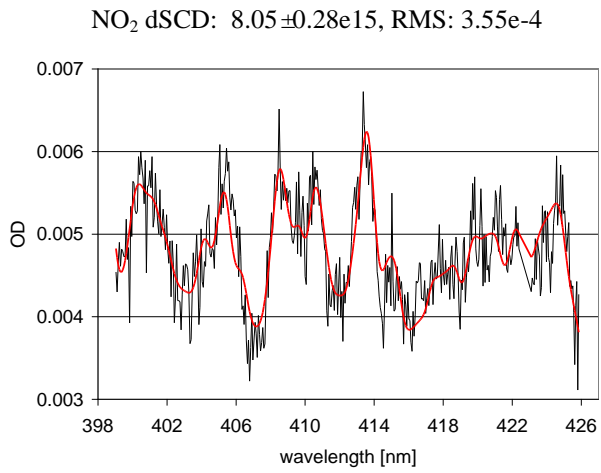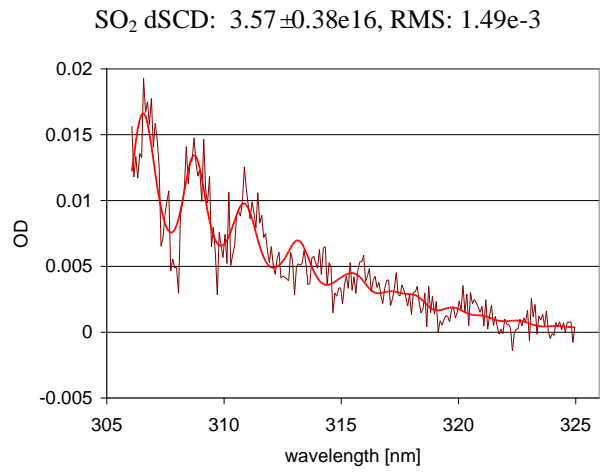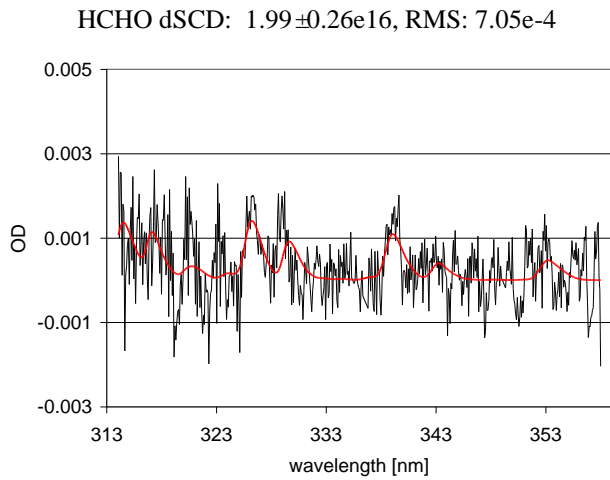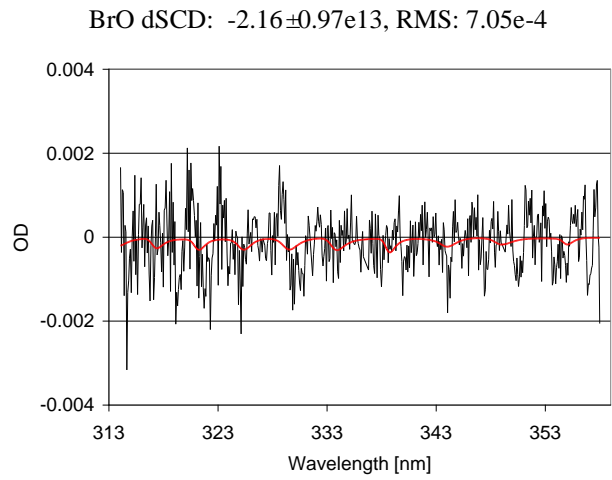

**Figure 2** Fit result for NO<sub>2</sub>, SO<sub>2</sub>, HCHO, and BrO for a spectrum (average of 10 original spectra) taken on 13 May 2013 (00:34 – 04:19) at 1 °elevation. On this day, enhanced absorptions of SO<sub>2</sub> and NO<sub>2</sub> were observed.

5

10

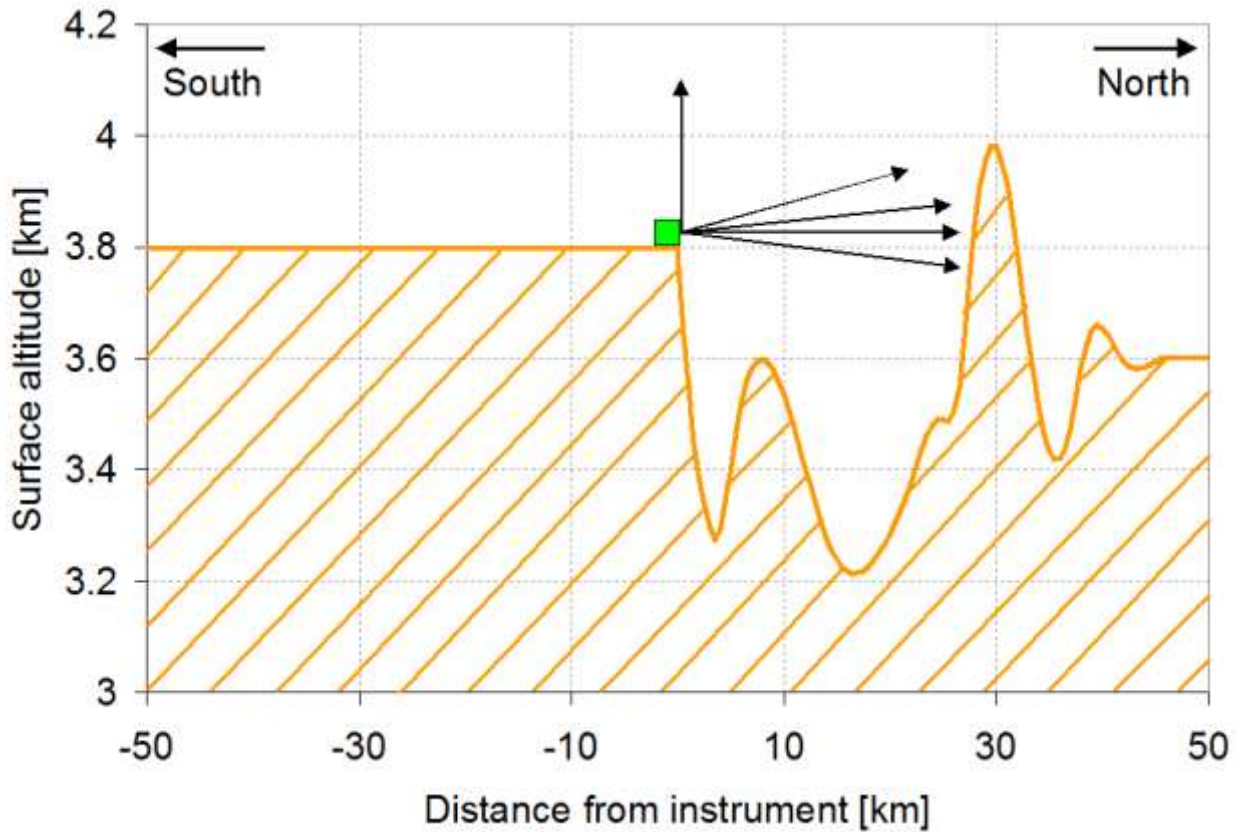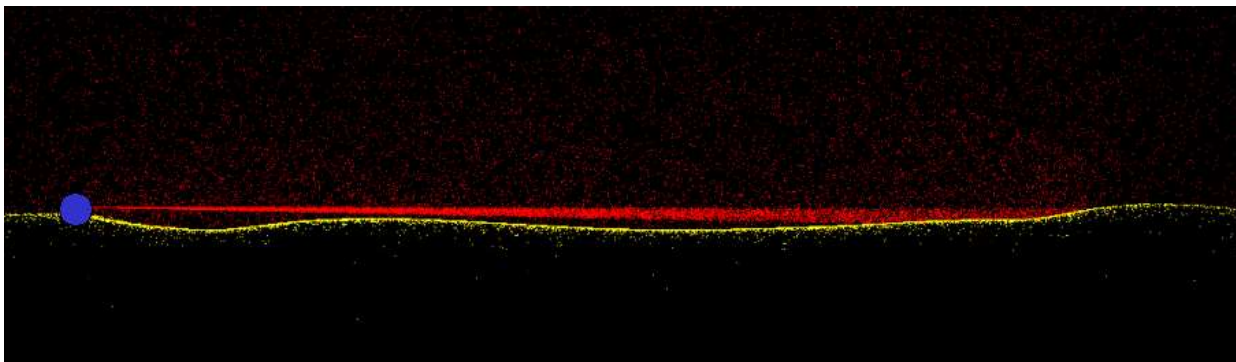

5 **Figure 3 Top:** Variation of the surface altitude in viewing direction (towards the North). The variation of the surface altitude across the viewing direction was not explicitly considered to minimise the computational effort. For the same reason, also the topography ‘behind’ the instrument, towards the South was assumed to be flat. **Bottom:** Illustration of the results of the radiative transfer simulations for the area between the instrument and the high mountain in 30 km distance. The blue dot indicates the position of the instrument. The small red and yellow dots indicate Rayleigh-scattering events and surface reflection of the simulated solar photons, respectively.

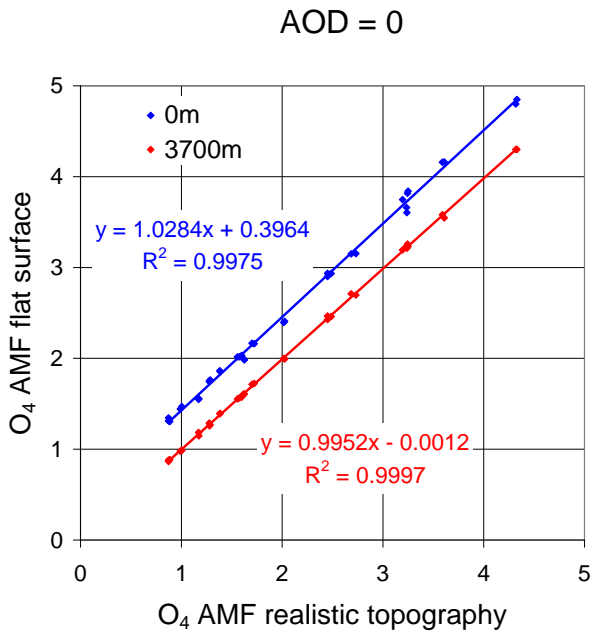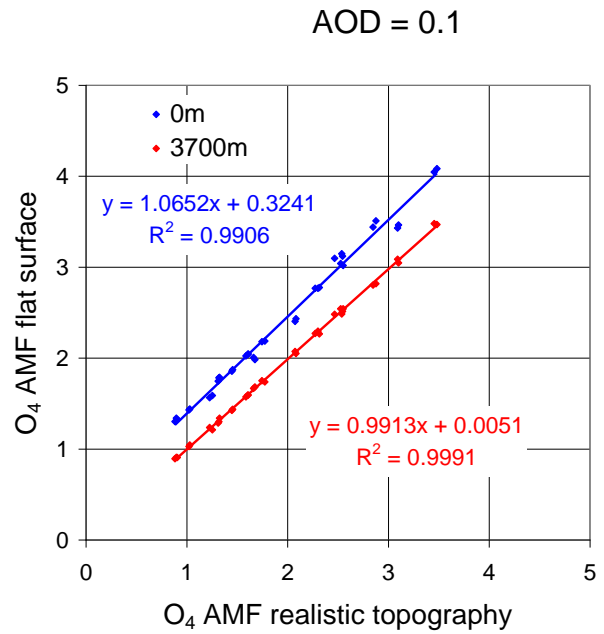

5

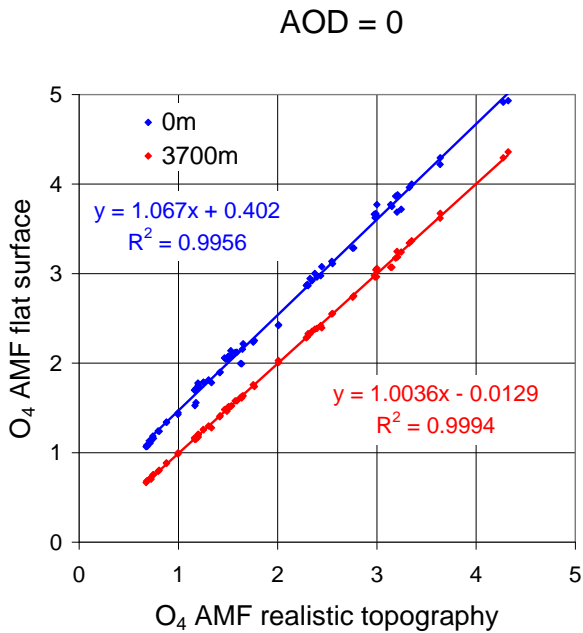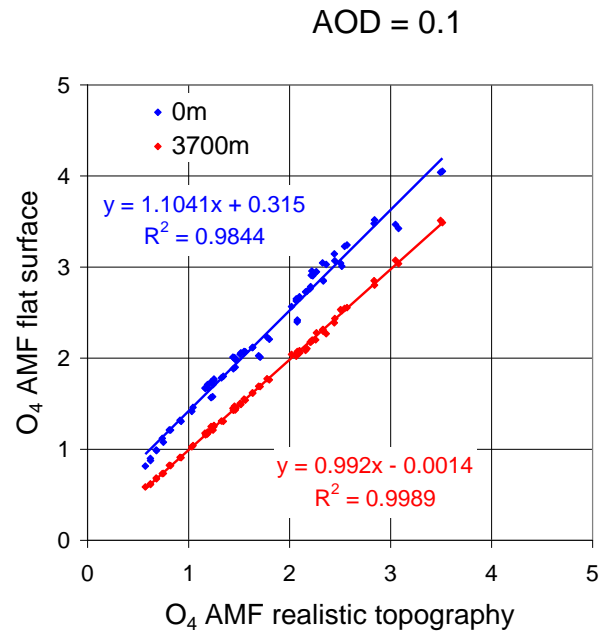

**Figure 4** Comparison of simulated  $O_4$  AMFs for different choices of the surface topography. Results for flat surfaces at sea level (blue) or 3700m (red) are plotted versus the results for a realistic surface topography (see Fig. 3). **Top:** results for winter; and **bottom:** results for summer. **Left:** results for simulation without aerosols; and **right:** results for an AOD of 0.1.

10

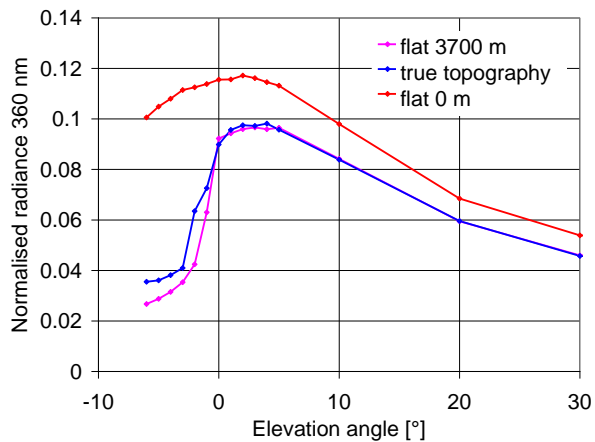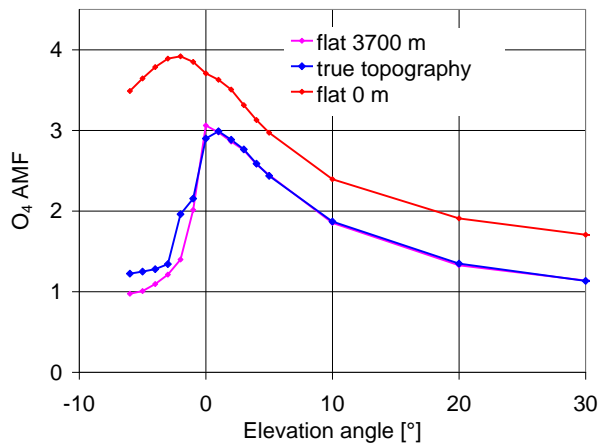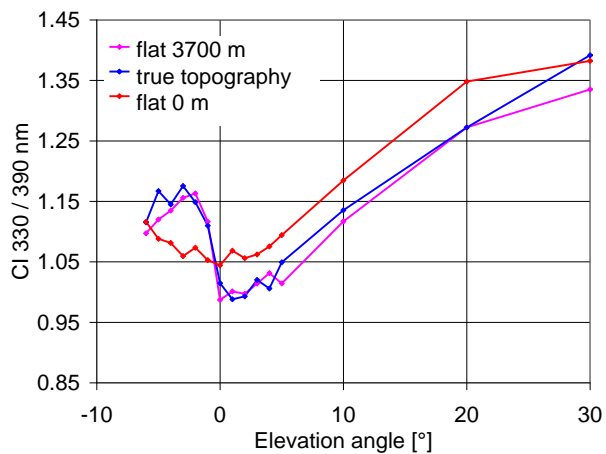

5 **Figure 5** Simulation results of the radiance (**top**), O<sub>4</sub> AMF (**middle**), and colour index (**bottom**) for different choices of the surface topography as function of the elevation angle (including negative elevation angles). Simulation results are for summer noontime (see also Fig. S3 in the supplement).

**Number of observations per month**

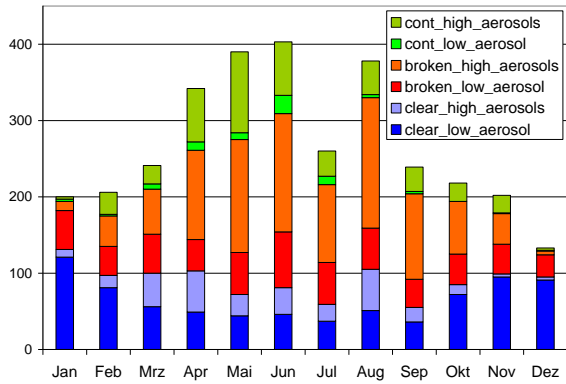

**Relative fraction per month**

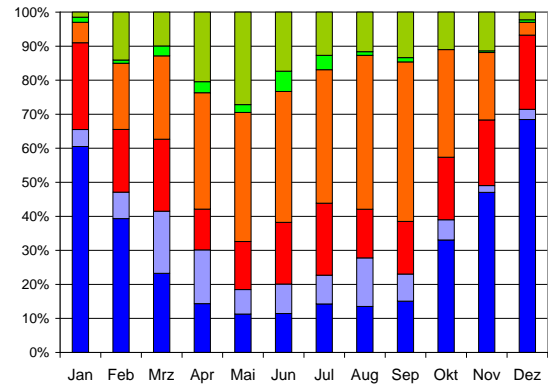

**Figure 6** Absolute (**left**) and relative (**right**) frequency of the different sky conditions. The statistics is based on the number of observations at 1 ° elevation angle of spectra averaged from 10 original spectra (April 2012 – April 2015). Only measurements with more than 800 scans are considered. The basic colours indicate the cloud properties (clear, broken clouds, continuous clouds). The full or light colours indicate observations with low or high aerosol loads, respectively.

10

15

20

25



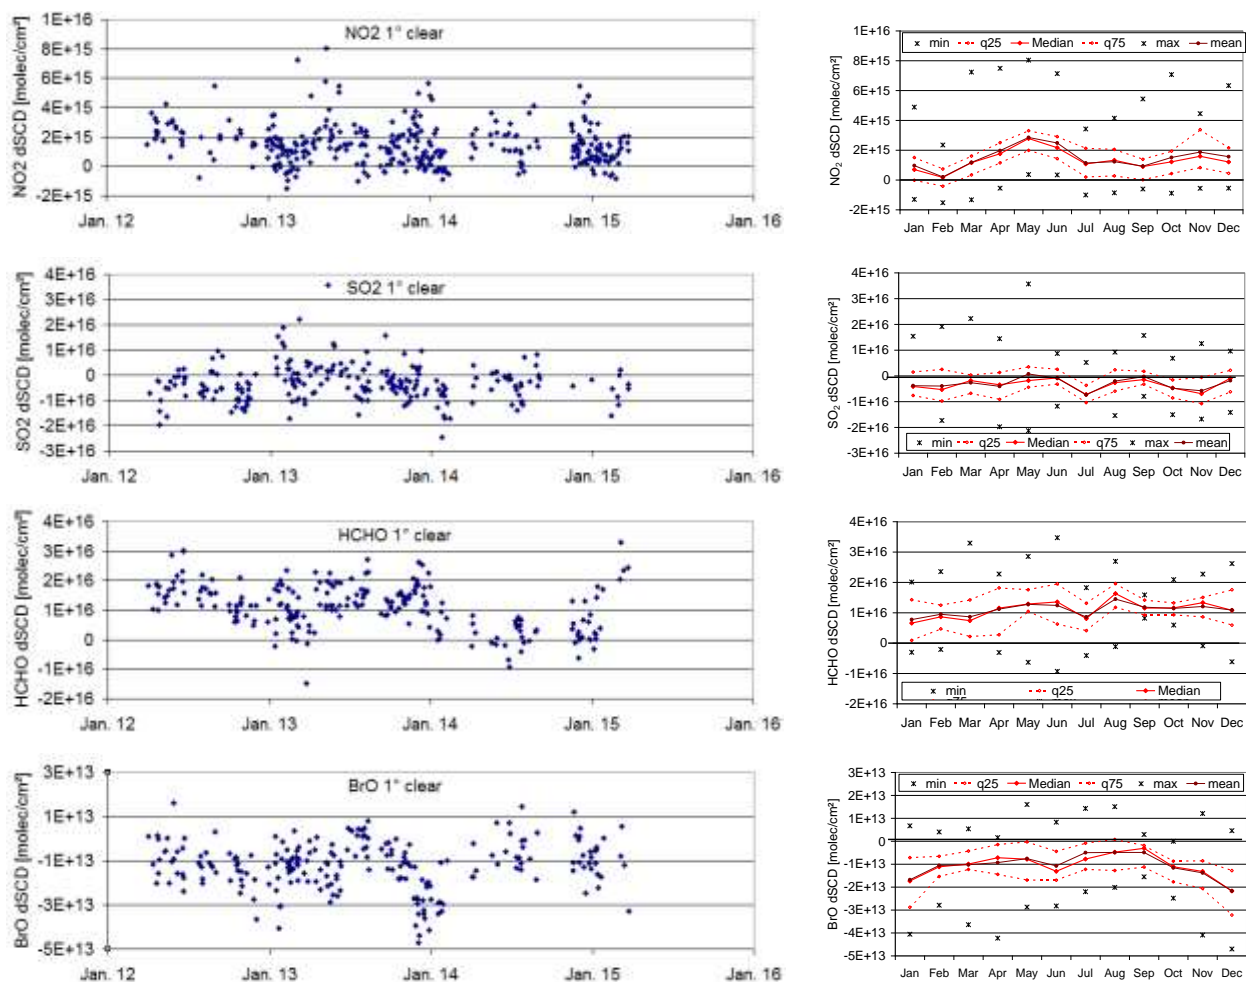

**Figure 7 Left:** Time series of daily averaged trace gas dSCDs at 1° elevation for clear sky spectra and low aerosol load from 2012 to 2015, with 'Jan 12' referring to '1 Jan 2012'. **Right:** Corresponding seasonal averages.

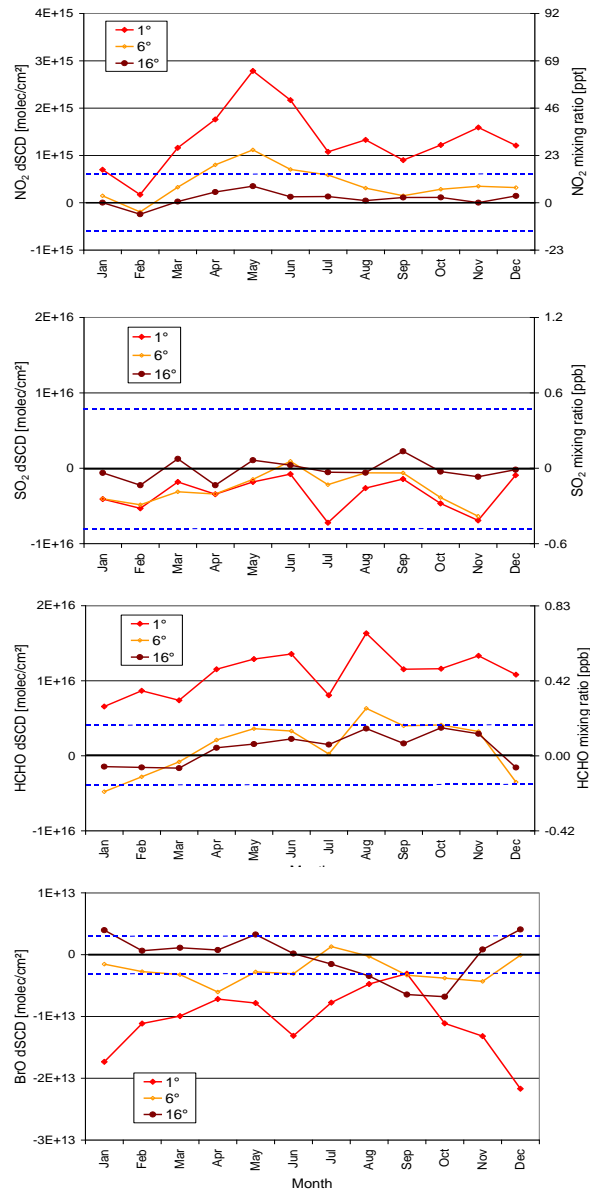

**Figure 8** Seasonal means of the trace gas dSCDs for different elevation angles for clear sky and low aerosol load. For NO<sub>2</sub>, SO<sub>2</sub>, and HCHO the right axes represent the approximate mixing ratios for measurements at 1° elevation angle. The blue dotted lines indicate the systematic uncertainties, which can be considered as lower bound of the detection limit.

## Supplement of

# **MAX-DOAS measurements of NO<sub>2</sub>, SO<sub>2</sub>, HCHO and BrO at the Mt. Waliguan WMO/GAW global baseline station in the Tibetan Plateau**

5

By Jianzhong Ma et al.

*Correspondence to:* Thomas Wagner (thomas.wagner@mpic.de) and Jianzhong Ma (majz@cma.gov.cn)

10

# 1 Meteorological conditions

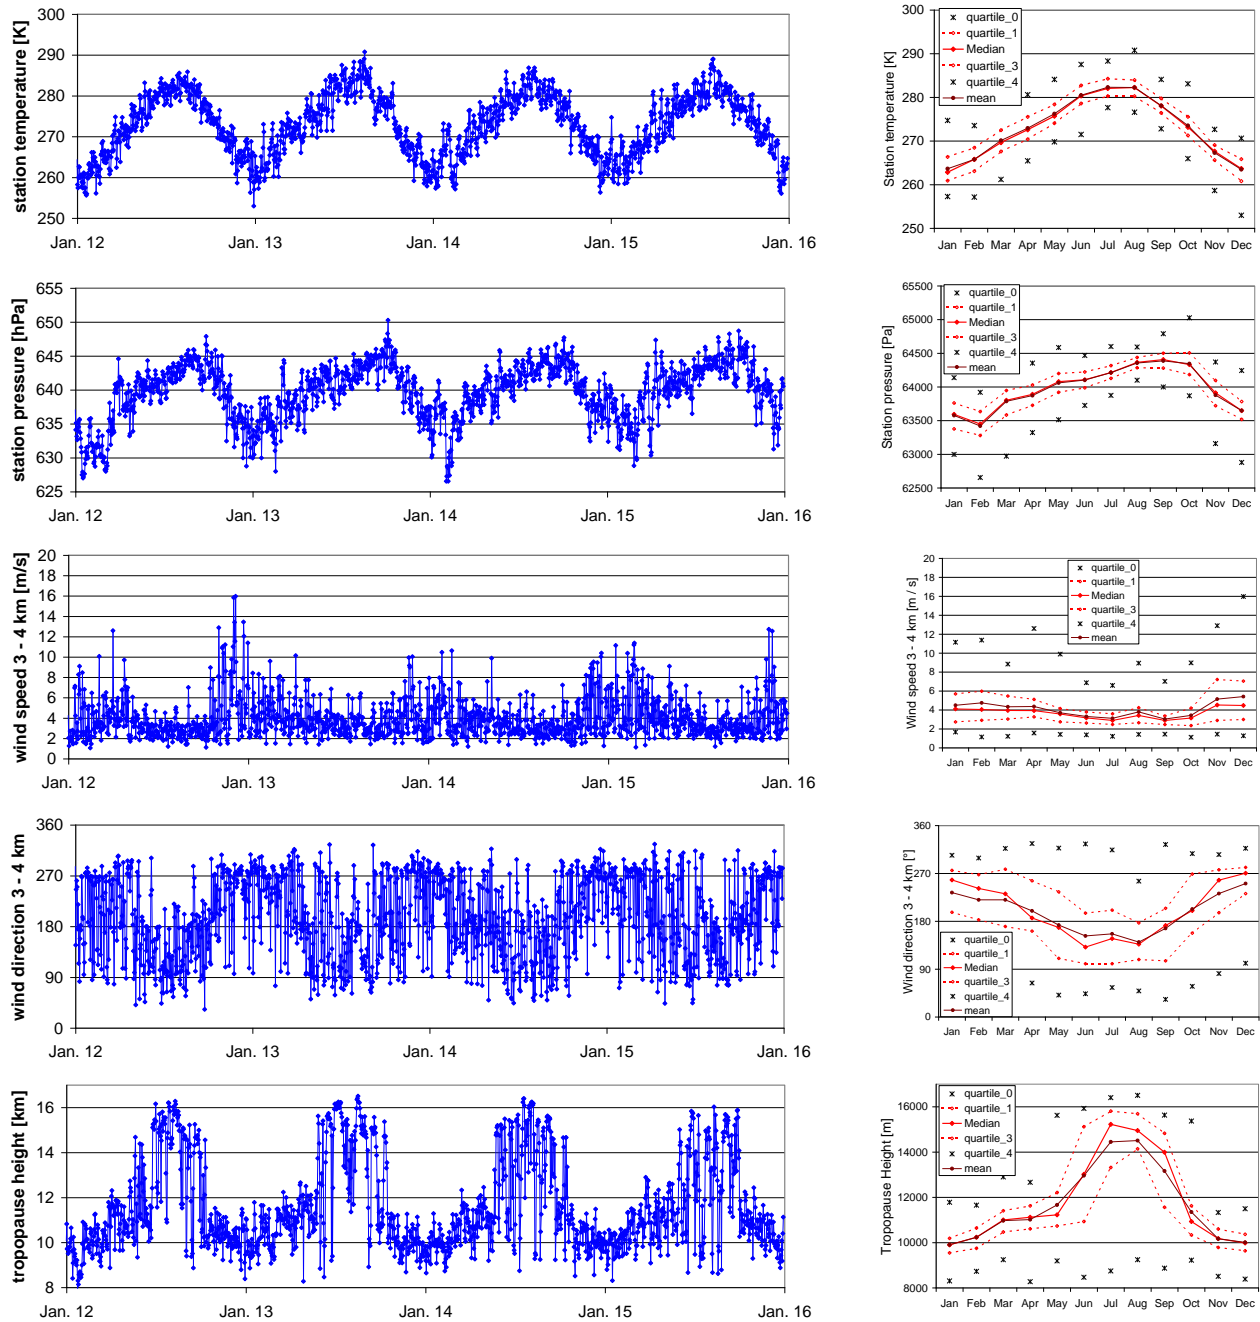

**Fig. S1 Left:** Time series of daily averaged values of different meteorological quantities at WLG station derived from ECMWF data (2012 to 2015), with ‘Jan 12’ referring to ‘1 Jan 2012’. **Right:** The corresponding seasonal cycles.

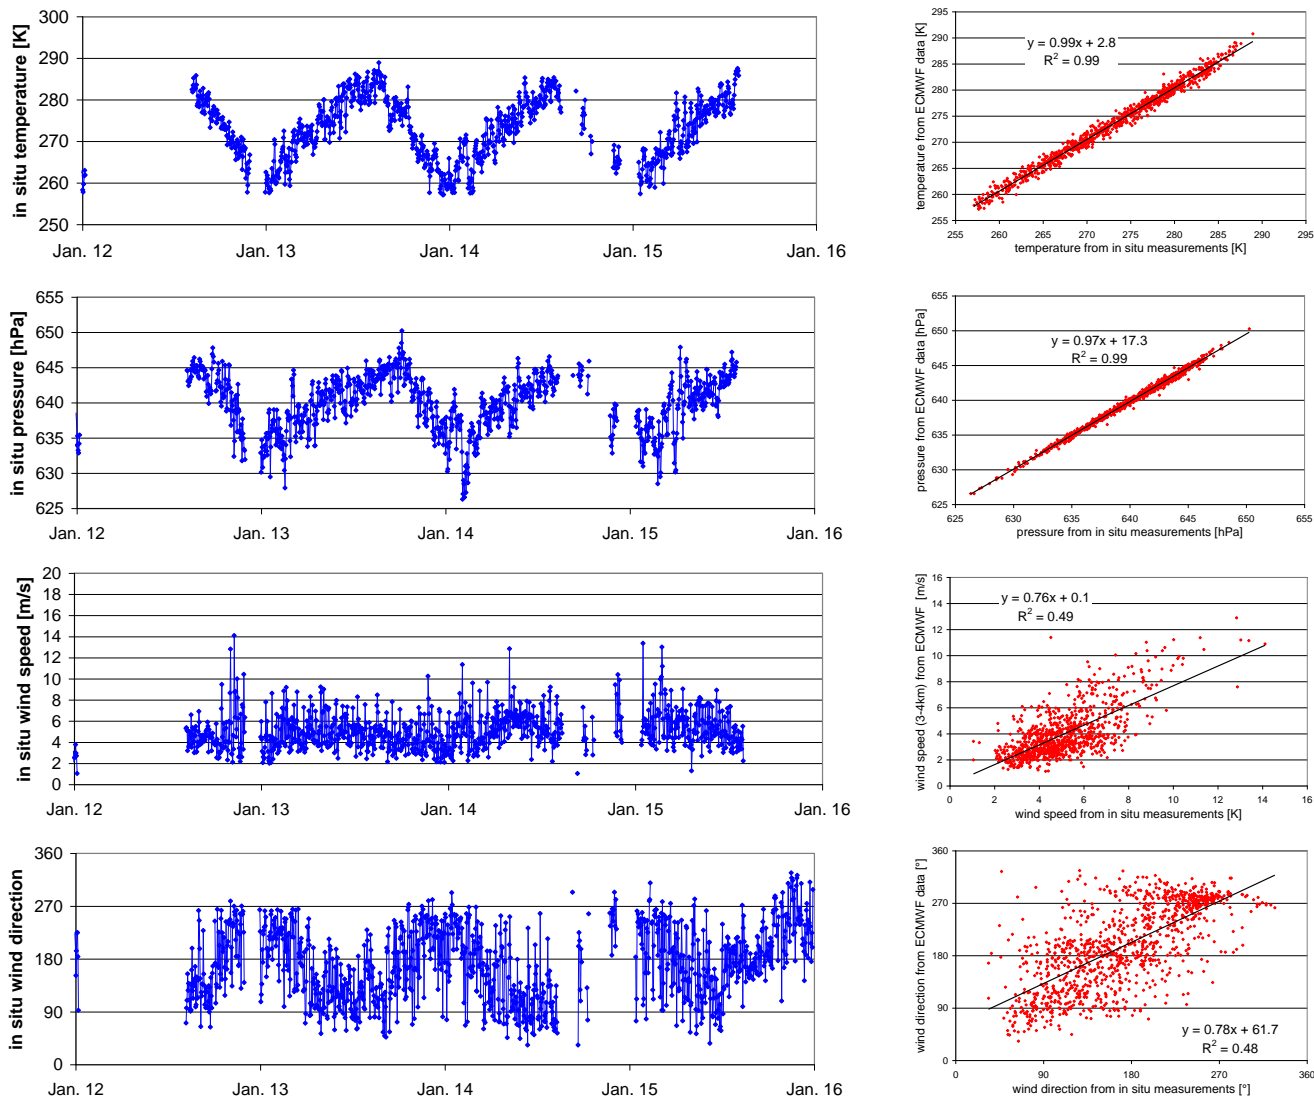

**Fig. S2 Left:** Time series of daily averaged meteorological data from the in situ measurements at WLG (2012 to 2015) , with ‘Jan 12’ referring to ‘1 Jan 2012’.. **Right:** Correlation plots of the ECMWF versus the corresponding in situ data.

## 2 Determination and correction of the elevation calibration

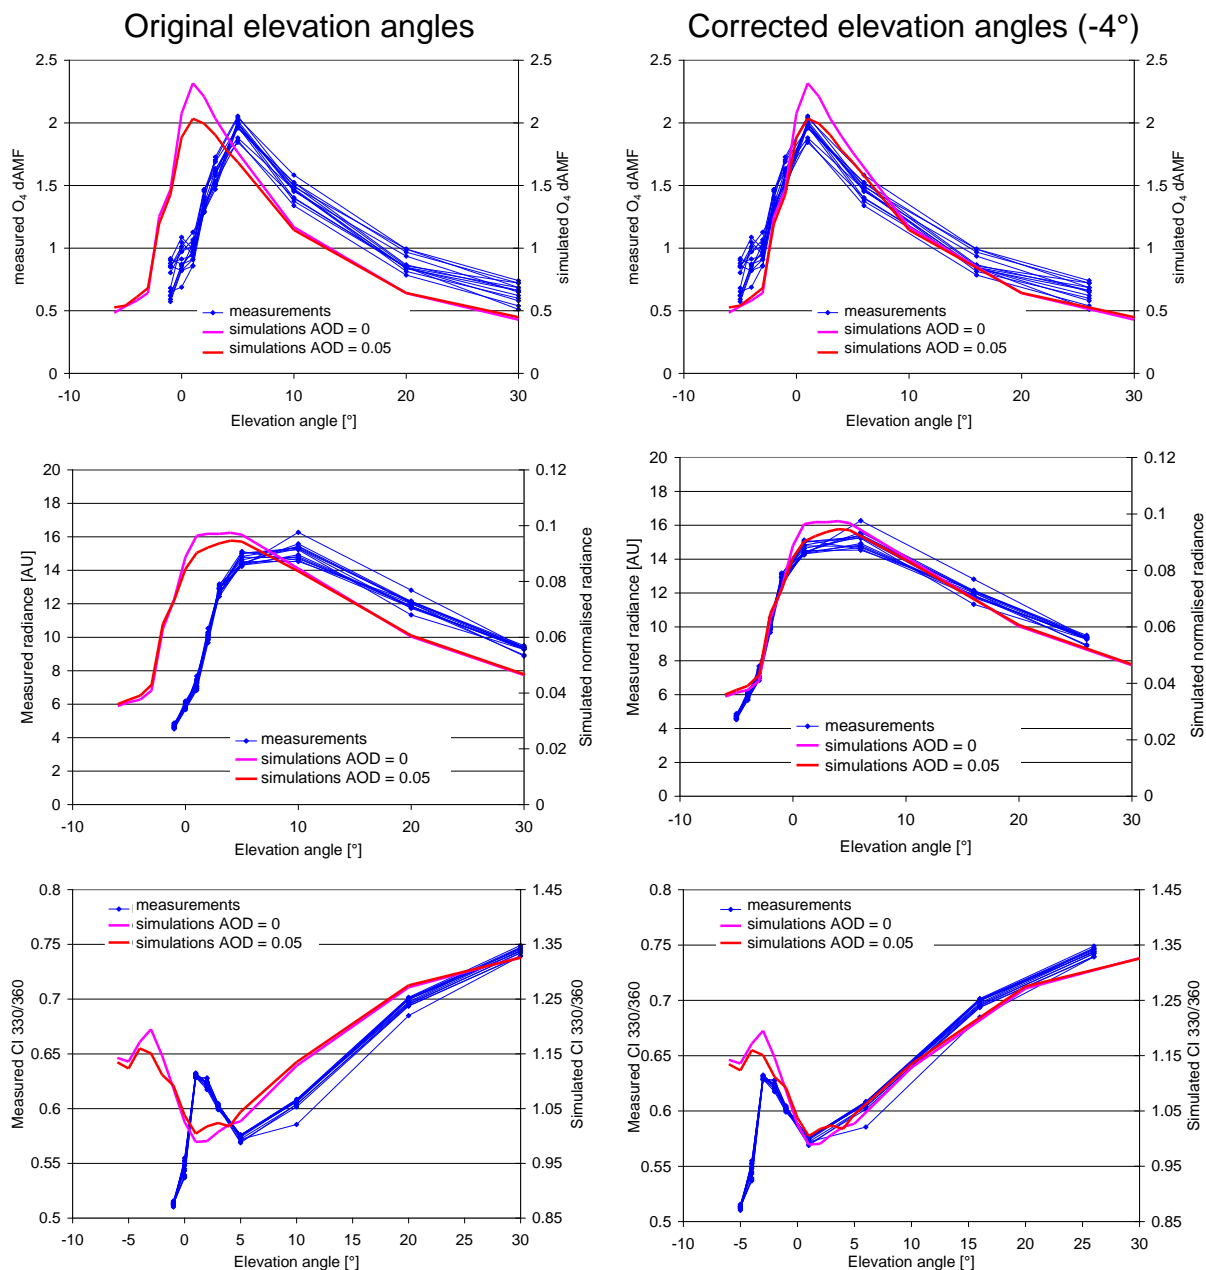

**Fig. S3** Comparison of simulated (magenta and red lines) and measured (blue lines)  $O_4$  absorption (expressed as  $O_4$  air mass factor), radiance at 360 nm, and colour index (CI) for 330 and 360 nm. For the comparison, measurements around noon on a clear day (14.04.2013) were selected. Simulations were made for two different aerosol loads (magenta: no aerosols, red: AOD = 0.05). The SZA is about  $30^\circ$ , and the relative azimuth angle is about  $180^\circ$ . **Left:** measurements are displayed as function of the original (wrong) elevation angle calibration. **Right:** The figures show the same data, but with the measurements as function of the corrected (by  $-4^\circ$ ) elevation angles.

### 3 Spectral retrieval

**Table S1.** Selected periods with different (stable) detector temperatures, which were selected for the data analysis

| Period                  | Number of days |
|-------------------------|----------------|
| 01.04.2012 – 30.06.2012 | ~60 days       |
| 19.07.2012 – 02.12.2012 | ~130 days      |
| 02.12.2012 – 24.06.2013 | ~200 days      |
| 24.06.2013 – 21.11.2013 | ~150 days      |
| 22.11.2013 – 07.03.2014 | ~100 days      |
| 02.04.2014 – 20.05.2014 | ~50 days       |
| 20.05.2014 – 01.10.2014 | ~130 days      |
| 17.10.2014 – 04.04.2015 | ~170 days      |
| <b>Total</b>            |                |
| 01.04.2012 – 04.04.2015 | ~990 days      |

#### 3.1 Averaging of individual spectra

5 Averaging of spectra increases the signal to noise ratio and thus reduces the statistical error of the spectral retrieval. In order to achieve a large reduction of the statistical error, as much as possible individual spectra should be averaged. However, besides the statistical errors also systematic errors occur, e.g. caused by imperfect correction of the Ring effect or different saturation levels of the detector. Such systematic errors tend to increase if an increasing number of spectra are averaged, because the solar zenith angle (and other atmospheric or instrumental properties) changes during the selected period. Thus it is important to find an ‘optimum number’ of individual spectra for the averaging, for which a minimum of the fit error is found.

10 In Fig. S4 the effect of averaging of different numbers of spectra on the RMS of the spectral analysis is shown. The analysis of spectra averaged from 10 original spectra leads to a strong reduction of the RMS (decreases by a factor of 2 to 3.5) compared to the results for individual spectra, indicating that for individual spectra the total error is dominated by noise. However, further averaging of spectra (40 original spectra) only leads to a rather small improvement of the RMS. Thus in this study, averages of 10 original spectra are analysed.

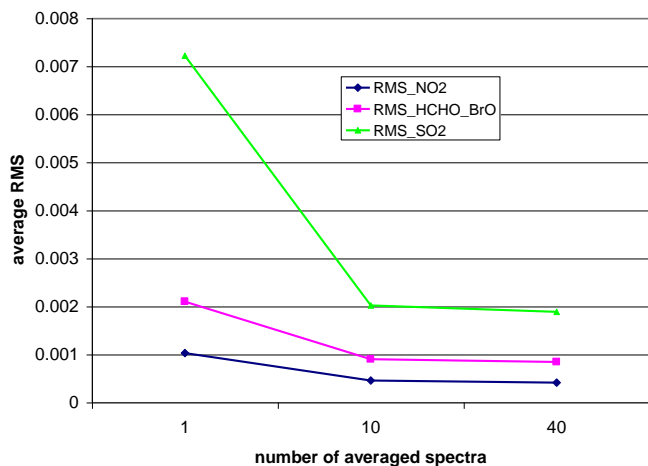

**Fig. S4** Mean RMS of the NO<sub>2</sub>, SO<sub>2</sub>, and HCHO and BrO analysis for spectra taken at 1 °, 6 °, and 16 ° elevation for clear sky measurements in April 2013 as function of the number of averaged spectra.

### 5 3.2 Choice of Fraunhofer reference spectra

Usually, spectra at high elevation angle (usually 90 °) and low solar zenith angle (SZA) are used as a Fraunhofer reference spectrum, because such measurements in general contain the smallest atmospheric absorptions. Such a choice was also first used for the analysis of the WLG measurements. However, it turned out that for zenith spectra larger fit errors occurred than for the spectra at low elevation angles (see Fig. S5 (right)). Moreover, also unreasonable results were obtained for the trace gas absorptions and the Ring effect (see Fig. S5 (left)). The main reason for the problems of the zenith spectra is probably that no black tube was mounted in front of the telescope lense. Thus direct sun light can fall on the telescope lense when the instrument points to zenith (since the instrument is directed towards the North, no direct sun light falls on the telescope for the low elevation angles). Part of the direct sun light will be scattered by the lense onto the fibre bundle and will be added to the ‘regular’ scattered sun light. If the lense is covered by dirt, the contribution of the direct sun light might be further increased. Here it should be noted that at the high altitude of the measurement site the contribution of direct sun light is substantially enhanced compared to measurements at sea level, because of the reduced molecular scattering in the atmosphere above the instrument.

The effect of the direct sun light is (at least) twofold:

1) the probability of Raman scattering (Ring effect) will be changed. Thus the correction of the Ring effect will work less good as for spectra of purely scattered sunlight, and spectral interferences with trace gas absorptions might appear. Here it is important to note that unrealistic values for 90 ° measurements were not only found for the Ring effect, but also for the absorptions of NO<sub>2</sub>, SO<sub>2</sub>, HCHO, and BrO.

2) the broad band spectral shape of the spectra changes, the spectra become more ‘reddish’. Thus spectrograph straylight will probably be enhanced compared to spectra of purely scattered sun light. Indeed, a much higher variation of the fitted intensity offset is found for spectra in 90 ° elevation than for the other elevation angles.



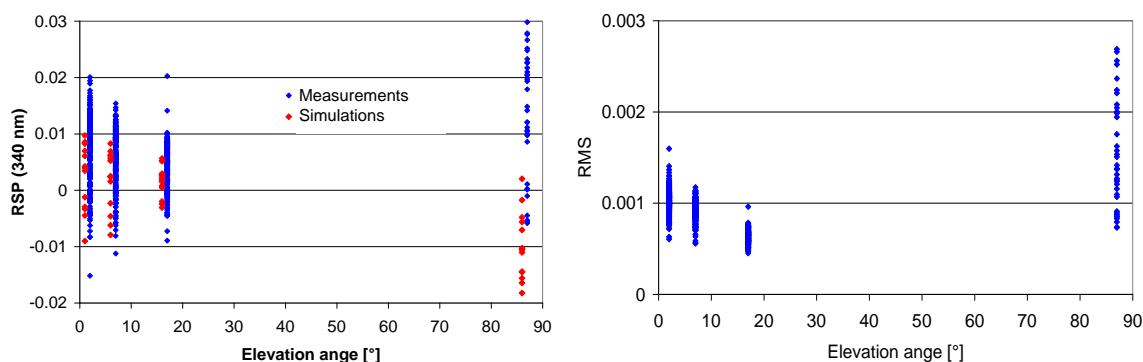

**Fig. S5 Left:** Results for the Ring effect (expressed as Raman scattering probability, RSP) as function of the elevation angle for measurements from 02 December 2012 to 24 June 2013 (blue) and derived from radiative transfer simulations (red). **Right:** RMS of the spectral fit for BrO and HCHO as function of the elevation angle for measurements from 02 December 2012 to 24 June 2013. The measurements were analyzed using Fraunhofer reference spectra taken at 26 ° of each elevation sequence.

In Fig. S5 (left) the measured Ring effect (expressed as Raman scattering probability, RSP) is compared to simulation results of a radiative transfer model. The measurements were analysed using individual Fraunhofer reference spectra taken at 26 ° elevation of each elevation sequence. Accordingly, also for the simulated RSP values, the corresponding results for 26 ° elevation were subtracted. The simulations were performed for SZA between 20 ° and 60 ° and relative azimuth angles between 60 ° and 180 °, which corresponds to the variation of both quantities for the selected measurements (02 December 2012 to 24 June 2013). The rather large scatter of the measured and simulated RSP values is mainly caused by the variations of these two quantities. In spite of the rather large scatter, still a large discrepancy between the measured and simulated RSP values is found for 90 ° elevation, while for the low elevation angles, the agreement is much better. Because of these findings, in this study no measurements at 90 ° elevation are used as Fraunhofer reference spectra. Instead, individual measurements at 26 ° elevation of each elevation sequence are used as Fraunhofer reference spectra.

20

### 3.3 Choice of spectral ranges for the different spectral analyses

**Table S2a** Fit settings for the NO<sub>2</sub> spectral analyses.

| <b>NO<sub>2</sub> analysis</b> |                                                 |
|--------------------------------|-------------------------------------------------|
| Wavelength range (nm)          | 399 – 426                                       |
| DOAS polynomial                | degree: 4                                       |
| Intensity offset               | degree: 2                                       |
| Gaps (nm)                      | 422.4 – 423.1                                   |
| Ring effect                    | Original and wavelength-dependent Ring spectrum |
| NO <sub>2</sub>                | 220 K, Vandaele et al. (2002)                   |
| O <sub>3</sub>                 | 223 K, Io corrected, Bogumil et al. (2003)      |
| RMS filter                     | 5e-4                                            |

5 **Table S2b** Fit settings for the SO<sub>2</sub> spectral analyses.

| <b>SO<sub>2</sub> analysis</b>        |                                                                                                                  |
|---------------------------------------|------------------------------------------------------------------------------------------------------------------|
| Wavelength range (nm)                 | 306 – 325                                                                                                        |
| DOAS polynomial                       | degree: 6                                                                                                        |
| Intensity offset                      | degree: 2                                                                                                        |
| Gaps (nm)                             | -                                                                                                                |
| Ring effect                           | Original and wavelength-dependent Ring spectrum                                                                  |
| SO <sub>2</sub>                       | 273 K, Bogumil et al. (2003)                                                                                     |
| NO <sub>2</sub>                       | 220 K, Vandaele et al. (2002)                                                                                    |
| O <sub>3</sub>                        | 223 K, Io corrected, Bogumil et al. (2003)                                                                       |
| O <sub>3</sub> , wavelength dependent | O <sub>3</sub> cross section multiplied with wavelength, orthogonalised to original O <sub>3</sub> cross section |
| RMS filter                            | 1.8e-3                                                                                                           |

**Table S2c** Fit settings for the BrO/HCHO spectral analyses.

| <b>BrO / HCHO analysis</b> |                                                 |
|----------------------------|-------------------------------------------------|
| Wavelength range (nm)      | 314 – 358                                       |
| DOAS polynomial            | degree: 8                                       |
| Intensity offset           | degree: 2                                       |
| Gaps (nm)                  | 331.4 – 331.6, 336.4 – 336.8, 349.0 – 349.3     |
| Ring effect                | Original and wavelength-dependent Ring spectrum |
| BrO                        | 228K, Wilmouth et al. (1999)                    |
| HCHO                       | 298K, Meller and Moortgat (2000)                |
| NO <sub>2</sub>            | 220 K, Vandaele et al. (2002)                   |
| O <sub>4</sub>             | 293 K, Thalman and Volkamer (2013)              |
| O <sub>3</sub>             | 223 K, Io corrected, Bogumil et al. (2003)      |
| RMS filter                 | 9e-4                                            |

**Table S2d** Fit settings for the O<sub>4</sub> spectral analyses.

| <b>O<sub>4</sub> analysis</b> |                                                 |
|-------------------------------|-------------------------------------------------|
| Wavelength range (nm)         | 352 – 387                                       |
| DOAS polynomial               | degree: 5                                       |
| Intensity offset              | degree: 2                                       |
| Gaps (nm)                     | -                                               |
| Ring effect                   | Original and wavelength-dependent Ring spectrum |
| O <sub>4</sub>                | 293 K, Thalman and Volkamer (2013)              |
| NO <sub>2</sub>               | 220 K, Vandaele et al. (2002)                   |
| O <sub>3</sub>                | 223 K, Io corrected, Bogumil et al. (2003)      |

5

### 3.3.1 Determination of the optimum fit range for NO<sub>2</sub>

For the NO<sub>2</sub> analysis the exact determination of the fit range is less critical than for SO<sub>2</sub>, HCHO, and BrO because of less atmospheric interfering. Moreover, the signal to noise ratio in the blue spectral range is larger than in the UV, and in particular it is more constant over the entire NO<sub>2</sub> fit range. Because of these reasons, less effort is spent on the determination of the NO<sub>2</sub> fit range, and in particular no synthetic spectra are used.

The spectral range of the instrument is 290 to 437 nm. Thus in principle a rather large spectral range from about 400 nm to 436 nm could be used. However, it turned out that large fit residuals occur for wavelength ranges with upper

boundaries  $> 427\text{nm}$  (and also below  $399\text{nm}$ , see Fig. S6). Thus for the  $\text{NO}_2$  analysis a fit range between about  $399$  and  $427\text{ nm}$  was chosen.

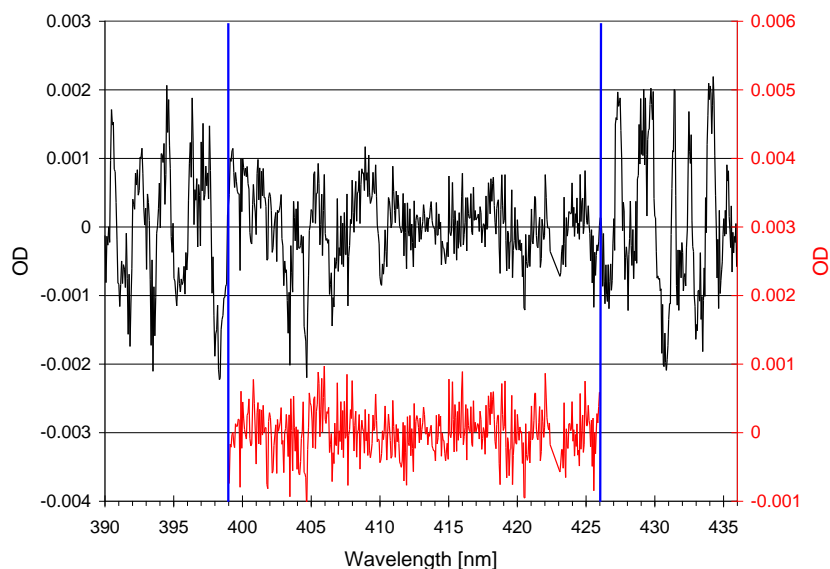

5 **Fig. S6** Fit residuals for a  $\text{NO}_2$  fit in two wavelength ranges (black:  $390 - 436\text{nm}$ , left y-axis; red:  $399 - 426\text{ nm}$ , right y-axis). The measurement (average of 10 individual measurements) was taken on 2 December 2012, 04:51 to 7:00. The (average) SZA and elevation angle were  $59.3^\circ$  and  $6^\circ$ , respectively. The residual of the large spectral range shows strong systematic structures below  $400\text{nm}$  and above  $427\text{ nm}$  (RMS:  $7.8\text{e-}4$ ). The residual of the small spectral range shows much less systematic structures (RMS:  $3.5\text{e-}4$ ). The blue lines indicate the lower and upper boundaries of the  
10 finally chosen fit range  $399 - 426\text{nm}$ .

To further specify the lower and upper fit boundaries, the RMS, fit errors, and the standard deviation for  $1^\circ$  elevation angle were derived for clear sky observations. The dependencies of these quantities on variations of the upper and lower fit boundaries are shown in Fig. S7. As expected, only weak dependencies were found. The final  
15 choice of the fit range was  $399 - 426$ , because for that range the fit error and the standard deviation for measurements at  $1^\circ$  elevation were found to be smallest. However, the results for the other investigated fit ranges are very similar (the deviations are between  $-2\text{e}14$  and  $+4\text{e}14\text{ molec/cm}^3$ , see Fig. S7).

20

25

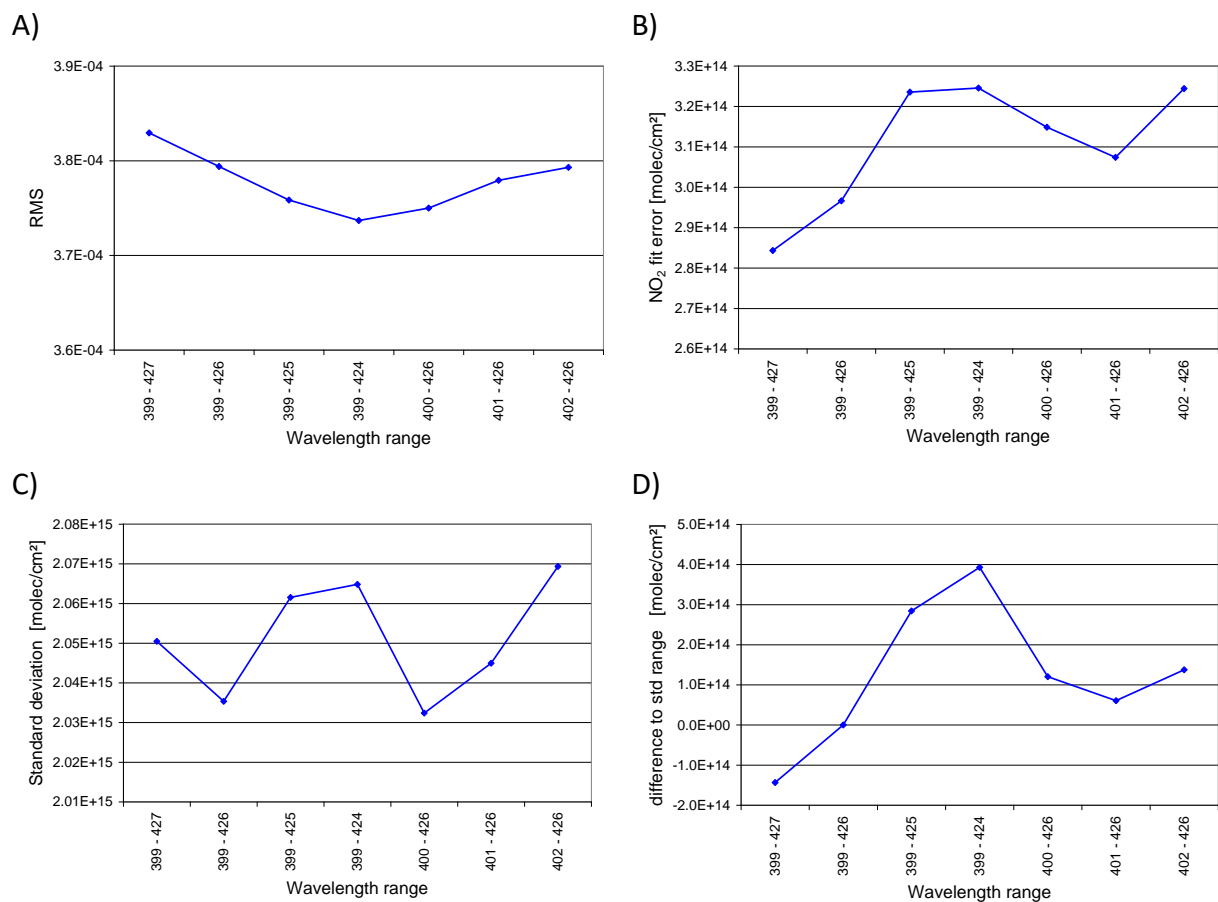

**Fig. S7** Comparison of the fit results for different NO<sub>2</sub> fit ranges. **A)** Mean RMS; **B)** Mean NO<sub>2</sub> fit error; **C)** Standard deviation of NO<sub>2</sub> dSCDs for 1° elevation angle; **D)** Mean difference of the NO<sub>2</sub> dSCDs with respect to the results for the fit range 399 – 426 nm.

5

### *Error estimate*

The systematic and random uncertainties of the fit results for individual spectra (average of 10 original spectra) are summarized in [Table S3](#).

10 The systematic error of the dSCDs is usually dominated by systematic effects of the spectral retrieval. These systematic effects are quantified by the comparison of the fit results for the different spectral ranges. Only for high trace gas dSCDs the uncertainty of the cross section might become important. But for the rather low NO<sub>2</sub> dSCDs retrieved in this study the uncertainty of the cross section can be neglected.

15 For individual measurements, the random errors dominate the total uncertainty. However, if several measurements are averaged these errors can be largely reduced.

**Table S3** overview on the different systematic and random error sources

| error source                                                | error of NO <sub>2</sub> fit result |
|-------------------------------------------------------------|-------------------------------------|
| <b>systematic errors</b>                                    |                                     |
| Deviation of NO <sub>2</sub> dSCDs for different fit ranges | 6e14 molec/cm <sup>2</sup>          |
| <b>random errors</b>                                        |                                     |
| Fit error                                                   | 3e14 molec/cm <sup>2</sup>          |
| Standard deviation*                                         | 2e15 molec/cm <sup>2</sup>          |

\*the standard deviation describes the total statistical error; at least part of the total statistical error is caused by the fit error.

5

### *Quality filter*

10 Spectra with bad fit quality have to be removed from further processing. First, measurements with a small number of individual scans (<800) are removed. This filter removes the worst fit results. In addition, a RMS filter is applied. Here a threshold for the RMS of 5e-4 is chosen. **Figure S8** shows the frequency distribution of the RMS (for measurements with more than 800 scans). The RMS threshold removes about 10% of the NO<sub>2</sub> results.

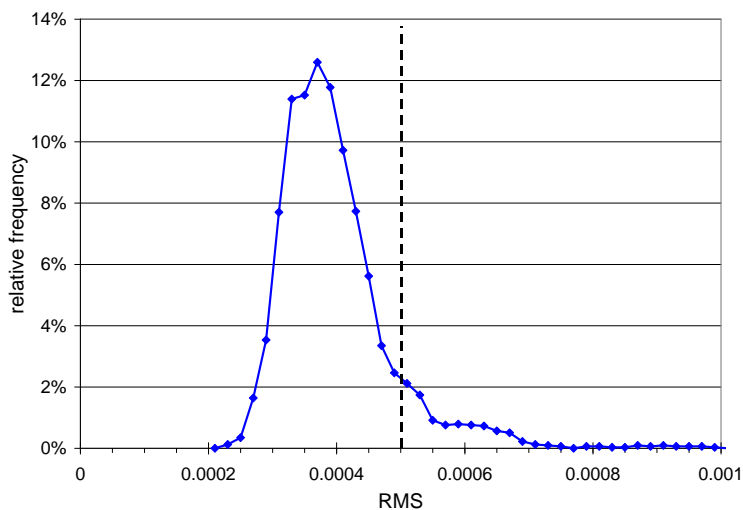

15 **Fig. S8** Frequency distribution of the RMS of the spectral analysis of NO<sub>2</sub> for clear sky conditions. The vertical line indicates the threshold (0.0005) for removing measurements with high fit errors.

### 3.3.2 Determination of the optimum fit range for SO<sub>2</sub>

In this task both synthetic and measured spectra are used. Different tests are performed to find the best suited fit range for both species. The results are summarized in [Table S4](#) below. Based on these results a fit range from 306 to 325 nm was chosen. The individual tests are described in more detail below.

**Table S4** Best fit ranges based on different test results.

| Test                                                                                                          | Optimum lower fit limit for SO <sub>2</sub> (nm) | Optimum upper fit limit for SO <sub>2</sub> (nm) |
|---------------------------------------------------------------------------------------------------------------|--------------------------------------------------|--------------------------------------------------|
| Comparison with input values of synthetic spectra                                                             | 304 – 308                                        | 323 – 327                                        |
| Consistency between synthetic and measured spectra                                                            | 306 – 307                                        | 323 – 327                                        |
| Fit error<br>(in brackets: results for synthetic spectra)                                                     | 305 – 306<br>(304)                               | 323 – 327<br>(323 – 327)                         |
| RMS<br>(in brackets: results for synthetic spectra)                                                           | 308<br>(304)                                     | 323 – 327<br>(323 – 327)                         |
| scatter of results for 1° elevation angle<br>(in brackets: results for synthetic spectra)                     | 306 – 307<br>(304)                               | 323 – 327<br>(325 – 327)                         |
| correlation between BrO and HCHO dSCDs for 1° elevation angle<br>(in brackets: results for synthetic spectra) | 304 & 306<br>(308)                               | 323 – 327<br>(325 – 327)                         |
|                                                                                                               |                                                  |                                                  |
| <b>Final selection</b>                                                                                        | <b>306</b>                                       | <b>325</b>                                       |

#### *Synthetic and measured spectra*

- 10 The same data sets as for the BrO and HCHO analysis are used also for the determination of the fit range of SO<sub>2</sub> (see [Supplement Sect. 3.3.3](#)). Since no SO<sub>2</sub> absorptions are included in the simulation of the synthetic spectra, also the derived SO<sub>2</sub> dSCDs should be (close to) zero.

#### *Dependence of the retrieved SO<sub>2</sub> dSCDs on the upper and lower fit boundaries*

- 15 [Figure S9](#) shows results for 1° elevation angle (similar results are found for the other elevation angles). In addition to the results for the measured spectra (red lines), also the results for the synthetic spectra (blue lines) together with the ‘true dSCDs’ (blue dashed lines) are shown. The individual figures show the results for one value of the upper limit of the fit range. The x-axes indicate the lower limit of the fit range. For the comparison between the results for measured and synthetic spectra it has to be taken into account that the true atmospheric profiles are not known. They might especially differ from the profiles assumed for the simulation of the synthetic spectra (zero SO<sub>2</sub> absorption). Thus no
- 20

perfect quantitative agreement can be expected. And indeed, the derived SO<sub>2</sub> dSCDs from the measured spectra differ substantially (by up to 2e16 molec/cm<sup>3</sup>) from those of the synthetic spectra. Also the dependence on the lower fit boundary is very different for measured and synthetic spectra. While the retrieved dSCDs for the synthetic spectra are close to zero, the retrieved dSCDs for the measured show as well negative as positive values. The differences of the results for synthetic and measured spectra indicate that the measurements are strongly influenced by factors like instrumental properties, which don't affect the synthetic spectra. For both data sets, the smallest deviations from zero are found for lower fit boundaries of 306 and 307 nm. The choice of the upper fit boundary has almost no influence on the derived SO<sub>2</sub> dSCDs. The much stronger influence of the choice of the lower fit boundary is expected, because of several reasons:

5

10

- the SO<sub>2</sub> absorptions increase strongly towards short wavelengths
- the radiance decreases strongly towards short wavelengths
- the O<sub>3</sub> absorption strongly increases towards short wavelengths



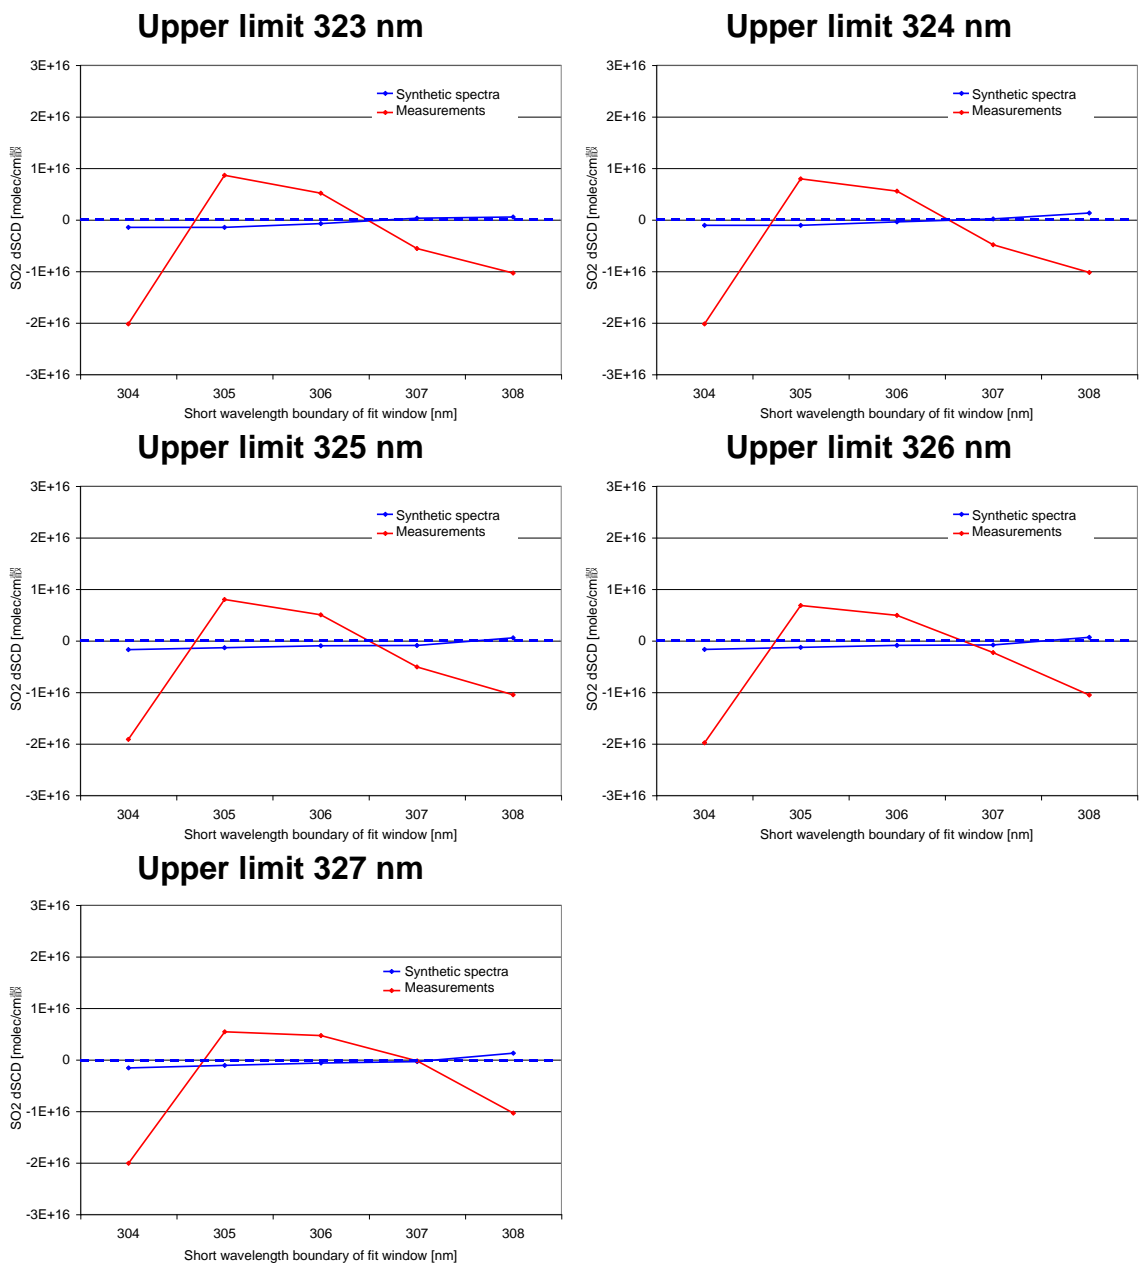

**Fig. S9** Dependence of the fit results (for 1 ° elevation) for the measured spectra (red lines) and synthetic spectra (blue lines) on the upper and lower boundaries of the fit range. Also shown are the ‘true dSCDs’ derived from the simulated air mass factors (blue dashed lines). The individual plots represent results for one fixed upper wavelength limit. The lower wavelength limit is represented by the x-axes.

## Fit error and RMS

Figure S10 shows the SO<sub>2</sub> fit errors and RMS for synthetic (left) and measured spectra (right). Like for the analysis of BrO and HCHO, also for SO<sub>2</sub> systematically higher fit errors and RMS are found for the measured spectra. However, compared to BrO and HCHO, the difference is much larger for SO<sub>2</sub>. This again indicates that the analysis of the measured spectra in the SO<sub>2</sub> analysis range is strongly affected by effects, which are not included in the simulation of the synthetic spectra (e.g. imperfect cross section, imperfect convolution). Thus for SO<sub>2</sub>, only limited conclusions can be drawn from the synthetic spectra for the analysis of the real spectra. From the results of the measured spectra, the best lower limit of the fit range is probably found at about 305 – 306 nm (fit error) and 308 (RMS). For the upper limit of the fit range no clear dependence is found.

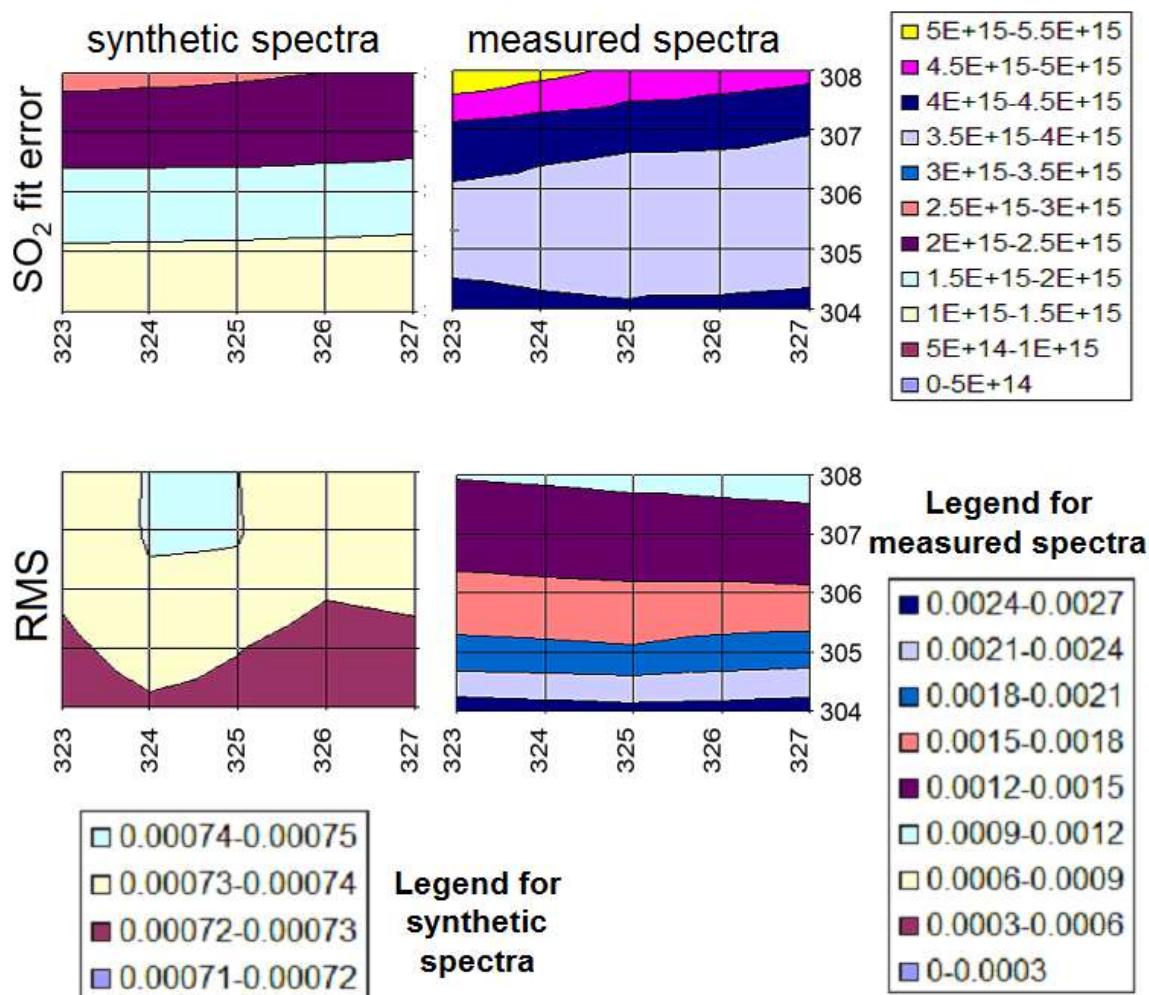

**Fig. S10** Dependence of the SO<sub>2</sub> fit errors and RMS on the upper and lower boundaries of the fit range for the synthetic (left) and measured spectra (right).

### *Standard deviation of the retrieved dSCDs and correlation between the dSCDs of SO<sub>2</sub> and O<sub>3</sub>*

In this section, the temporal variability of the derived SO<sub>2</sub> dSCDs and the correlation between the dSCDs of SO<sub>2</sub> and O<sub>3</sub> for 1° elevation are investigated. Although we don't make specific use of the O<sub>3</sub> retrieval results in this study, the correlation between the dSCDs of SO<sub>2</sub> and O<sub>3</sub> can be used to assess the quality of the SO<sub>2</sub> fit results. For the synthetic spectra the retrieved SO<sub>2</sub> dSCDs should be (close to) zero, because no SO<sub>2</sub> absorption was included in the simulation of the synthetic spectra. Also the O<sub>3</sub> absorption of all spectra should be the same. Accordingly, the correlation between the dSCDs of SO<sub>2</sub> and O<sub>3</sub> should also be (close to) zero. Some temporal variation is of course expected because of the added noise. For the measurements, the atmospheric trace gas concentrations can vary, and also changes of the atmospheric visibility might further contribute to a variation of the measured trace gas dSCDs. Thus the retrieved variability of the trace gas dSCDs for the measured spectra is expected to be higher than for the synthetic dSCDs. For the measured spectra, an (anti-) correlation of the derived dSCDs of SO<sub>2</sub> and O<sub>3</sub> might also reflect a (anti-) correlation of their true atmospheric absorptions. However, this is not very probably given the rather different profile shapes and formation processes. Thus a low correlation between the dSCDs of SO<sub>2</sub> is considered as an indication for a good fit quality also for the measured spectra.

Figure S11 shows the standard deviation of the time series of the SO<sub>2</sub> dSCDs for 1° elevation angle as well as the correlation coefficient between the dSCDs of SO<sub>2</sub> and O<sub>3</sub> for the synthetic (left) and measured spectra (right). As expected the standard deviations are higher for the measured spectra. Also the correlation between both species is higher for the measured spectra. Like for the fit error and the RMS, the differences between the results for the synthetic and measured spectra are much higher than for the BrO and HCHO analysis. This again indicates that for SO<sub>2</sub>, only limited conclusions can be drawn from the synthetic spectra for the analysis of the real spectra. From the results of the measured spectra, the best lower limit of the fit range is found to be about 306 – 307 nm (SO<sub>2</sub> std) and 304 or 306 (correlation). For the upper limit of the fit range no clear dependence is found.

25

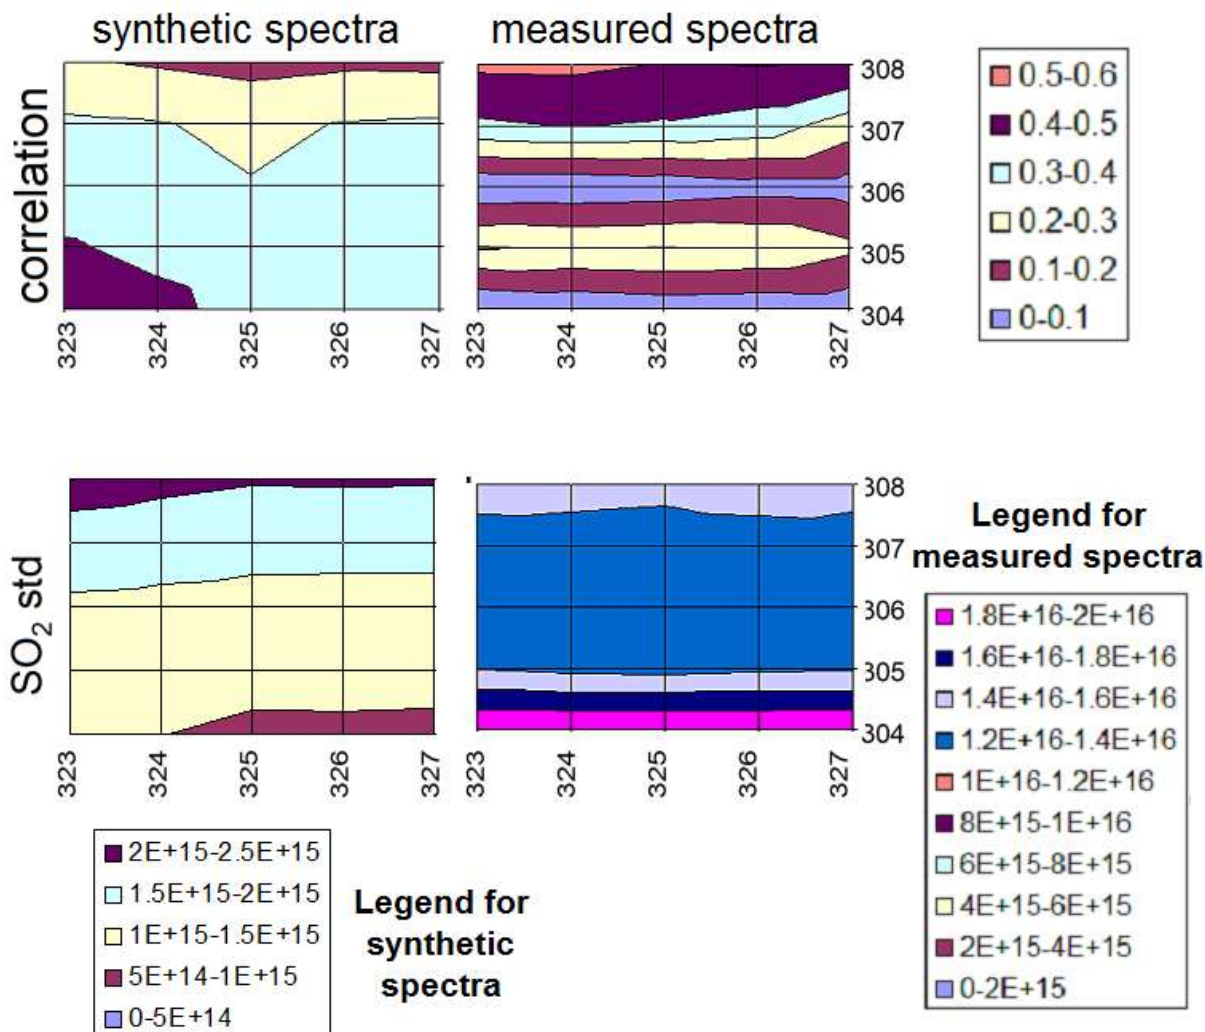

**Fig. S11** Dependence of the variation (expressed as standard deviation) of the derived SO<sub>2</sub> dSCDs for 1° elevation angle and the correlation between the SO<sub>2</sub> and O<sub>3</sub> dSCDs (expressed as  $r$ ) on the upper and lower boundaries of the fit range (**left:** synthetic spectra; **right:** measured spectra).

5

### *Final choice of fit the range*

Based on the results from the previous sub section, the fit range from 306 to 325 nm is chosen for the analysis of SO<sub>2</sub>. This choice is mainly based on the results for the measured spectra, because the synthetic spectra were found to be not representative for the real measurements (see discussion above). For the chosen fit range the lowest values of the fit error, the standard deviation of the SO<sub>2</sub> dSCD and the correlation between the dSCDs of SO<sub>2</sub> and O<sub>3</sub> were found.

10

## *Error estimate*

The systematic and random uncertainties of the fit results for individual spectra (average of 10 original spectra) are summarized in [Table S5](#).

5

**Table S5** overview on the different systematic and random error sources

| <b>error source</b>                                                         | <b>error of SO<sub>2</sub> fit result</b> |
|-----------------------------------------------------------------------------|-------------------------------------------|
| <b>systematic errors</b>                                                    |                                           |
| Comparison of the fit results for the synthetic spectra to the 'true dSCDs' | 8e15 molec/cm <sup>2</sup>                |
| <b>random errors</b>                                                        |                                           |
| Fit error                                                                   | 4e15 molec/cm <sup>2</sup>                |
| Standard deviation*                                                         | 1.3e16 molec/cm <sup>2</sup>              |

\*the standard deviation describes the total statistical error; at least part of the total statistical error is caused by the fit error.

10 The systematic error of the dSCDs is usually dominated by systematic effects of the spectral retrieval. These systematic effects are quantified by the comparison of the fit results for the measured and synthetic spectra. Only for high trace gas dSCDs the uncertainty of the cross section might become important. But for the rather low SO<sub>2</sub> dSCDs retrieved in this study the uncertainty of the cross section can be neglected.

15 For individual measurements, the random errors dominate the total uncertainty. However, if several measurements are averaged these errors can be largely reduced.

## *Quality filter*

20 Spectra with bad fit quality have to be removed from further processing. First, measurements with a small number of individual scans (<800) are removed. This filter removes the worst fit results. In addition, a RMS filter is applied. Here a threshold for the RMS of 1.8e-3 is chosen. [Figure S12](#) shows the frequency distribution of the RMS (for measurements with more than 800 scans). The RMS threshold removes about 24% of the SO<sub>2</sub> results.

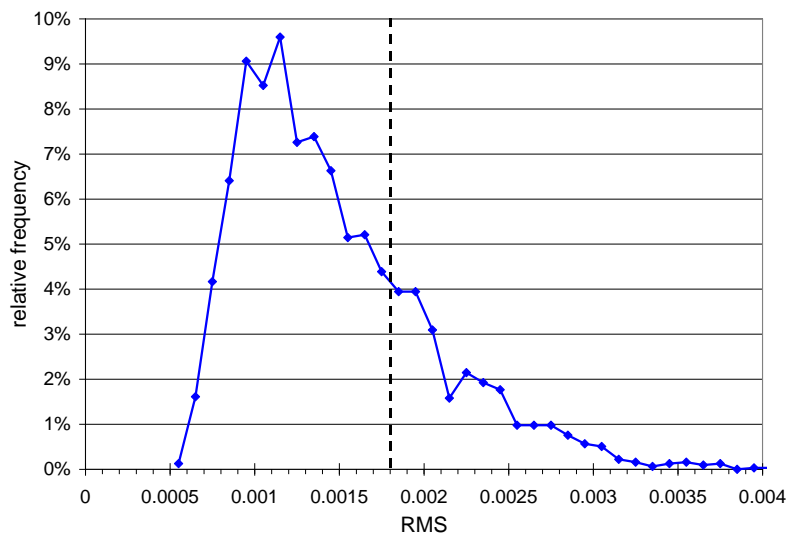

**Fig. S12** Frequency distribution of the RMS of the spectral analysis of SO<sub>2</sub> for clear sky conditions. The vertical line indicates the threshold (0.0018) for removing measurements with high fit errors.

5

### 3.3.3 Determination of the optimum fit range for HCHO and BrO

For this task both synthetic and measured spectra are used. Different tests are performed to find the best suited fit range for both species. The results are summarized in [Table S6](#) below. Based on these results, a fit range from 314 to 358 nm was chosen. The individual tests are described in more detail below.

10

**Table S6** Best fit ranges based on different test results.

| Test                                                                                                       | Optimum lower fit limit for HCHO (nm) | Optimum upper fit limit for HCHO (nm) | Optimum lower fit limit for BrO (nm) | Optimum upper fit limit for BrO (nm) |
|------------------------------------------------------------------------------------------------------------|---------------------------------------|---------------------------------------|--------------------------------------|--------------------------------------|
| Comparison with input values of synthetic spectra                                                          | 313 – 314                             | 356 – 360                             | 314 – 316                            | 356 – 360                            |
| Consistency between synthetic and measured spectra                                                         | 314 - 316                             | 358 – 359                             | 314 – 316                            | 357 – 358                            |
| Fit error (in brackets: results for synthetic spectra)                                                     | 312 – 317                             | 358                                   | 312 – 318 (312 – 316)                | 357 – 358 (358 – 360)                |
| RMS (in brackets: results for synthetic spectra)                                                           | 316 – 318 (314 – 318)                 | 356 – 358 (356 – 360)                 | 316 – 318 (314 – 318)                | 356 – 358 (356 – 360)                |
| scatter of results for 1° elevation angle (in brackets: results for synthetic spectra)                     | 316 (312 – 317)                       | 358 – 360 (356 – 358)                 | 315 – 316 (312 – 313)                | 358 – 360 (358 – 360)                |
| correlation between BrO and HCHO dSCDs for 1° elevation angle (in brackets: results for synthetic spectra) | 312 – 313 (313 – 318)                 | 358 – 360 (312 – 313)                 | 312 – 313 (313 – 318)                | 358 – 360 (312 – 313)                |
|                                                                                                            |                                       |                                       |                                      |                                      |
| <b>Final selection</b>                                                                                     | <b>314</b>                            | <b>358</b>                            | <b>314</b>                           | <b>358</b>                           |

### *Synthetic spectra*

5

Synthetic spectra were simulated at high spectral resolution for the spectral range 303 – 390 nm using the RTM SCIATRAN. Rotational Raman scattering was included. The simulations were performed for a SZA of 50° and a relative azimuth angle (RAA) of 180°. Surface albedo and altitude were set to 0.07 and 3800m, respectively.

10 An aerosol layer between 3800 and 4800m with an AOD of 0.1 was assumed. The single scattering albedo and phase function were chosen according to biomass burning aerosols. For the ozone absorption the temperature dependence was taken into account. Information about the chosen trace gas cross sections and assumed atmospheric profiles is given in [Table S7](#).

The Radiance output is convoluted with a Gaussian function with FWHM of 0.6 nm. Random noise with a RMS of 5e-4 is added to the convoluted spectra. 100 spectra with different noise are simulated for each elevation angle.

15 In addition to the simulated spectra, also air mass factors are derived from the RTM for the following wavelengths: 315, 340, 355 nm. The resulting dSCDs for BrO and HCHO are shown in [Fig. S13](#). The dSCDs are calculated assuming a Fraunhofer reference spectrum measured at 26° elevation angle. The dSCDs derived in this way are compared to the results of the spectral analyses. For this comparison, the analysis results of the 100 spectra for each elevation angle are averaged. For BrO and HCHO the dSCDs calculated for 340 nm are used for the comparison.

20

**Table S7** Trace gas cross sections and atmospheric profiles used for the synthetic spectra

| Trace gas       | Cross section                                                                                    | Atmospheric profile                                                                                                                                |
|-----------------|--------------------------------------------------------------------------------------------------|----------------------------------------------------------------------------------------------------------------------------------------------------|
| NO <sub>2</sub> | NO2_vandaele97_220_vac.txt                                                                       | Box profile in the lowest 0.5km. VCD: 1e15 molec/cm <sup>2</sup> ; stratospheric profile with maximum at 24 km. VCD: 5.22e15 molec/cm <sup>2</sup> |
| HCHO            | HCHO_Meller_298_vac.DAT                                                                          | Box profile in the lowest 1km. VCD: 1e15 molec/cm <sup>2</sup>                                                                                     |
| BrO             | bro_wil_228_vac.txt                                                                              | stratospheric profile with maximum at 20 km. VCD: 3e13 molec/cm <sup>2</sup>                                                                       |
| O <sub>3</sub>  | O3_203K_V3_0.dat<br>O3_223K_V3_0.dat<br>O3_243K_V3_0.dat<br>O3_273K_V3_0.dat<br>O3_293K_V3_0.dat | From the US standard atmosphere: maximum at 22km. VCD: 9.03e18 molec/cm <sup>2</sup> (337 DU)                                                      |
| O <sub>4</sub>  | o4_thalman_volkamer_293K_corr.xs                                                                 | O <sub>4</sub> derived from temperature and pressure profile                                                                                       |

Interestingly, different elevation dependencies are found for both trace gases (Fig. S13). For BrO, the dSCDs decrease towards low elevation angles. This is caused by the fact that in the RTM simulations BrO is only located in the stratosphere. Measurements at 26° elevation (Fraunhofer reference spectra) are more sensitive to these altitudes than measurements at low elevation angles. Thus, for low elevation angles, negative BrO dSCDs are obtained. For HCHO, the opposite elevation dependence is found, because HCHO is only located in the troposphere.

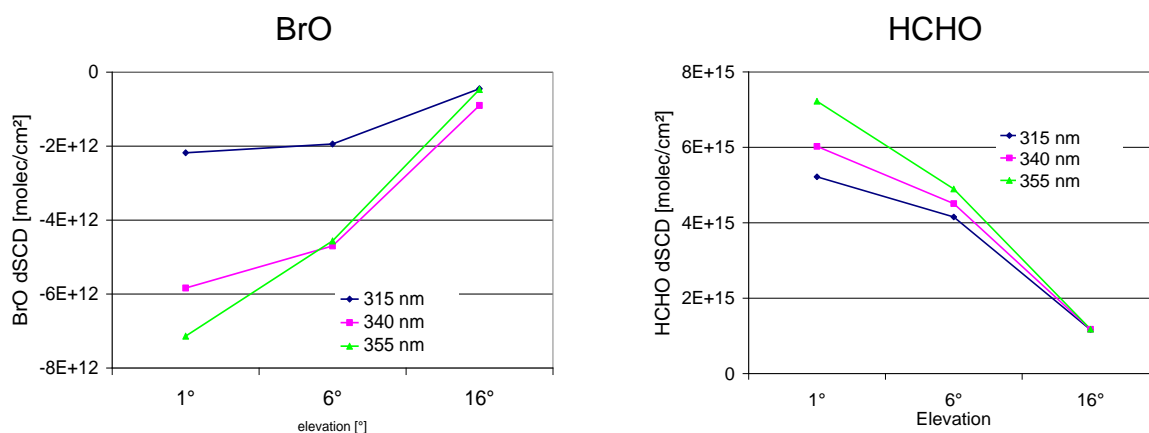

**Fig. S13** Dependence of the simulated trace gas dSCDs for BrO (left) and HCHO (right) on the elevation angle for different wavelengths used for the AMF calculations.

### Measured spectra

Measurements for the period 02.12.2012 – 24.06.2013 were selected. This period covers ~200 days in different seasons. For the analysis of the measured spectra the same settings as for the synthetic spectra were used. Only measurements for clear sky and with scan numbers > 800 were considered.



## Dependence of the retrieved BrO and HCHO dSCDs on the upper and lower fit boundaries

Figure S14 shows results for 1 ° elevation angle (similar results are found for the other elevation angles). In addition to the results for the measured spectra (red lines), also the results for the synthetic spectra (blue lines) together with the ‘true dSCDs’ (blue dashed lines) are shown.

Upper limit 360 nm  
Upper limit 359 nm  
Upper limit 358 nm

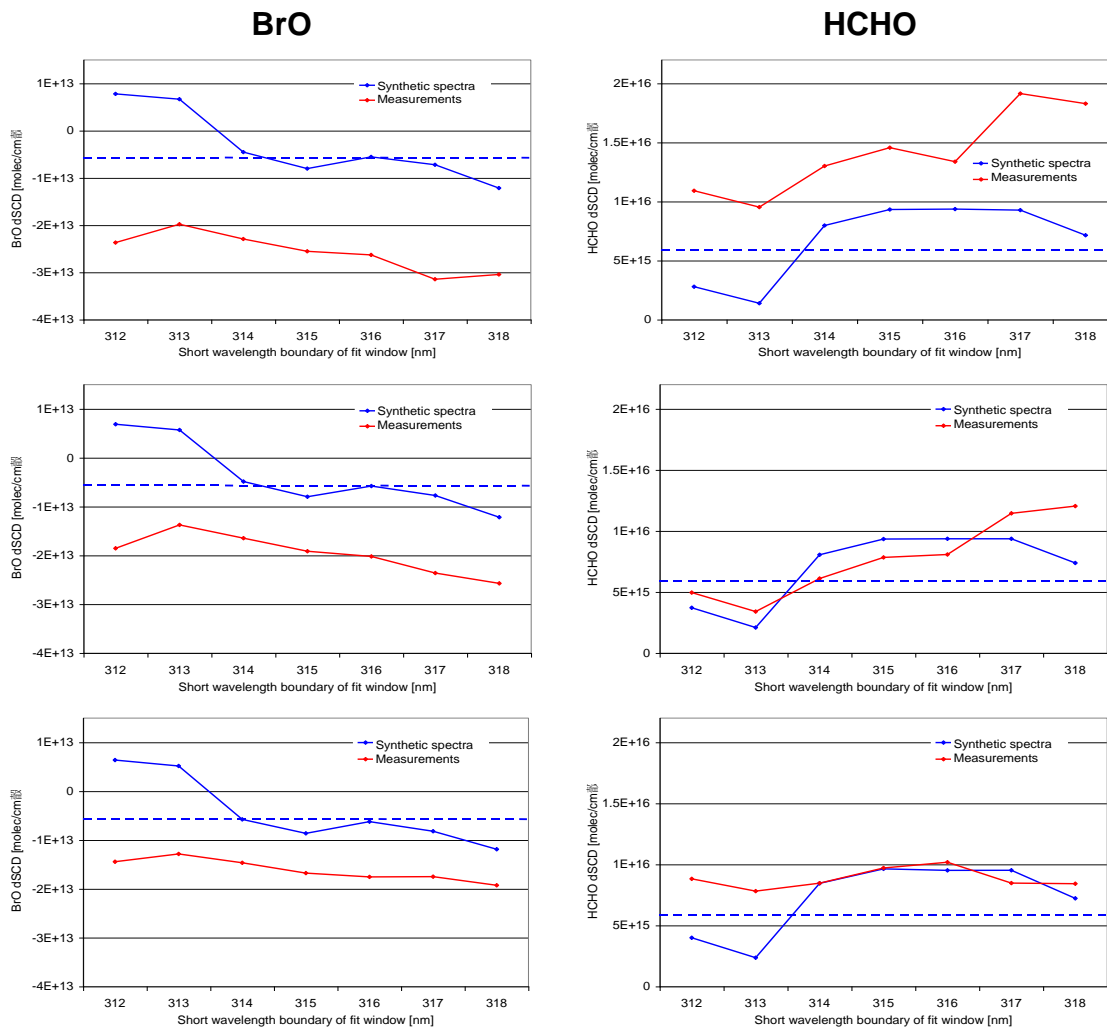

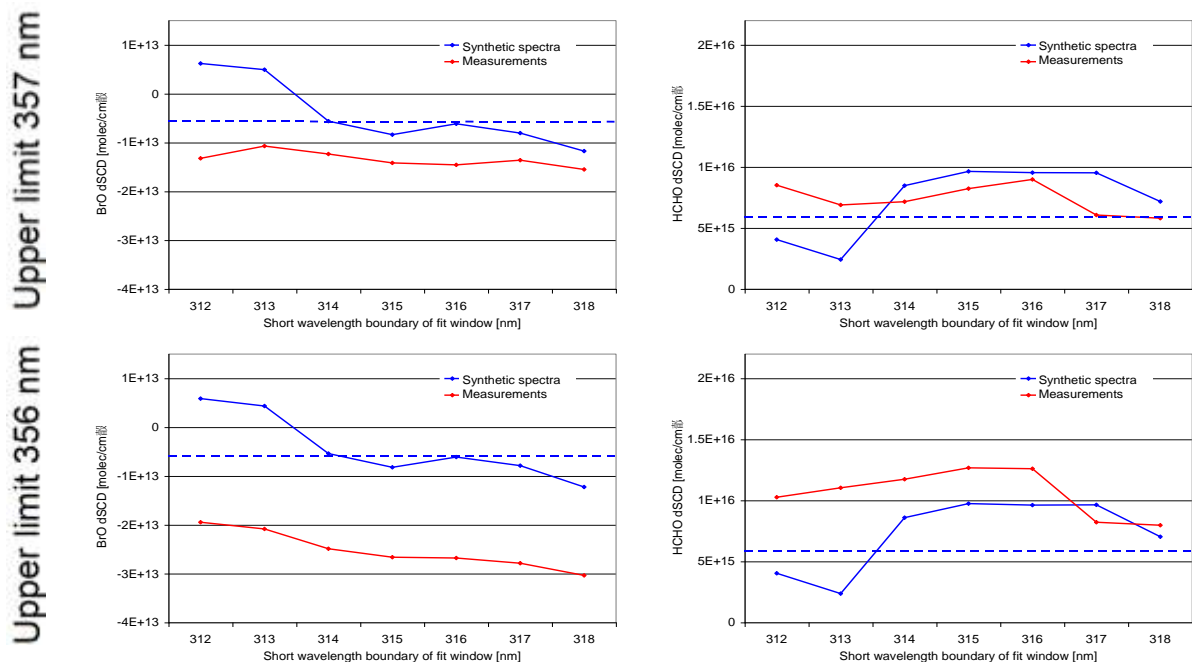

**Fig. S14** Dependence of the fit results (at  $1^\circ$  elevation angle) for the measured spectra (red lines) and synthetic spectra (blue lines) on the upper and lower boundaries of the fit range. Also shown are the ‘true dSCDs’ derived from the simulated air mass factors (blue dashed lines). The individual plots represent results for one fixed upper wavelength limit. The lower wavelength limit is represented by the x-axes.

5

The individual figures show the results for one value of the upper limit of the fit range. The x-axes indicate the lower limit of the fit range. For the comparison of the results for measured and synthetic spectra it has to be taken into account that the true atmospheric profiles are not known. They might especially differ from the profiles assumed for the simulation of the synthetic spectra. Thus no perfect quantitative agreement can be expected. However, it is meaningful to compare the overall dependencies on the upper and lower limits of the fit ranges. Here quite good agreement is found (except for the lowest values for the lower fit boundary) indicating that the results for the synthetic spectra are well representative also for the measured spectra. For BrO the best agreement between the results of the synthetic spectra and the ‘true dSCDs’ is found for lower limits between 314 and 316 nm, while for the upper limits no clear dependency is found. For HCHO the best agreement between the results of the synthetic spectra and the ‘true dSCDs’ is found for lower limits between 313 and 316 nm. Again, for the upper limits no clear dependency is found.

10

15

### **Fit error and RMS**

The errors of the BrO and HCHO dSCDs and RMS values derived from the fit are investigated for the measured and synthetic spectra. While for a fixed wavelength range, an increasing RMS is usually also accompanied by an increasing fit error, both quantities might depend differently on the variation of the fit boundaries. Fig. S15 shows the fit errors and RMS for synthetic (left) and measured spectra (right). In general, systematically higher fit errors and

20

RMS are found for the measured spectra. This probably indicates higher noise levels, but also additional systematic errors, caused e.g. by imperfect convolution, errors of the input cross sections, or remaining temperature dependencies.

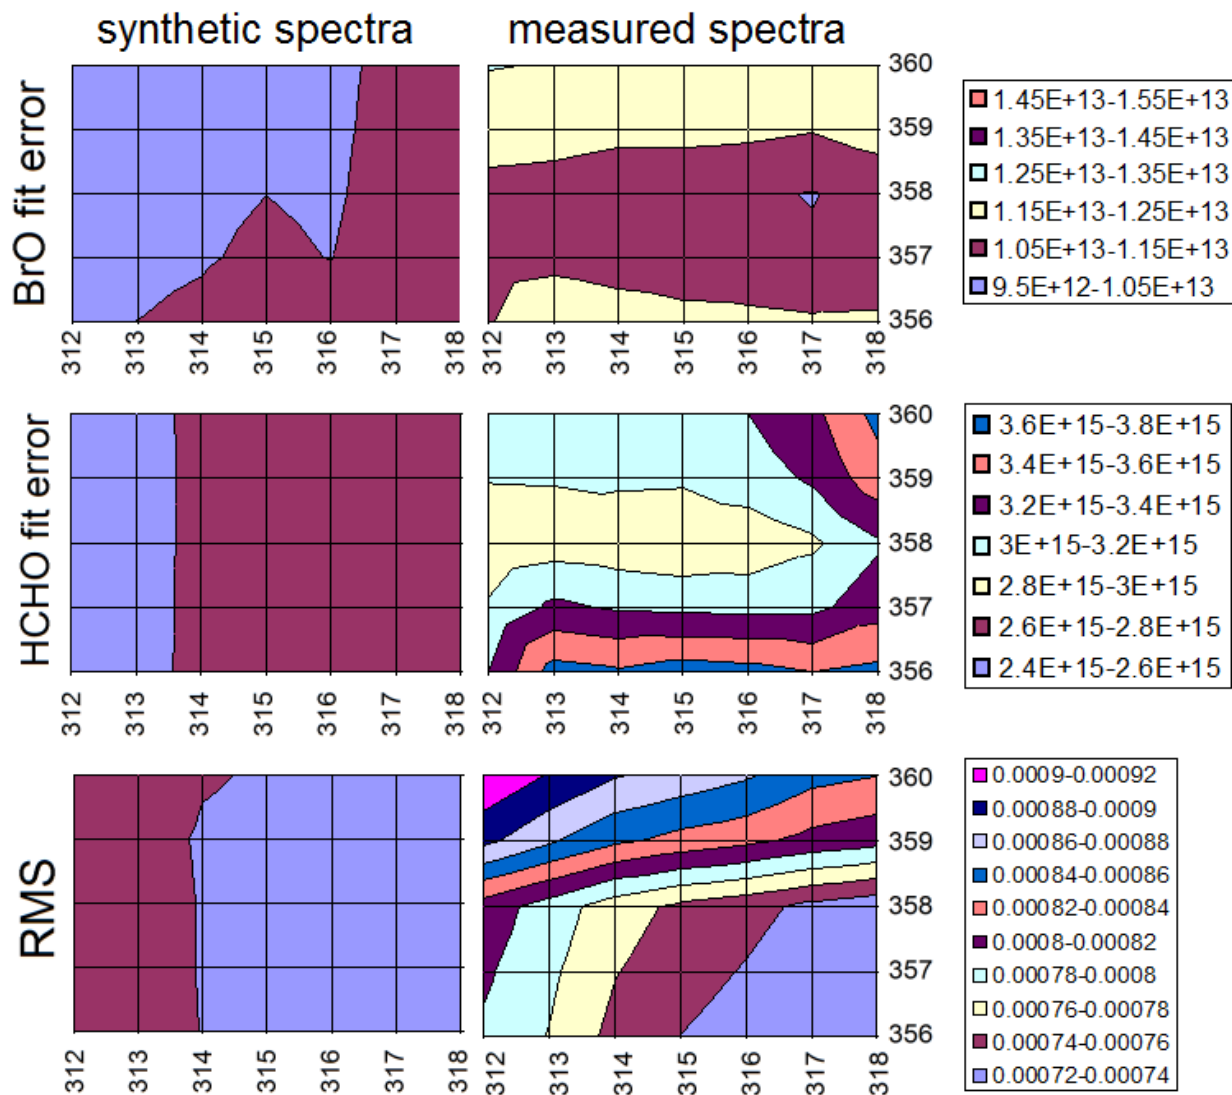

5

**Fig. S15** Dependence of the fit errors and RMS on the upper and lower boundaries of the fit range for the synthetic (left) and measured spectra (right).

### *Standard deviation of the retrieved dSCDs and correlation between the dSCDs of BrO and HCHO*

In this section, the temporal variability of the fit results is investigated. For this task, the results for 1 ° elevation are chosen, because they are expected to show the highest trace gas dSCDs and the largest variability. Since for the synthetic spectra the same input profiles are used for all spectra, the same trace gas dSCDs should be retrieved. Moreover, no correlation between the dSCDs of BrO and HCHO is expected. However, since noise was added to the synthetic spectra, also the derived trace gas dSCDs might be affected by some random variation, leading eventually also to some correlation between the dSCDs of BrO and HCHO.

For the measurements, also the atmospheric trace gas concentrations can vary. Moreover, also changes of the atmospheric visibility will probably contribute to a variation of the measured trace gas dSCDs. Thus the retrieved variability of the trace gas dSCDs for the measured spectra is expected to be higher than for the synthetic dSCDs. For the measured spectra, a (anti-) correlation of the derived dSCDs of BrO and HCHO might reflect a (anti-) correlation of their true atmospheric absorptions. However, such a (anti-) correlation is not very probable because of the rather different atmospheric profile shapes and formation processes. Thus a low correlation between the dSCDs of BrO and HCHO is considered as an indication for a good fit quality for both the synthetic and measured spectra.

Figure S16 shows the standard deviation of the time series of the dSCDs of BrO and HCHO for 1 ° elevation angle as well as the correlation coefficient between both dSCDs for the synthetic (left) and measured spectra (right). As expected the standard deviations are higher for the measured spectra. Also the correlation between both species is higher for the measured spectra. This finding might partly represent a true correlation of the atmospheric abundances, but is more probably caused by the noise of the spectra.

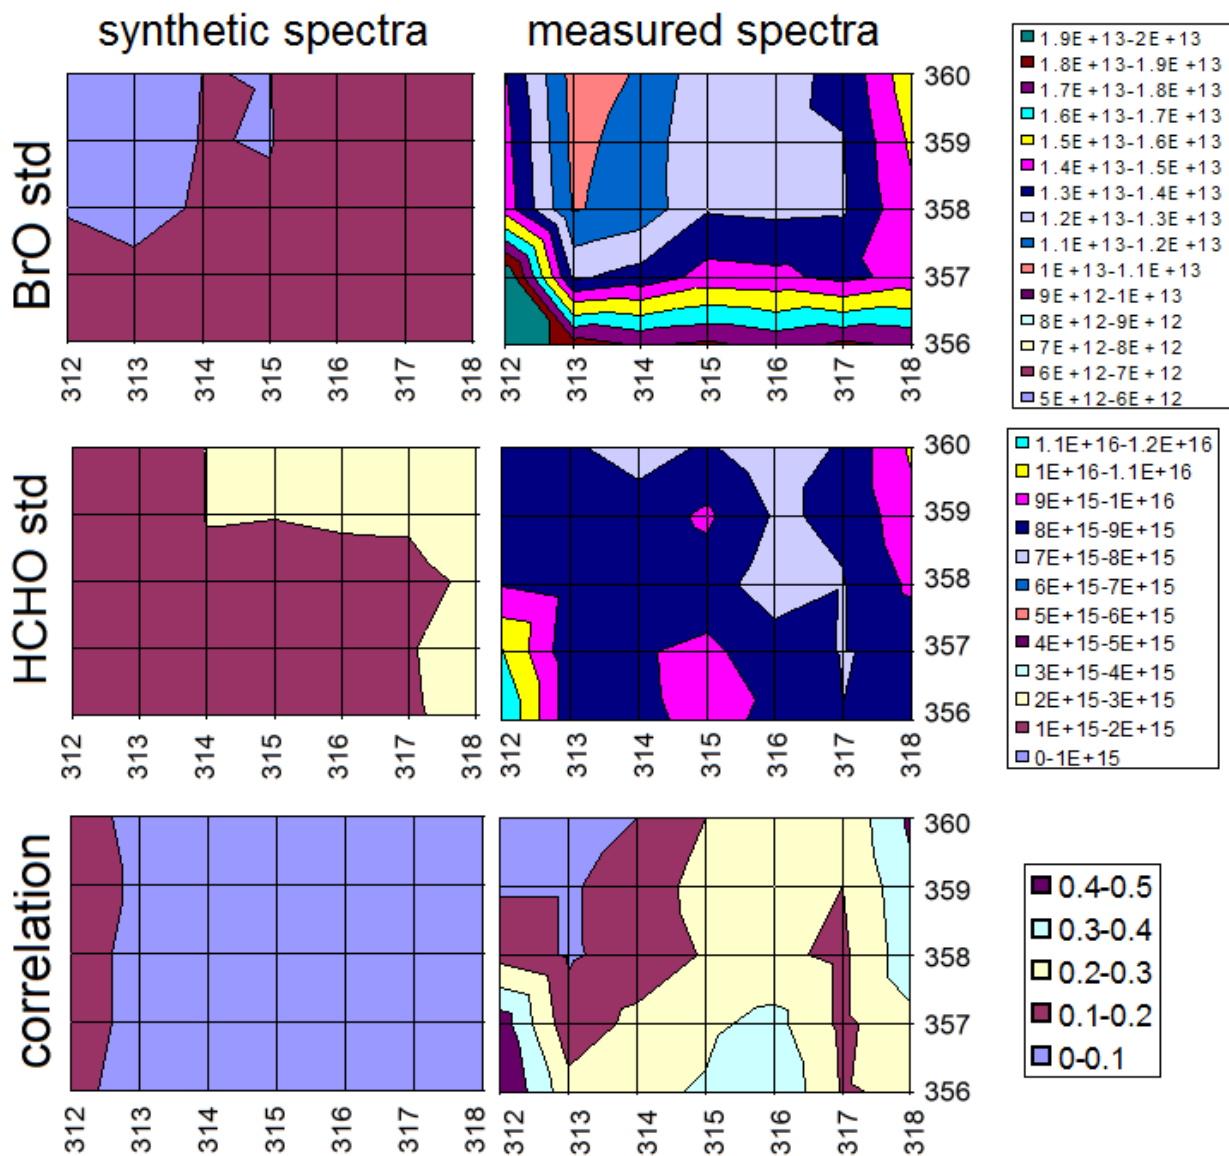

**Fig. S16** Dependence of the variation (expressed as standard deviation) of the fit results for 1° elevation angle and the correlation between the BrO and HCHO dSCDs (expressed as  $r$ ) on the upper and lower boundaries of the fit range. For the synthetic (**left**) and measured spectra (**right**).

5

### *Final choice of fit the range*

Based on the results from the previous sub-section, the fit range from 314 to 358 nm is chosen for the analysis of BrO and HCHO. This choice is mainly based on the results of the comparison of the retrieved trace gas dSCDs derived from the synthetic spectra to the dSCDs derived from the measured spectra and the 'true dSCDs'. For the chosen fit

range, also the fit errors, the standard deviation of the dSCDs (for 1 °elevation), and the correlation between the dSCDs of BrO and HCHO are rather small.

### *Error estimate*

5

The systematic and random uncertainties of the fit results for individual spectra (average of 10 original spectra) are summarized in [Table S8](#).

**Table S8** overview on the different systematic and random error sources

| error source                                                                | error of BrO fit result      | error of BrO fit result    |
|-----------------------------------------------------------------------------|------------------------------|----------------------------|
| <b>systematic errors</b>                                                    |                              |                            |
| Comparison of the fit results for the synthetic spectra to the 'true dSCDs' | 3e12 molec/cm <sup>2</sup>   | 4e15 molec/cm <sup>2</sup> |
| <b>random errors</b>                                                        |                              |                            |
| Fit error                                                                   | 1.1e13 molec/cm <sup>2</sup> | 3e15 molec/cm <sup>2</sup> |
| Standard deviation*                                                         | 1.1e13 molec/cm <sup>2</sup> | 9e15 molec/cm <sup>2</sup> |

10 \*the standard deviation describes the total statistical error; at least part of the total statistical error is caused by the fit error.

15 The systematic error of the dSCDs is usually dominated by systematic effects of the spectral retrieval, which are quantified by the comparison of the fit results for the synthetic spectra to the 'true dSCDs'. Only for high trace gas dSCDs the uncertainty of the cross section might become important. But for the rather low trace gas dSCDs retrieved in this study the uncertainty of the cross section can be neglected.

For individual measurements, the random errors clearly dominate the total uncertainty. However, if several measurements are averaged these errors can be largely reduced.

20

### *Quality filter*

25 Spectra with bad fit quality have to be removed from further processing. First, measurements with a small number of individual scans (<800) are removed. This filter removes spectra with the worst fit results. In addition, a RMS filter is applied. Here a threshold for the RMS of 9e-4 is chosen. [Figure S17](#) shows the frequency distribution of the RMS (for measurements with more than 800 scans). The RMS threshold removes about 24% of the BrO and HCHO results.

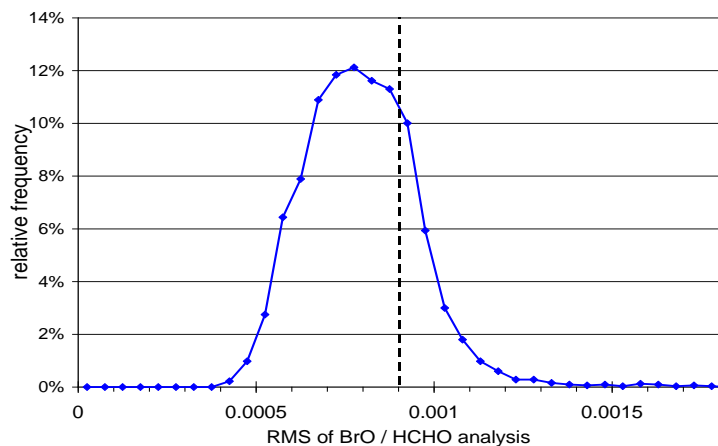

**Fig. S17** frequency distribution of the RMS of the spectral analysis of BrO and HCHO for clear sky conditions. The vertical line indicates the threshold for removing measurements with high fit errors.

5 |

## 4 Input trace gas profiles for the radiative transfer simulations

### 4.1. NO<sub>2</sub>, SO<sub>2</sub> and HCHO

- 10 For these trace gases vertical concentration profiles are determined assuming a constant mixing ratio throughout the atmosphere. Of course this is a rather strong simplification of the true profiles, which usually have much more complex shapes. But based on this simple assumption it is still possible to estimate the approximate tropospheric trace gas mixing ratios of NO<sub>2</sub>, SO<sub>2</sub>, and HCHO from the corresponding measured trace gas dSCDs. In [Fig. S18](#) the trace gas concentration profiles used in the RTM simulations are shown. They are calculated for typical background mixing ratios of the trace gases. However, it should be noted that the exact knowledge of the true mixing ratio is not important, because for these weak atmospheric absorbers, the air mass factors are almost independent from the absolute trace gas concentrations.
- 15

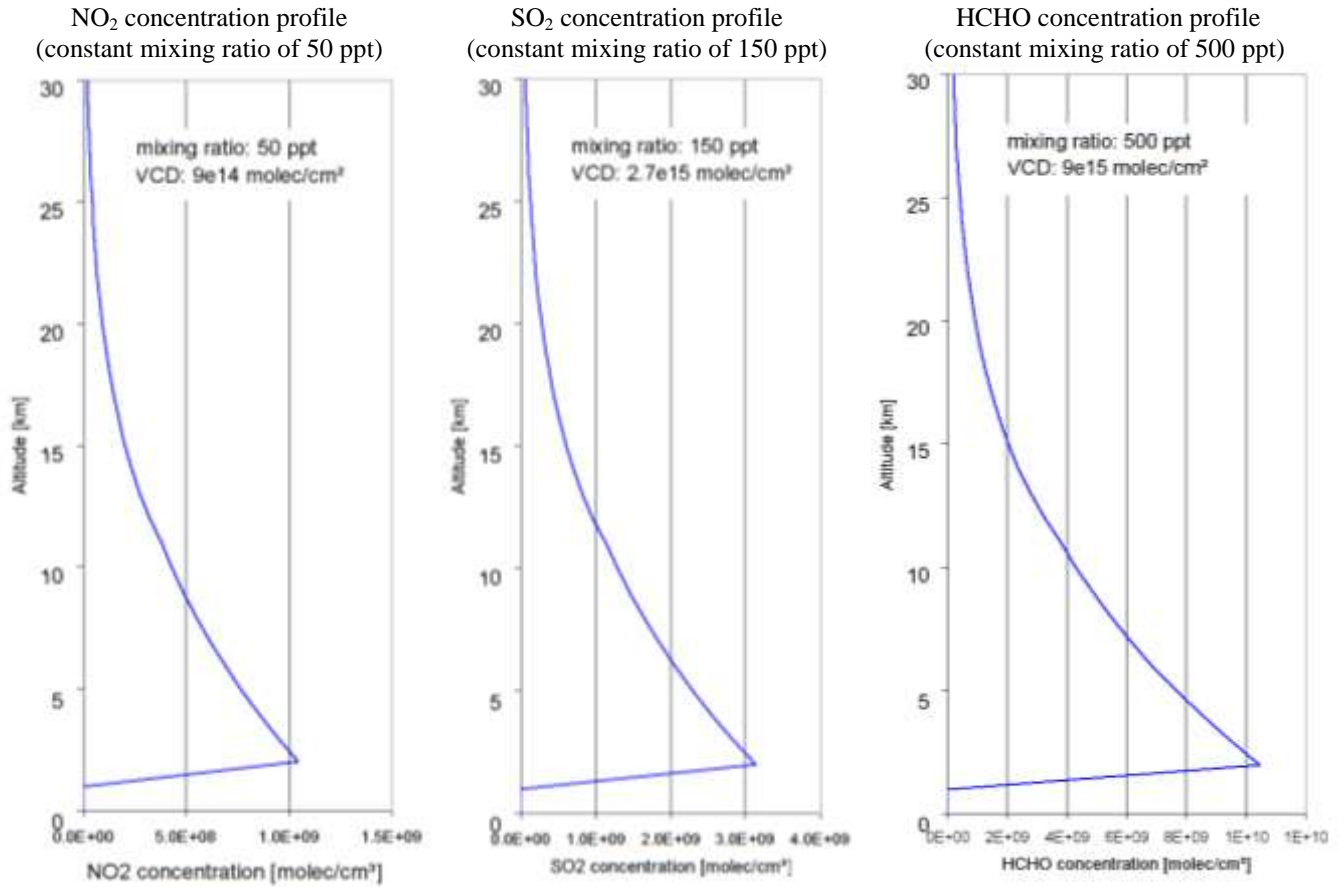

**Fig. S18** Vertical concentration profiles of NO<sub>2</sub>, SO<sub>2</sub>, and HCHO used in the radiative transfer simulations. In the figures also the corresponding vertical column densities (VCDs) are given.

5

In Fig. S19 the trace gas dSCDs of NO<sub>2</sub>, SO<sub>2</sub>, and HCHO corresponding to the used input profiles are shown as a function of the elevation angle. The trace gas dSCDs are given for different aerosol loads and for different seasons (left: summer; right: winter). Interestingly, for HCHO and SO<sub>2</sub>, the dSCDs at 1° elevation angle are almost independent from the aerosols load. In contrast, for the NO<sub>2</sub> dSCDs at 1° elevation angle a larger dependence on the aerosol load is found, probably because of less Rayleigh scattering at these longer wavelengths. Nevertheless, for simulations with AODs between 0.1 and 0.5, also the NO<sub>2</sub> dSCDs at 1° elevation angle very similar.

10



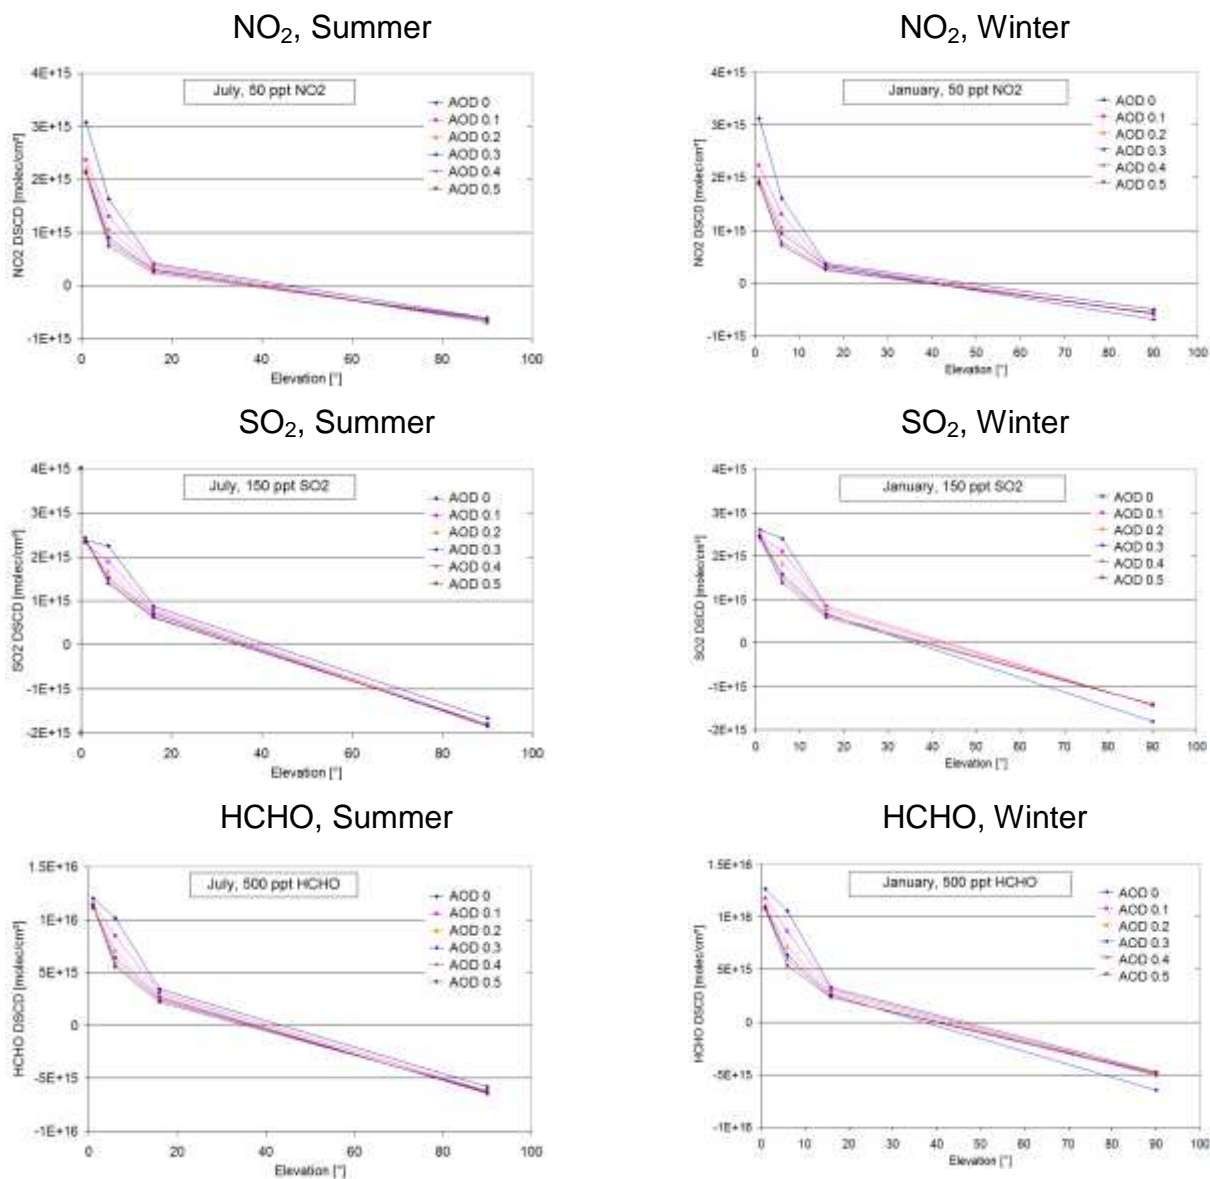

**Fig. S19** Trace gas dSCDs simulated for the profiles shown in Fig. 6 for summer (**left**) and winter (**right**). The individual lines represent results for different aerosol loads.

5

#### 4.2 BrO

For BrO the effect of the stratospheric BrO cannot be separated from the effect of (possible) tropospheric BrO absorptions. This is caused by the fact that the maximum of the stratospheric BrO is usually found only a few

kilometres above the tropopause. Thus, the BrO dSCDs retrieved for the stratospheric BrO absorption depend systematically on the elevation angle. Moreover, variations of the tropopause height directly influence the stratospheric BrO profile. Thus the measured BrO dSCDs become systematically dependent also on the tropopause height. Dorf et al. (2008) investigated the dependence of the stratospheric BrO mixing ratios as a function of the relative altitude with respect to the tropopause height (see [Supplement Sect. 5.2](#) and [Fig. S23](#)). The mixing ratio profile presented in Dorf et al. (2008) was also used in this study to calculate BrO concentration profiles as a function of the tropopause height (see [Fig. S20](#)).

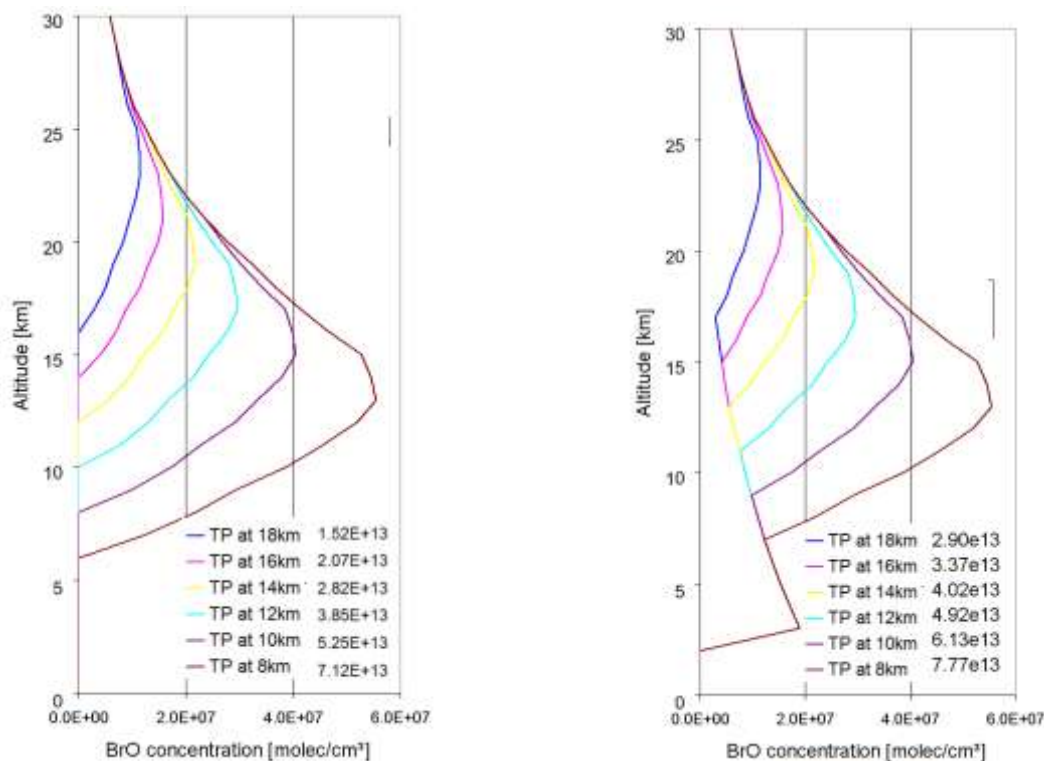

**Fig. S20** BrO concentration profiles as function of the tropopause height. **Left:** no BrO in the troposphere; **right:** 1ppt BrO in the troposphere (above 3km). The numbers in the figures represent the corresponding BrO VCDs.

## 5 Influence of stratospheric trace gas abundances on the MAX-DOAS results

### 5.1 NO<sub>2</sub>

In this section the influence of the stratospheric NO<sub>2</sub> absorption on the MAX-DOAS measurements at the WLG station are investigated. The underlying question is whether the simulation of the stratospheric and tropospheric absorptions can be separated (which makes the direct interpretation of the MAX-DOAS results much easier). To answer that question, the NO<sub>2</sub> dSCDs observed by the MAX-DOAS measurements corresponding to the stratospheric NO<sub>2</sub> absorption are simulated. For the radiative transfer simulations stratospheric NO<sub>2</sub> profiles provided by the study from Bauer et al. (2012) were used. They provide profiles for different seasons and latitude bands. Since the WLG station is located close to the border between two latitude bands (30°S to 30°N, and 30° to 60°N), the average of the profiles of both latitude bands were used. Two stratospheric profiles were derived, one for summer and one for winter (see Fig. S21).

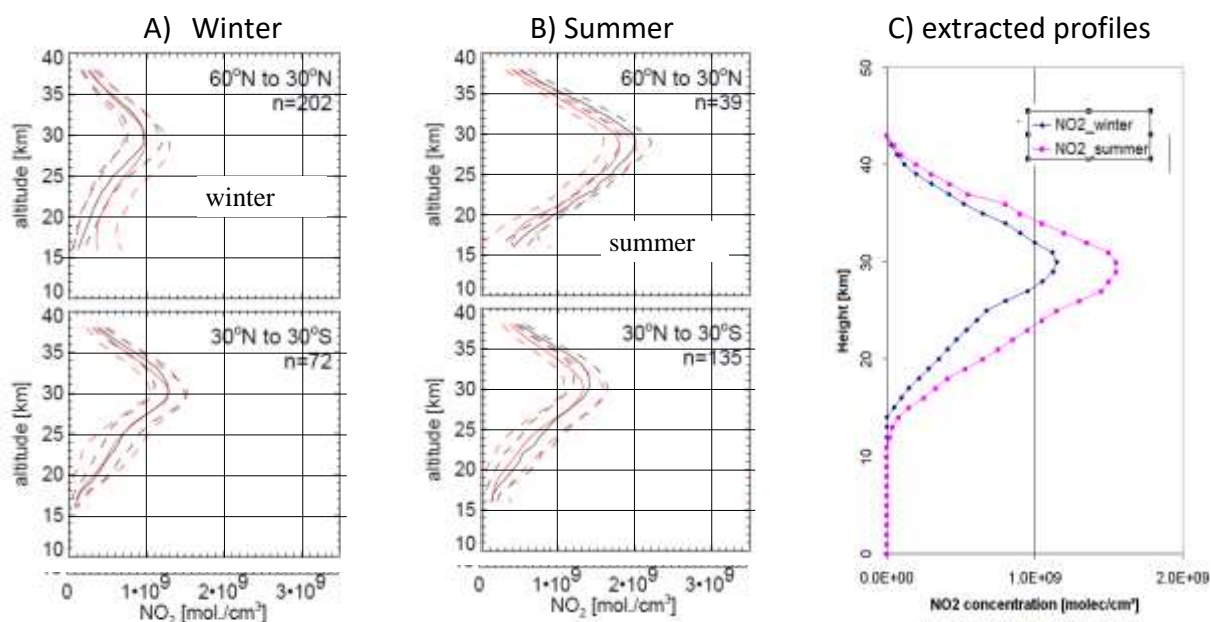

**Fig. S21** Stratospheric profiles taken from the study of Bauer et al. (2012) for Winter (**A**) and Summer (**B**) for the tropics and northern mid-latitudes. The right figure (**C**) shows the extracted profiles for summer and winter, which were used for the radiative transfer simulations. The corresponding VCDs are:  $1.51 \times 10^{15}$  molec/cm<sup>2</sup> (winter) and  $2.30 \times 10^{15}$  molec/cm<sup>2</sup> (summer).

In Fig. S22 the corresponding dSCDs simulated for the MAX-DOAS measurements at different elevation angles are shown. The deviations of the NO<sub>2</sub> dSCDs from zero are largest for 1° elevation angles. They are about  $-1 \times 10^{14}$  molec/cm<sup>2</sup> in winter and between  $-2 \times 10^{14}$  molec/cm<sup>2</sup> and  $-1 \times 10^{14}$  molec/cm<sup>2</sup> in summer. Thus they are about one order of

magnitude smaller than the observed NO<sub>2</sub> dSCDs (see Sect. 6.1). For the quantitative interpretation of the measured NO<sub>2</sub> dSCDs they can therefore be neglected.

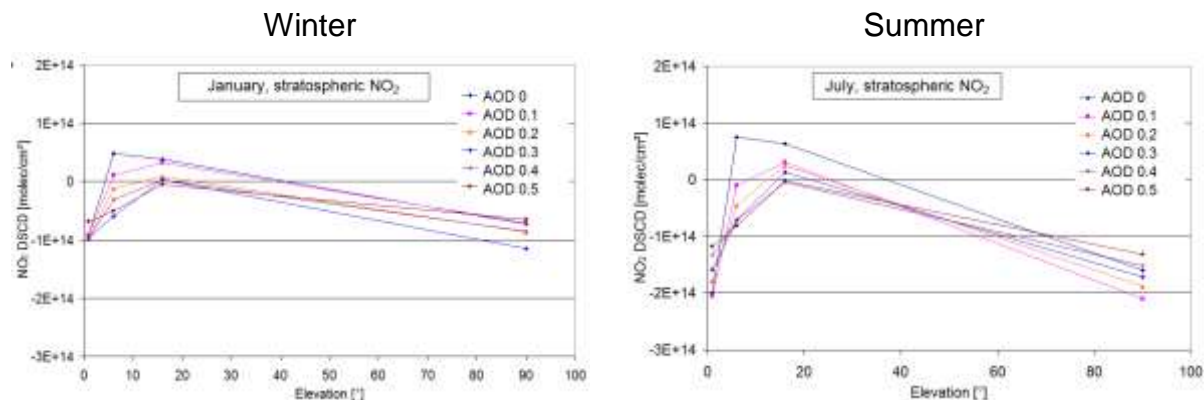

5 **Fig. S22** Simulated NO<sub>2</sub> dSCDs for the stratospheric profiles shown in Fig. S21 (right) for winter (left) and summer (right).

## 5.2 BrO

10

The stratospheric BrO profiles were constructed following the study of Dorf et al. (2008) who described the stratospheric BrO mixing ratio relative to the altitude of the tropopause height (Fig. S23A). We used their parameterisation, but with a slightly lower maximum BrO mixing ratio of 15 ppt instead of 16 ppt in order to account for the decrease of the stratospheric BrO load between the study of Dorf et al. (2008) and the measurements considered in this study. The two sub figures at the right side of Fig. S23 show the derived BrO height profiles for different tropopause layer heights. In Fig. S23B it is assumed that no BrO exists in the troposphere; in Fig. S23C a background BrO mixing of 1 ppt was assumed. The corresponding BrO dSCDs are shown in Figs. S24 and S25. Interestingly, negative BrO dSCDs are found for measurements at 1 °elevation angle if no BrO was assumed in the troposphere (Fig. S24). Substantially higher BrO dSCDs are found for the cases when a tropospheric background concentration of 1 ppt was assumed (Fig. S25).

15

20

25

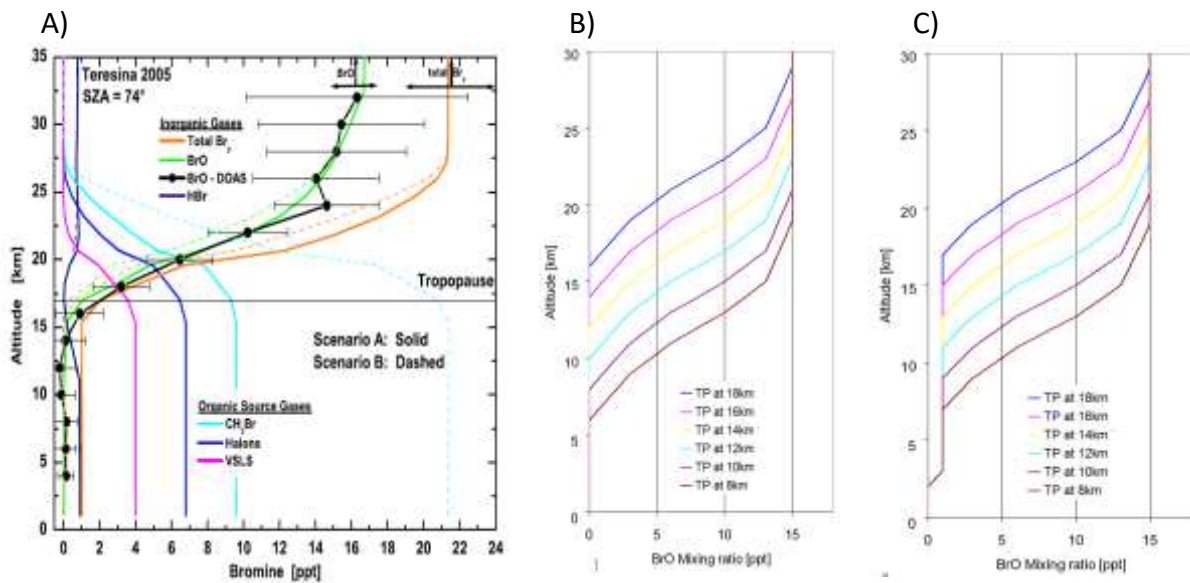

**Fig. S23** in Fig A): as Fig. 1 in Dorf et al. (2008): The green line represents the BrO mixing ratios derived from various measurements and model simulations as function of the relative height with respect to the tropopause (horizontal black line). In the two figures at the right the corresponding BrO mixing ratios are plotted as function of different tropopause heights. In Fig. B) no BrO was assumed in the troposphere; in Fig. C) a constant BrO mixing ratio of 1 ppt was assumed in the troposphere. Note that the decrease of the stratospheric BrO mixing ratio between 2008 and the period of the Tibet measurements of about -1 ppt was taken into account.

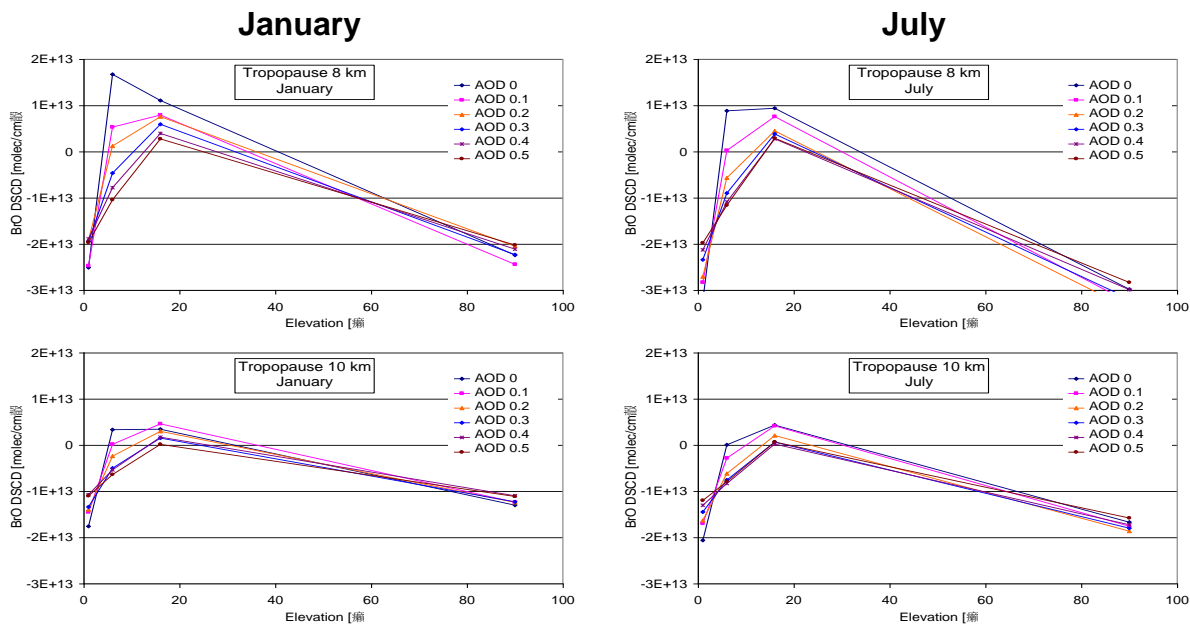

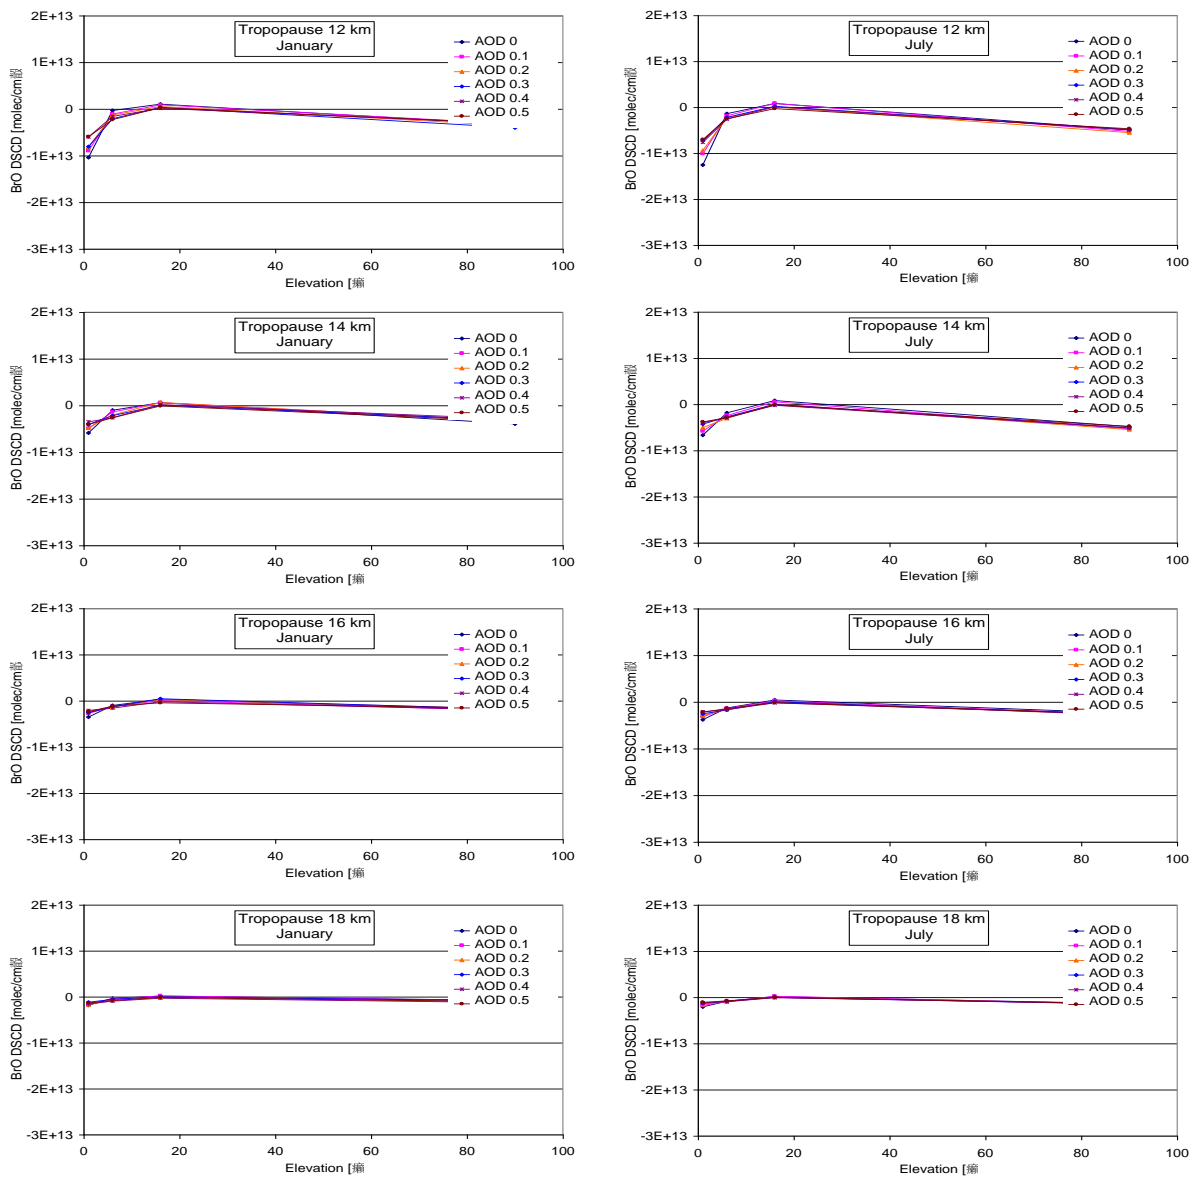

**Fig. S24** BrO dSCDs calculated for the profiles shown in Fig. S23B with zero BrO concentrations in the troposphere for different tropopause heights (**left**: winter; **right**: summer).

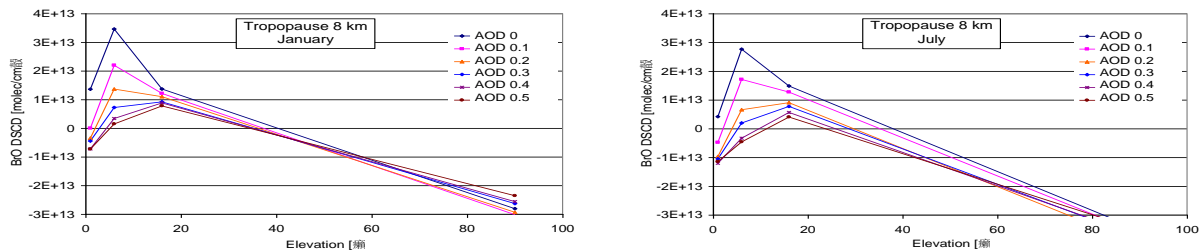

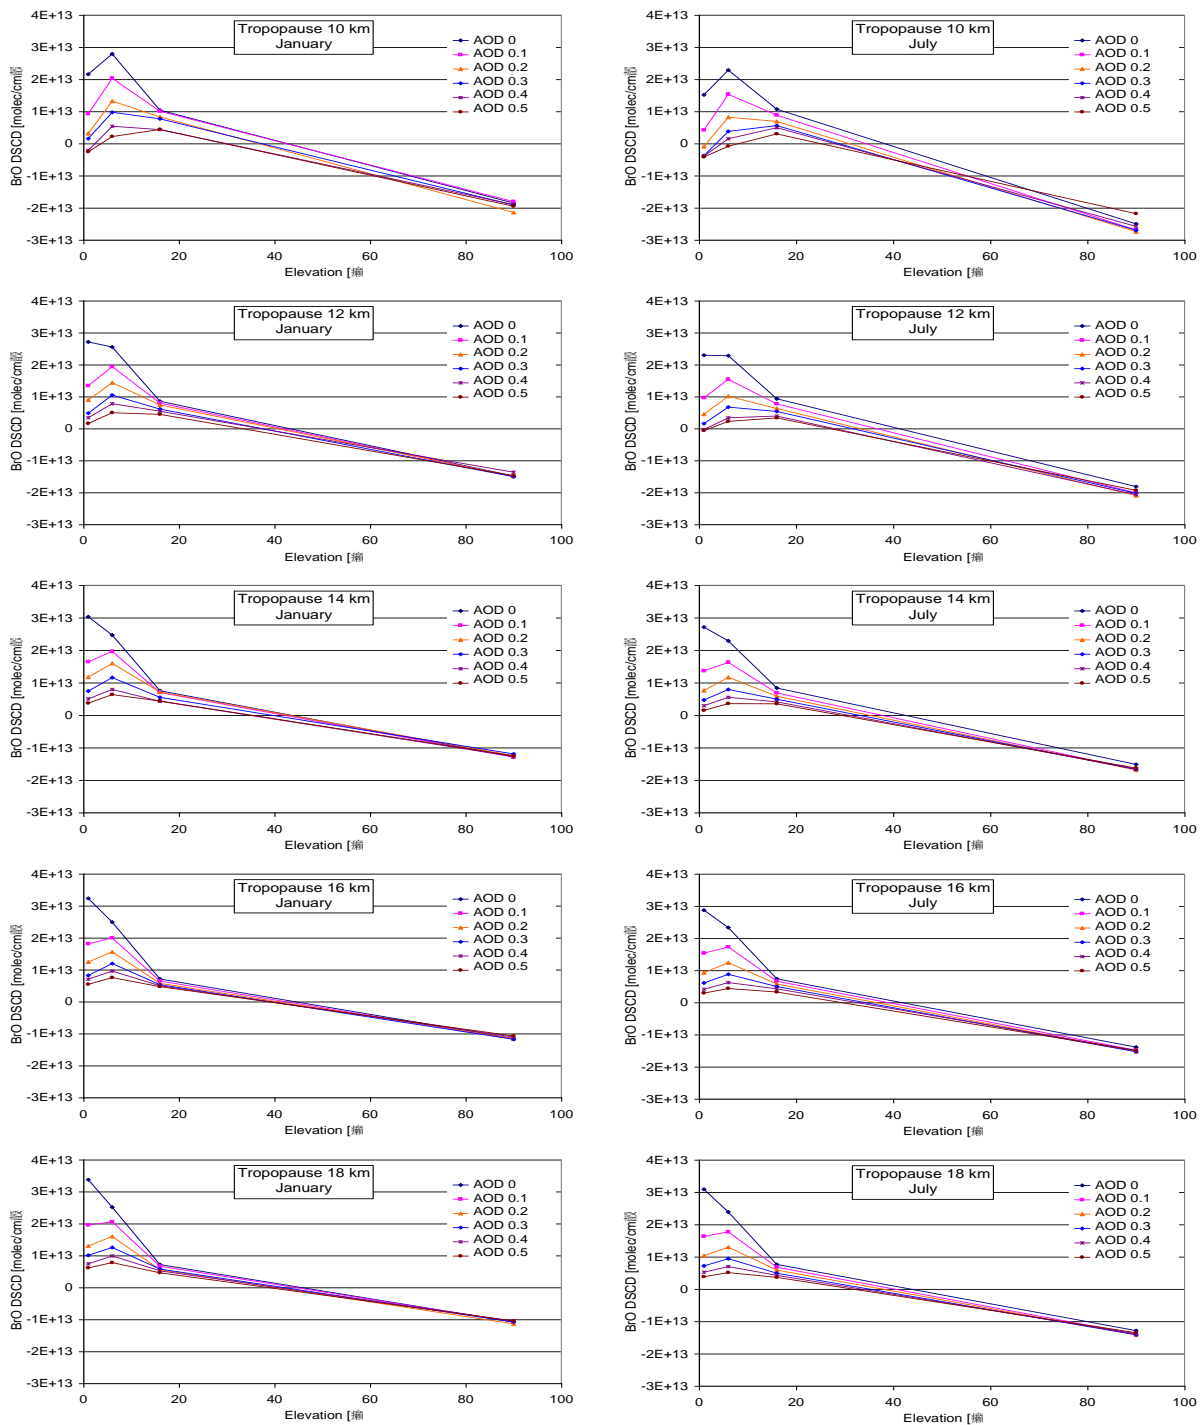

**Fig. S25** BrO dSCDs calculated for the profiles shown in Fig. S23C with 1 ppt BrO in the troposphere for different tropopause heights (**left: winter; right: summer**).

## 6 Cloud and aerosol filters

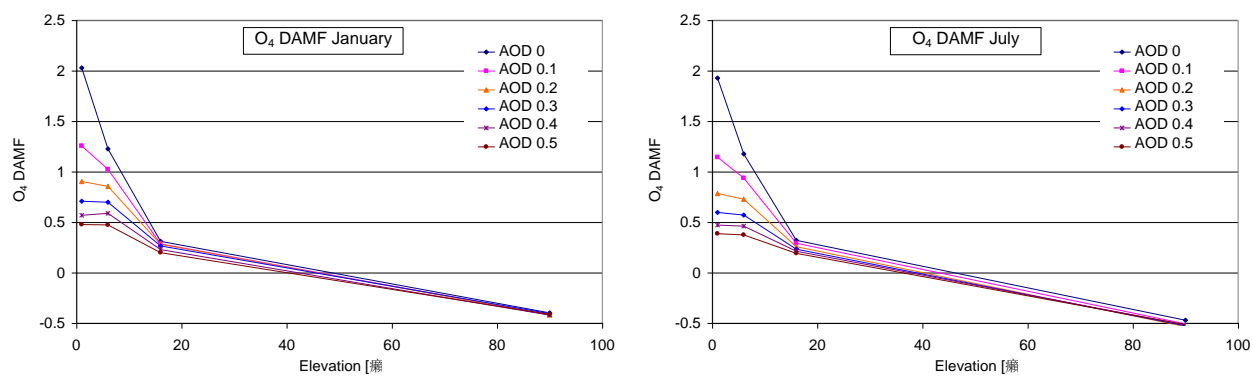

**Fig. S26** Simulated O<sub>4</sub> dAMFs for different aerosol loads for winter (**left**) and summer (**right**). Constant aerosol extinction was assumed between 2600 and 5600m.

5



Average O<sub>4</sub> dSCDs for clear sky conditions

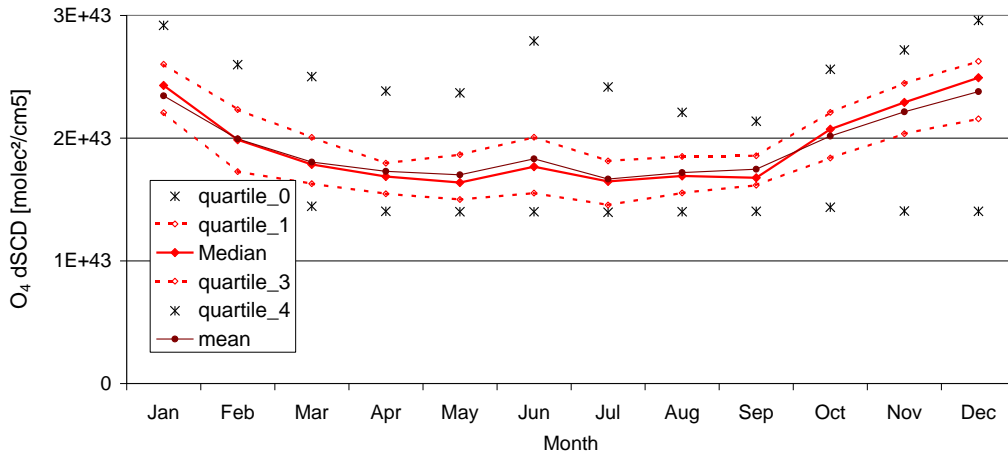

Average O<sub>4</sub> dSCDs for broken clouds

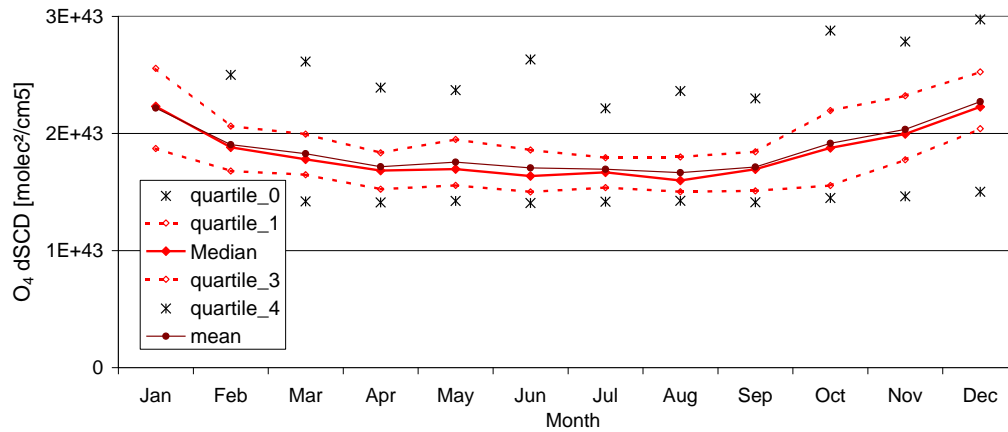

5

**Fig. S27** O<sub>4</sub> dSCDs at 1° elevation for clear sky (**top**) and broken clouds (**bottom**) spectra (averages of 10 original spectra for 2012 - 2015) with number of scans > 800 and RMS of the O<sub>4</sub> fit < 2e-3.

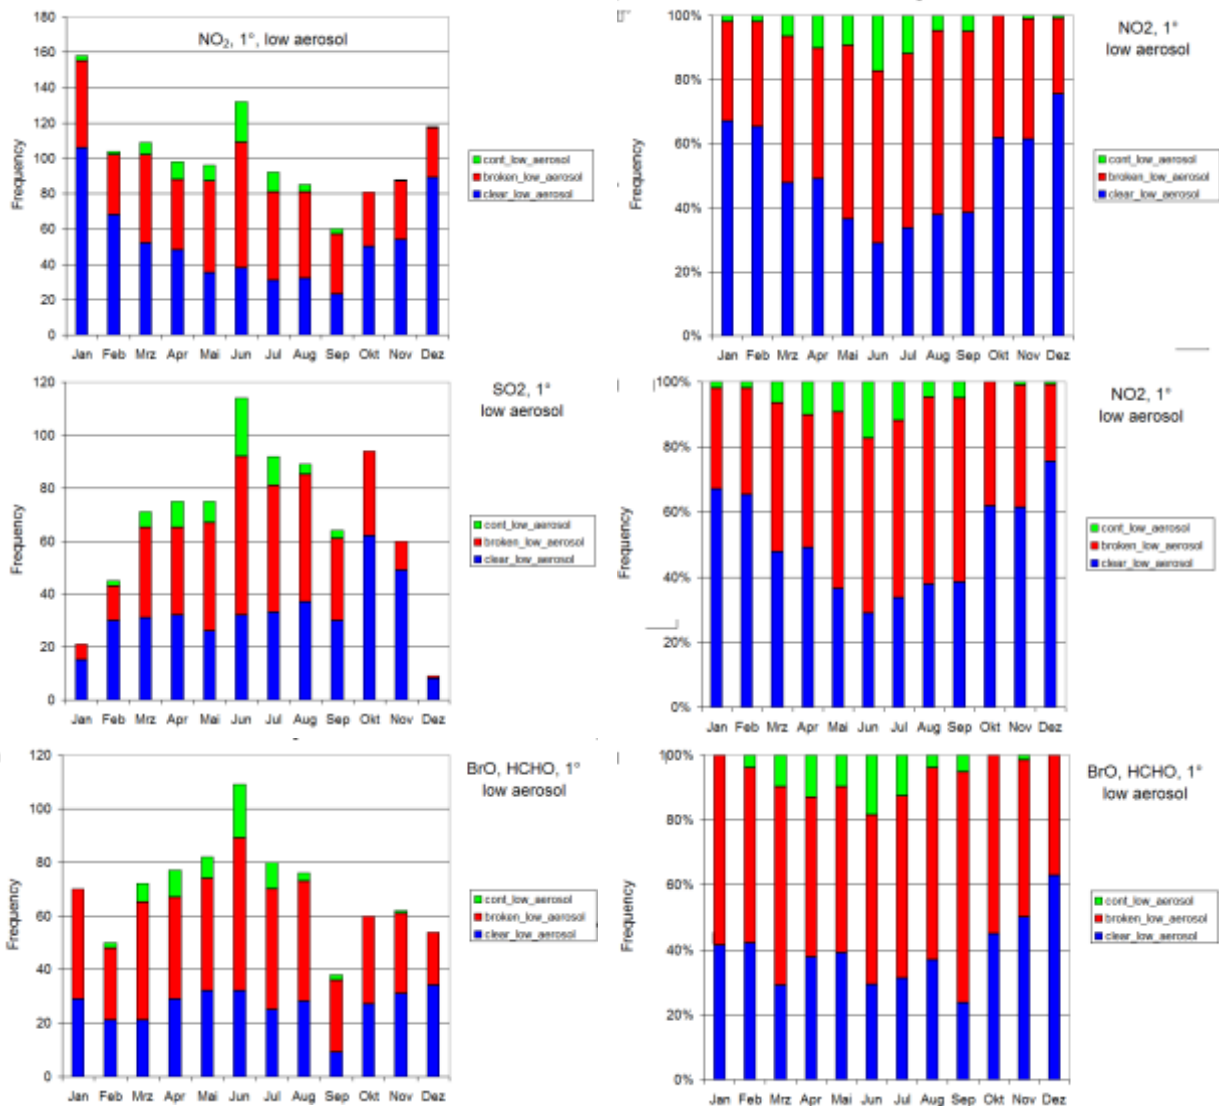

**Fig. S28** Absolute (**left**) and relative (**right**) frequency of the different sky conditions for results of selected trace gases (top: NO<sub>2</sub>, middle: BrO and HCHO, bottom: SO<sub>2</sub>). The statistics are based on the number of observations at 1° elevation angle (mean of 10 original spectra from April 2012 to April 2015). In addition to the filter for the removal of high aerosol loads, also the specific RMS filters for the different trace gases are applied (see [Supplement Sect. 3.3](#)).

## 7 Seasonal means of the dSCDs under broken cloud conditions

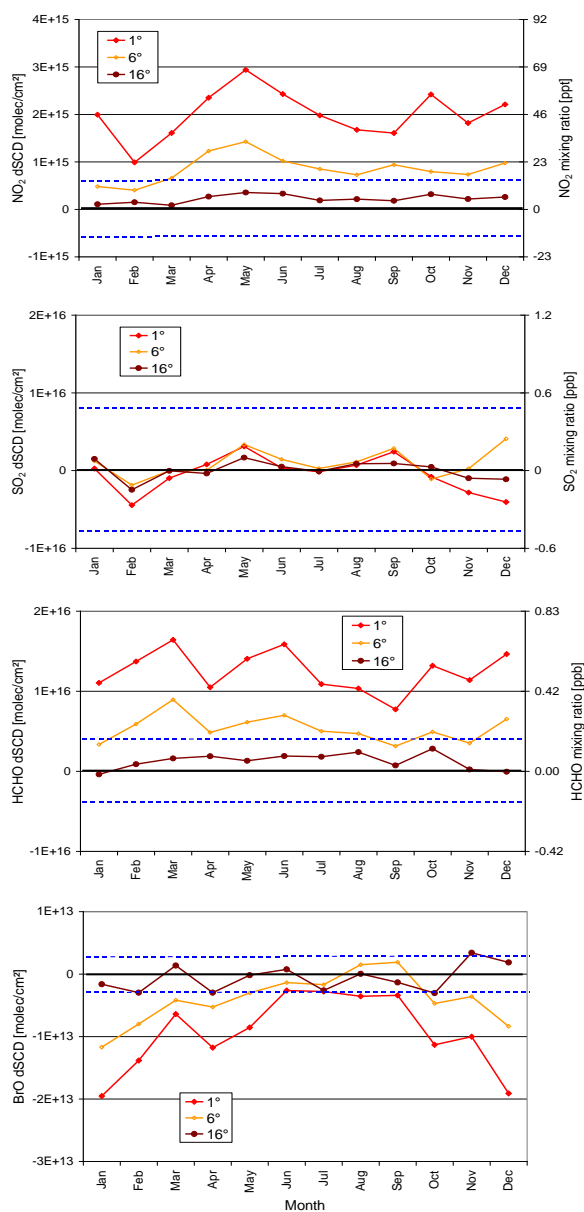

**Figure S29** Seasonal means of the trace gas dSCDs for different elevation angles for broken clouds and low aerosol load. For NO<sub>2</sub>, SO<sub>2</sub>, and HCHO the right axes represent the approximate mixing ratios for measurements at 1° elevation angle. The blue dotted lines indicate the systematic uncertainties, which can be considered as lower bound of the detection limit.

## 8 Estimation of tropospheric BrO mixing ratios from the measured BrO dSCDs

Fig. S30 shows the dependence of the measured BrO dSCDs for different elevation angles together with simulation results for tropospheric background mixing ratios of 0 ppt or 1 ppt. While for 1 ° elevation a strong dependence on the tropopause height is found, such a dependency is not observed for the higher elevation angles. These findings are consistently found for the measurements and simulations (but the measured BrO dSCDs show a rather large scatter). Interestingly, the differences between the simulated BrO dSCDs for 0 and 1 ppt tropospheric background are almost constant. This finding indicates that the increase of the measured BrO dSCDs (with respect to a simulation without a tropospheric BrO background) caused by an increase of the tropospheric BrO background is almost proportional to the tropospheric BrO mixing ratio.

10 For the estimation of the (upper limit of the) tropospheric BrO background the measurements at 1 ° elevation angle are chosen, because they are most sensitive to BrO absorptions in the troposphere (the difference between the simulations for 0 and 1 ppt in Fig. S30 are largest for an elevation angle of 1 °). To account for the dependence on the tropopause height the following procedure was applied:

15 First the measured BrO dSCDs are subtracted from the simulated BrO dSCDs for the same tropopause height. This is done for the simulations for 0 ppt as well as 1 ppt background BrO. From the obtained differences the mean values and the standard deviations are calculated. For 0 ppt the mean difference is  $0.9 \cdot 10^{13}$  molec/cm<sup>2</sup>; for 1 ppt it is  $2.4 \cdot 10^{13}$  molec/cm<sup>2</sup>. The standard deviation for both differences is  $1.0 \cdot 10^{13}$  molec/cm<sup>2</sup>.

In the next step the total error (of the difference between simulations and measurements) is calculated as the sum of the standard deviation and the estimate for the systematic error of  $0.3 \cdot 10^{13}$  molec/cm<sup>2</sup> (see Supplement Sect. 3.3.3).

20 In the final step the total error ( $1.3 \cdot 10^{13}$  molec/cm<sup>2</sup>) is compared to the mean values of the differences for 0 ppt and 1 ppt. The total error is found above the mean difference for the simulations for 0 ppt BrO ( $0.9 \cdot 10^{13}$  molec/cm<sup>2</sup>), and below the mean difference for the simulations for 1 ppt BrO ( $2.4 \cdot 10^{13}$  molec/cm<sup>2</sup>). Assuming that the (increase of the) measured BrO dSCD depends linearly on the BrO background mixing ratio (see above), **an upper limit for the BrO background mixing ratio of 0.23 ppt is obtained.** From similar calculations for 6 ° and 16 ° elevation, upper limits of  
25 0.34 ppt and 0.60 ppt are found, respectively.

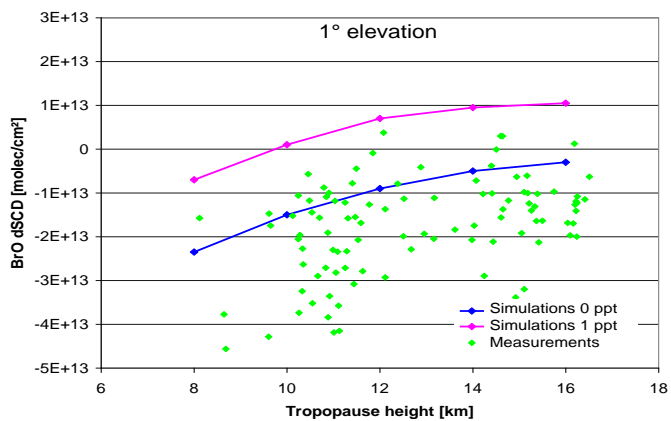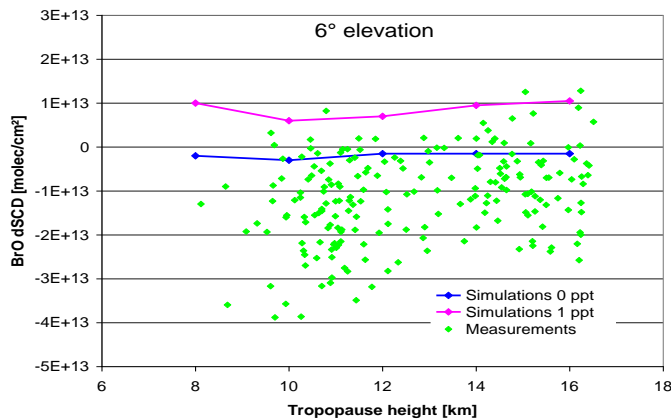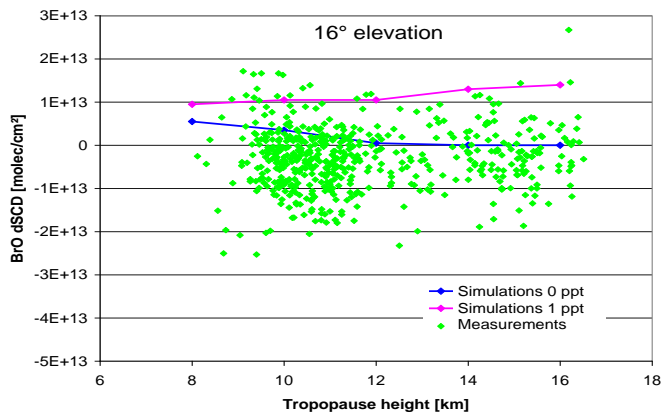

**Fig. S30** Comparison of measured and simulated BrO dSCDs as function of the tropopause height for clear sky conditions. The blue and magenta lines represent simulation results for 1 ppt and 0 ppt BrO in the troposphere, respectively.

## References

- Bauer, R., Rozanov, A., McLinden, C. A., Gordley, L. L., Lotz, W., Russell Iii, J. M., Walker, K. A., Zawodny, J. M., Ladstätter-Weissenmayer, A., Bovensmann, H., and Burrows, J. P.: Validation of SCIAMACHY limb NO<sub>2</sub> profiles using solar occultation measurements, *Atmos. Meas. Tech.*, 5, 1059-1084, 10.5194/amt-5-1059-2012, 2012.
- 5 Bogumil, K., Orphal, J., Homann, T., Voigt, S., Spietz, P., Fleischmann, O. C., Vogel, A., Hartmann, M., Bovensmann, H., Frerik, J., and Burrows, J. P.: Measurements of molecular absorption spectra with the SCIAMACHY Pre-Flight model: Instrument characterization and reference data for atmospheric remote-sensing in the 230–2380 nm region, *J. Photochem. Photobiol. A.*, 157, 167–184, 2003.
- Dorf, M., Butz, A., Camy-Peyret, C., Chipperfield, M. P., Kritten, L., and Pfeilsticker, K.: Bromine in the tropical  
10 troposphere and stratosphere as derived from balloon-borne BrO observations, *Atmos. Chem. Phys.*, 8, 7265-7271, 10.5194/acp-8-7265-2008, 2008.
- Meller, R., and Moortgat, G. K.: Temperature dependence of the absorption cross sections of formaldehyde between 223 and 323 K in the wavelength range 225–375 nm, *J. Geophys. Res.*, 105, 7089–7101, 2000.
- Thalman, R., and Volkamer, R.: Temperature dependent absorption cross-sections of O<sub>2</sub>–O<sub>2</sub> collision pairs between 340  
15 and 630 nm and at atmospherically relevant pressure, *Phys. Chem. Chem. Phys.*, 15, 15371, 2013.
- Vandaele, A. C., Hermans, C., Fally, S., Carleer, M., Colin, R., Mérienne, M.-F., Jenouvrier, A., and Coquart, B.: High-resolution Fourier transform measurement of the NO<sub>2</sub> visible and near-infrared absorption cross sections: Temperature and pressure effects, *Journal of Geophysical Research: Atmospheres*, 107, ACH 3-1-ACH 3-12, 10.1029/2001jd000971, 2002.
- 20 Wilmouth, D. M., Hanisco, T. F., Donahue, N. M., and Anderson, J. G.: Fourier transform ultraviolet spectroscopy of the A<sup>2</sup>Π<sub>3/2</sub>–X<sup>2</sup>Π<sub>3/2</sub> transition of BrO, *J. Phys. Chem. A.*, 103, 8935–8945, 1999.
